# Supplementary material
Source: publisher figshare collection journal article supplement (https://diabetesjournals.figshare.com/ndownloader/files/27742743)
Supplement: Supplementary file 1 [file 27742743]

## Online-Only Supplemental Material

### A Type 2 Diabetes Subtype Responsive to ACCORD Intensive Glycemia Treatment

Arshiya Mariam, B.S.<sup>1,\*</sup>, Galen Miller-Atkins, M.S.<sup>1,\*</sup>, Kevin M. Pantalone, D.O.<sup>2</sup>, Robert S. Zimmerman, M.D.<sup>2</sup>, John Barnard, Ph.D.<sup>1</sup>, Michael W. Kattan Ph.D.<sup>1</sup>, Hetal Shah, M.D.<sup>3</sup>, Howard L. McLeod, PharmD<sup>4</sup>, Alessandro Doria, M.D., Ph.D.<sup>3</sup>, Michael J. Wagner, Ph.D.<sup>5</sup>, John B. Buse, M.D., Ph.D.<sup>6</sup>, Alison A. Motsinger-Reif, Ph.D.<sup>7</sup>, Daniel M. Rotroff, Ph.D.<sup>1,#</sup>

1. Department of Quantitative Health Sciences, Lerner Research Institute, Cleveland Clinic, Cleveland, OH, USA
2. Endocrinology and Metabolism Institute, Cleveland Clinic, Cleveland, OH, USA
3. Joslin Diabetes Center and Harvard Medical School, Boston, MA, USA
4. USF Taneja College of Pharmacy, Tampa, FL, USA
5. Center for Pharmacogenomics and Individualized Therapy, University of North Carolina at Chapel Hill, Chapel Hill, NC, USA
6. Division of Endocrinology, School of Medicine, University of North Carolina at Chapel Hill, Chapel Hill, NC, USA
7. Biostatistics and Computational Biology Branch, National Institute of Environmental Health Sciences, Research Triangle Park, NC, USA

\*equal contribution

#Corresponding Author:

Daniel M. Rotroff, PhD, MSPH  
Department of Quantitative Health Sciences  
Lerner Research Institute  
Cleveland Clinic  
9500 Euclid Avenue,  
JJN3-01,  
Cleveland, OH 44195, USA  
Phone: 216-444-3399  
Email: [rotrofd@ccf.org](mailto:rotrofd@ccf.org)

|                                                                                                                                          |           |
|------------------------------------------------------------------------------------------------------------------------------------------|-----------|
| <b>SUPPLEMENTAL APPROACHES .....</b>                                                                                                     | <b>5</b>  |
| <b>CLUSTERING .....</b>                                                                                                                  | <b>5</b>  |
| EARLY-TIME-WEIGHTED DYNAMIC TIME WARPING (ETWDTW) .....                                                                                  | 5         |
| <i>Table S1. Characterization of clinical groups .....</i>                                                                               | <i>5</i>  |
| <i>Table S2: Clinical and demographic factors considered in analyses.....</i>                                                            | <i>6</i>  |
| <i>Table S3: Covariates selected in GWAS.....</i>                                                                                        | <i>7</i>  |
| <b>PATHWAY ANALYSIS .....</b>                                                                                                            | <b>8</b>  |
| <b>DEVELOPMENT OF MODEL FOR CLINICAL GROUP PREDICTION.....</b>                                                                           | <b>8</b>  |
| POLYGENIC SCORES (PS) .....                                                                                                              | 8         |
| <i>Table S4. Parameter Values for Constructing the PS. ....</i>                                                                          | <i>8</i>  |
| MODEL TRAINING .....                                                                                                                     | 9         |
| <b>ASSESSMENT OF MODEL FOR CLINICAL GROUP PREDICTION .....</b>                                                                           | <b>9</b>  |
| PROPENSITY SCORE MATCHING .....                                                                                                          | 9         |
| EFFECT OF SAMPLE SIZE ADJUSTMENT ON OBSERVED RISK DIFFERENCES .....                                                                      | 9         |
| <b>DIRECT PREDICTION OF CVD OUTCOMES .....</b>                                                                                           | <b>10</b> |
| <b>COMPARISON TO 2-SNP GENETIC RISK SCORE (GRS) FROM SHAH ET AL. ....</b>                                                                | <b>10</b> |
| <b>SUPPLEMENTAL RESULTS .....</b>                                                                                                        | <b>11</b> |
| <b>CLUSTERING .....</b>                                                                                                                  | <b>11</b> |
| AGGREGATED TRAJECTORIES FOR CLUSTERS.....                                                                                                | 11        |
| <i>Figure S1. Individual HbA1c trajectories for intensive clinical groups and standard arm .....</i>                                     | <i>11</i> |
| <i>Figure S2. HbA1c distribution across time for intensive clinical groups and standard arm .....</i>                                    | <i>12</i> |
| DISTRIBUTION OF BASELINE HbA1C SEEN IN CLUSTERS .....                                                                                    | 12        |
| <i>Figure S3. HbA1c distribution for individuals in clinical groups and standard arm at baseline. ....</i>                               | <i>13</i> |
| PERMUTATION TESTING FOR COMPOSITE TRAJECTORY REPRESENTATION.....                                                                         | 13        |
| <i>Fig S4. Permuted within group sum of squares (WGSS) distributions. ....</i>                                                           | <i>14</i> |
| <b>RISK OF OUTCOMES IN CLINICAL GROUPS COMPARED TO STANDARD TREATMENT. ....</b>                                                          | <b>14</b> |
| RISKS OF MICROVASCULAR EVENTS BETWEEN HbA1C CLUSTERS .....                                                                               | 14        |
| <i>Fig S5. Risk of microvascular outcomes in clinical groups compared to standard treatment.....</i>                                     | <i>15</i> |
| RISKS OF HYPOGLYCEMIA BETWEEN HbA1C CLUSTERS.....                                                                                        | 15        |
| <i>Figure S6. Risks of hypoglycemia between HbA1c clusters.....</i>                                                                      | <i>16</i> |
| <b>COMPARISON OF RISK OUTCOMES BASED ON RUDIMENTARY BINNING OF HbA1C TRAJECTORIES .....</b>                                              | <b>17</b> |
| OUTCOME RISK CATEGORIZATION BASED ON MEDIAN HbA1C QUANTILES WITHIN 1 YEAR OF BASELINE .....                                              | 17        |
| <i>Figure S7. Classification using median HbA1c quartiles within first year of baseline. ....</i>                                        | <i>17</i> |
| OUTCOME RISK CATEGORIZATION BASED ON MEDIAN HbA1C QUANTILES ACROSS THE ENTIRE TRAJECTORY .....                                           | 18        |
| <i>Figure S8. Classification using median HbA1c quartiles across entire HbA1c after baseline measurements. ....</i>                      | <i>18</i> |
| <b>BASELINE CLINICAL AND DEMOGRAPHIC DIFFERENCES BETWEEN HbA1C CLINICAL GROUPS .....</b>                                                 | <b>19</b> |
| <i>Table S5. Baseline medication differences between clinical groups (q&lt;0.01).....</i>                                                | <i>19</i> |
| <i>Table S6. Baseline medication differences between clinical groups after adjusting for years with type 2 diabetes (q&lt;0.01).....</i> | <i>20</i> |
| <i>Table S7. Other clinical and demographic differences between clinical groups at baseline (q&lt;0.01) .....</i>                        | <i>21</i> |

|                                                                                                                                                                                                                                                                                                                               |           |
|-------------------------------------------------------------------------------------------------------------------------------------------------------------------------------------------------------------------------------------------------------------------------------------------------------------------------------|-----------|
| Table S8. Other clinical and demographic differences between clinical groups at baseline after adjusting for years with type 2 diabetes ( $q < 0.01$ ).                                                                                                                                                                       | 23        |
| Table S9. On-trial differences in lipids and blood pressure between C4 and other clusters in the intensive glycemia trial arm.                                                                                                                                                                                                | 26        |
| Figure S9. Variation explained for cardiovascular and microvascular outcomes by on-trial risk factors.                                                                                                                                                                                                                        | 27        |
| <b>GENOME-WIDE ASSOCIATION TESTS AND VARIABLE SELECTION</b>                                                                                                                                                                                                                                                                   | <b>27</b> |
| Table S10. GWAS results for SNPs that reached suggestive significance ( $P < 5 \times 10^{-6}$ ).                                                                                                                                                                                                                             | 27        |
| Figure S10. Q-Q plot for observed P values.                                                                                                                                                                                                                                                                                   | 29        |
| PATHWAY ANALYSIS                                                                                                                                                                                                                                                                                                              | 29        |
| Table S11. Ontology terms associated with SNPs in PS based on enrichment analysis ( $FDR P < .05$ ).                                                                                                                                                                                                                          | 29        |
| <b>DEVELOPMENT OF MODEL FOR CLINICAL GROUP PREDICTION</b>                                                                                                                                                                                                                                                                     | <b>32</b> |
| POLYGENIC SCORES (PS)                                                                                                                                                                                                                                                                                                         | 32        |
| Figure S11. Comparison between effects sizes from GWAS and SCT-PS.                                                                                                                                                                                                                                                            | 32        |
| Figure S12. Box plots for SCT-PS by clinical group assignment.                                                                                                                                                                                                                                                                | 33        |
| MODEL TRAINING                                                                                                                                                                                                                                                                                                                | 33        |
| Table S12. Clinical and demographic covariates selected by LASSO.                                                                                                                                                                                                                                                             | 34        |
| Table S13. Model performance for predicting C4 membership.                                                                                                                                                                                                                                                                    | 34        |
| Figure S13. Boxplots of 10-fold cross-validation results.                                                                                                                                                                                                                                                                     | 35        |
| <b>ASSESSMENT OF MODEL FOR CLINICAL GROUP PREDICTION</b>                                                                                                                                                                                                                                                                      | <b>35</b> |
| PROPENSITY SCORE MATCHING                                                                                                                                                                                                                                                                                                     | 35        |
| MENDELIAN RANDOMIZATION                                                                                                                                                                                                                                                                                                       | 35        |
| Figure S14. Forest plot showing causal inference of median HbA1c as the exposure variable on CVD risk with SCT-PS as the instrumental variable.                                                                                                                                                                               | 36        |
| EFFECT OF SAMPLE SIZE ADJUSTMENT ON OBSERVED RISK DIFFERENCES                                                                                                                                                                                                                                                                 | 36        |
| Figure S15. Meta-analyzed risk differences of the SCT-PS model only (no clinical features) between varied sample sizes for predicted intensive and standard groups.                                                                                                                                                           | 37        |
| Figure S16. Meta-analyzed risk differences of the SCT-PS model with clinical features between varied sample sizes for predicted intensive and standard groups.                                                                                                                                                                | 38        |
| SCT-PS PREDICTED <b>NON-C4</b> CVD RISK FOR INTENSIVE VERSUS STANDARD TREATMENT                                                                                                                                                                                                                                               | 38        |
| Figure S17. Meta-analyzed risk differences of intensive versus standard treatment of the SCT-PS model for individuals predicted to not be members of C4.                                                                                                                                                                      | 39        |
| SCT-PS STRATIFICATION BY RACE                                                                                                                                                                                                                                                                                                 | 40        |
| Figure S18. Forest plot of hazard ratios (HR) between of individuals that self-identified as White that were predicted to be in the C4 clinical group based on the SCT-PS that received intensive glycemia treatment compared to those that received standard treatment.                                                      | 40        |
| Figure S19. Forest plot of hazard ratios (HR) between of individuals that self-identified as non-White that were predicted to be in the C4 clinical group based on the SCT-PS that received intensive glycemia treatment compared to those that received standard treatment.                                                  | 41        |
| Figure S20. Forest plot of hazard ratios (HR) for microvascular events between predicted C4 in intensive arm and predicted C4 in standard arm.                                                                                                                                                                                | 42        |
| <b>DIRECT PREDICTION OF CVD OUTCOMES</b>                                                                                                                                                                                                                                                                                      | <b>42</b> |
| Table S14. Model accuracy for directly predicting MACE and total mortality outcomes.                                                                                                                                                                                                                                          | 42        |
| <b>COMPARISON TO 2-SNP GENETIC RISK SCORE (GRS) FROM SHAH ET AL.</b>                                                                                                                                                                                                                                                          | <b>43</b> |
| Figure S21. Forest plot of hazard ratios (HR) between of individuals that self-identified as White that were predicted to be in the C4 clinical group based on the SCT-PS that received intensive glycemia treatment compared to those that received standard treatment and those with a 2-SNP GRS of 0, based on Shah et al. | 44        |
| Figure S22. Forest plot of hazard ratios (HR) between of individuals across all races that were predicted to be in the C4 clinical group based on the SCT-PS that received intensive glycemia treatment compared to those that received standard treatment and those with a 2-SNP GRS of 0, based on Shah et al.              | 45        |

**REFERENCES .....46**

## Supplemental Approaches

### Clustering

#### Early-Time-Weighted Dynamic Time Warping (etwDTW)

Dynamic time warping (DTW) has been used extensively for time series pattern matching and in speech recognition and image analysis.<sup>1</sup> DTW works by generating a non-linear, multiple alignment map to compare two trajectories and calculates the cost of each point alignment. The alignment with the minimum cost is considered to be the optimal alignment. Compared to point-to-point alignment, multiple alignments are more robust to minor structural distortions.<sup>2</sup> Consequently, the cost metric is a more relevant dissimilarity measure than the sum of linear point to point Euclidean distance. etwDTW calculated Euclidean distance between each combination of points along two trajectories, creating an  $M \times N$  matrix, where  $M$  is the number of points in one trajectory and  $N$  is the number of points in the second trajectory. The minimum cost is determined from the optimal path in the  $M \times N$  matrix. etwDTW sums the Euclidean distance of the previously aligned points for each alignment. This aggregated distance matrix was then used to calculate minimum cost of pairwise trajectory alignment and has the effect of weighting the cost of earlier differences in the trajectories more than differences observed later in the trajectories.

Hierarchical clustering with Ward's method was used to cluster patient HbA1c trajectories based on etwDTW dissimilarity for each of the nine outcomes<sup>3,4</sup>. Clustering was performed in an unsupervised manner. Post-clustering, cophenetic distances of the clustering dendrograms were calculated, and these were summed for all nine outcome dendrograms to generate a cophenetic dissimilarity matrix<sup>5</sup>. Hierarchical clustering with Ward's method was used again to cluster patient HbA1c trajectories based on cophenetic dissimilarity. The optimal number of clusters ( $k$ ) was determined by comparing the risk of outcomes for each split in the dendrogram using Cox proportional hazards. The optimal  $k$  was the number of clusters preceding a non-significant split ( $P > .05$ ) (Fig. 1). For each cluster, composite trajectories were created by averaging the HbA1c values across all individuals at each time point within the cluster. For each cluster, composite trajectories were created by averaging the HbA1c values across all individuals at each time point within the cluster.

**Table S1. Characterization of clinical groups**

|                                                 | Intensive arm (N = 4,946)      |                                                 |                                               |                                               |                                               | Standard arm<br>(N = 5,119) |
|-------------------------------------------------|--------------------------------|-------------------------------------------------|-----------------------------------------------|-----------------------------------------------|-----------------------------------------------|-----------------------------|
|                                                 | <i>All Clinical<br/>Groups</i> | <i>Clinical<br/>Group 1 (C1)<br/>(N = 1538)</i> | <i>Clinical<br/>Group 2 (C2)<br/>(N=1266)</i> | <i>Clinical<br/>Group 3 (C3)<br/>(N= 775)</i> | <i>Clinical<br/>Group 4 (C4)<br/>(N=1367)</i> |                             |
| MACE <sup>1</sup>                               | 470 (9.50)                     | 168 (10.92)                                     | 135 (10.66)                                   | 125 (16.13)                                   | 42 (3.07)                                     | 543 (10.61)                 |
| Cardiovascular mortality                        | 159 (3.21)                     | 53 (3.45)                                       | 38 (3.00)                                     | 57 (7.35)                                     | 11 (0.80)                                     | 144 (2.81)                  |
| Total mortality <sup>2</sup>                    | 338 (6.83)                     | 114 (7.41)                                      | 86 (6.79)                                     | 106 (13.68)                                   | 32 (2.34)                                     | 327 (6.39)                  |
| Congestive heart failure <sup>3</sup>           | 226 (4.57)                     | 67 (4.36)                                       | 61 (4.82)                                     | 57 (7.35)                                     | 41 (3.00)                                     | 212 (4.14)                  |
| Non-fatal myocardial<br>infarction <sup>3</sup> | 281 (5.68)                     | 115 (7.48)                                      | 76 (6.00)                                     | 63 (8.13)                                     | 27 (1.98)                                     | 344 (6.72)                  |
| Non-fatal stroke <sup>3</sup>                   | 77 (1.56)                      | 12 (0.78)                                       | 36 (2.84)                                     | 24 (3.10)                                     | 5 (0.37)                                      | 94 (1.84)                   |
| Total stroke <sup>4</sup>                       | 85 (1.71)                      | 16 (1.04)                                       | 38 (3.00)                                     | 25 (3.23)                                     | 6 (0.44)                                      | 106 (2.07)                  |
| Expanded macrovascular<br>events                | 1115 (22.54)                   | 363 (23.60)                                     | 304 (24.01)                                   | 210 (27.10)                                   | 238 (17.41)                                   | 1229 (24.00)                |
| Coronary heart disease <sup>3</sup>             | 547 (11.06)                    | 201 (13.07)                                     | 155 (12.24)                                   | 126 (16.26)                                   | 65 (4.75)                                     | 627 (12.25)                 |
| Race                                            |                                |                                                 |                                               |                                               |                                               |                             |

|                                                     |                  |                  |                  |                  |                  |                  |
|-----------------------------------------------------|------------------|------------------|------------------|------------------|------------------|------------------|
| White                                               | 3093 (62.54)     | 979 (67.55)      | 751 (56.80)      | 365 (47.70)      | 998 (71.92)      | 3199 (62.49)     |
| Other                                               | 1853 (37.46)     | 559 (32.45)      | 515 (43.20)      | 410 (52.30)      | 369 (28.08)      | 1920 (37.50)     |
| Gender                                              |                  |                  |                  |                  |                  |                  |
| Female                                              | 1903 (38.48)     | 557 (37.97)      | 498 (39.40)      | 354 (47.70)      | 494 (32.09)      | 1966 (38.41)     |
| Male                                                | 3043 (61.52)     | 981 (62.03)      | 768 (60.60)      | 421 (52.30)      | 873 (67.91)      | 3153 (61.59)     |
| Blood pressure arm                                  |                  |                  |                  |                  |                  |                  |
| Intensive BP                                        | 1128 (22.81)     | 352 (22.89)      | 275 (21.72)      | 203 (26.19)      | 298 (21.80)      | 1183 (23.11)     |
| Lipid Fibrate                                       | 1323 (26.75)     | 410 (26.66)      | 357 (28.20)      | 179 (23.10)      | 377 (27.58)      | 1390 (27.15)     |
| Lipid Placebo                                       | 1340 (27.09)     | 427 (27.76)      | 315 (24.88)      | 193 (24.90)      | 405 (29.63)      | 1369 (26.74)     |
| Standard BP                                         | 1155 (23.25)     | 349 (22.60)      | 319 (25.20)      | 200 (25.81)      | 287 (20.99)      | 1177 (23.00)     |
| Baseline cardiovascular risk                        | 1751 (35.40)     | 527 (34.27)      | 473 (37.36)      | 330 (42.58)      | 421 (30.80)      | 1782 (34.81)     |
| Baseline HbA1c % (mean $\pm$ sd)                    | 8.27 $\pm$ 1.01  | 8.13 $\pm$ 0.94  | 8.34 $\pm$ 1.00  | 8.86 $\pm$ 0.99  | 8.04 $\pm$ 0.98  | 8.29 $\pm$ 1.00  |
| Baseline Age, years (mean $\pm$ sd)                 | 62.73 $\pm$ 6.63 | 63.23 $\pm$ 6.64 | 62.60 $\pm$ 6.57 | 61.97 $\pm$ 7.12 | 62.73 $\pm$ 6.33 | 62.72 $\pm$ 6.60 |
| Baseline years with diabetes, years (mean $\pm$ sd) | 10.71 $\pm$ 7.55 | 10.44 $\pm$ 7.37 | 11.45 $\pm$ 7.41 | 13.77 $\pm$ 8.14 | 8.58 $\pm$ 6.82  | 10.85 $\pm$ 7.60 |
| Baseline diabetes medications (insulin excluded)    |                  |                  |                  |                  |                  |                  |
| $\geq 1$                                            | 4127 (83.44)     | 1315 (85.50)     | 1092 (86.26)     | 585 (75.48)      | 1135 (83.02)     | 4248 (82.98)     |
| $\geq 2$                                            | 2495 (50.44)     | 851 (55.33)      | 713 (56.32)      | 352 (45.42)      | 579 (42.36)      | 2554 (49.89)     |
| $\geq 3$                                            | 546 (11.04)      | 206 (13.39)      | 170 (13.43)      | 59 (7.61)        | 111 (8.12)       | 557 (10.88)      |
| Baseline insulin                                    | 1686 (34.09)     | 465 (30.23)      | 472 (37.29)      | 458 (59.10)      | 291 (21.29)      | 1831 (35.77)     |

<sup>1</sup>MACE=major cardiovascular events and included cardiovascular death or first occurrence of a non-fatal heart attack or non-fatal stroke. Based on this definition, each individual can only have a single MACE event but will also be represented in the corresponding constituent outcomes (e.g., non-fatal stroke). <sup>2</sup> Death due to any cause.<sup>3</sup>Represents first events. <sup>4</sup>Fatal or first non-fatal stroke.

**Table S2: Clinical and demographic factors considered in analyses.**

|                                          |                                               |
|------------------------------------------|-----------------------------------------------|
| Demographic and Trial specific Variables | Baseline Age                                  |
|                                          | Sex                                           |
|                                          | Education                                     |
|                                          | Smoking status                                |
|                                          | Network                                       |
|                                          | Alcohol use                                   |
|                                          | Intensive blood pressure trial arm            |
|                                          | Fibrate trial arm                             |
| Medications                              | Loop diuretic                                 |
|                                          | Thiazide                                      |
|                                          | Potassium sparing diuretic                    |
|                                          | Potassium                                     |
|                                          | Angiotensin II receptor blockers              |
|                                          | Ace inhibitor                                 |
|                                          | Dihydropyridine-calcium channel blockers      |
|                                          | Non- Dihydropyridine-calcium channel blockers |
|                                          | Alpha Blocker                                 |
|                                          | Central agent                                 |
|                                          | Beta Blocker                                  |
|                                          | Vasodilator                                   |
|                                          | Reserpine                                     |
|                                          | Other blood pressure medication               |
|                                          | Digitalis                                     |
|                                          | Antiarrhythmic                                |

|                        |                                                                                |
|------------------------|--------------------------------------------------------------------------------|
|                        | Nitrate                                                                        |
|                        | Other cardiovascular medication                                                |
|                        | Sulfonylurea                                                                   |
|                        | Biguanide                                                                      |
|                        | Meglitinide                                                                    |
|                        | AG inhibitor                                                                   |
|                        | NPHL insulin                                                                   |
|                        | TZD                                                                            |
|                        | Regular insulin                                                                |
|                        | LA insulin                                                                     |
|                        | Other bolus insulin                                                            |
|                        | Premix insulin                                                                 |
|                        | LA and/or other bolus insulin                                                  |
|                        | NPHL, regular, and/or premix insulin                                           |
|                        | Any insulin use                                                                |
|                        | Other diabetes medication                                                      |
|                        | Bile sequestrant                                                               |
|                        | Statin                                                                         |
|                        | Fibrate                                                                        |
|                        | Other lipid medication                                                         |
|                        | Cholesterol ABI                                                                |
|                        | Niacin                                                                         |
|                        | Anti-coagulant                                                                 |
|                        | Anti-inflammatory                                                              |
|                        | Platelet AGI                                                                   |
|                        | Cox2                                                                           |
|                        | Aspirin                                                                        |
|                        | Thyroid medication                                                             |
|                        | Progestin                                                                      |
|                        | Estrogen                                                                       |
|                        | Oral asthma medication                                                         |
|                        | Anti-depressant                                                                |
|                        | Inhaled asthma medication                                                      |
|                        | Oral steroid                                                                   |
|                        | Anti-psychotic                                                                 |
|                        | Osteoporosis medication                                                        |
|                        | Fluid retention                                                                |
|                        | Other medication                                                               |
|                        | Vitamins                                                                       |
|                        | Over the counter medication                                                    |
|                        | Herbal                                                                         |
| Other Clinical Factors | Years with diabetes                                                            |
|                        | Years with dyslipidemia                                                        |
|                        | Hypertension                                                                   |
|                        | CVD history at baseline                                                        |
|                        | Micro or macro albuminuria with past 2 years                                   |
|                        | LVH by ECG or echocardiogram with past 2 years                                 |
|                        | ≥50% stenosis of coronary, carotid, or lower extremity artery in past 2 years. |
|                        | Eye disease                                                                    |
|                        | Neuropathology                                                                 |
|                        | Serum creatinine                                                               |
|                        | Glomerular filtration rate                                                     |
|                        | Diastolic blood pressure                                                       |
|                        | Systolic blood pressure                                                        |
|                        | Waist (cm)                                                                     |
|                        | BMI                                                                            |

**Table S3: Covariates selected in GWAS.**

| Covariate           | Beta   | Std. Error | z-value | p-value  |
|---------------------|--------|------------|---------|----------|
| PC1                 | -0.858 | 0.122      | -4.910  | 9.11E-07 |
| PC2                 | -0.293 | 0.060      | 1.895   | 0.058    |
| PC3                 | 0.108  | 0.064      | 1.247   | 0.213    |
| Sex                 | -0.344 | 0.107      | -3.219  | 0.001    |
| Years with Diabetes | -0.197 | 0.061      | -3.245  | 0.001    |
| BMI                 | 0.161  | 0.053      | 3063    | 0.002    |

|                             |        |       |        |          |
|-----------------------------|--------|-------|--------|----------|
| Baseline Sulfonylurea       | -0.505 | 0.106 | -4.750 | 2.04E-06 |
| Baseline Biguanide          | -0.396 | 0.103 | -3.838 | 1.24E-04 |
| Baseline Thiazolidinedione  | -0.442 | 0.129 | -3.429 | 6.07E-04 |
| Any Insulin Use at Baseline | -0.824 | 0.146 | -5.636 | 1.74E-08 |

### Pathway Analysis

Traditionally, pathway analysis has been used to identify common ontologies and/or biological associations from gene expression data. These ontologies may describe a gene-set with a common function or known biological pathways known to be affected by differential gene expression. The software package eXploring Genomic Relations (XGR) shifts this approach from the gene to the SNP-level.<sup>9</sup> XGR provides both an enrichment analysis and a functional interaction network analysis. The SNP-based enrichment analysis identifies enriched ontologies by comparing a user-defined set of variants, and XGR also incorporates information from SNPs which are in strong LD to the provided set. XGR SNP enrichment analysis takes advantage of the Gene Ontology's (GO) graph structure and controls for the overrepresentation in a GO term to avoid producing false-positive results<sup>10</sup>. Permutation testing is then used to determine statistical significance.

Network analysis was also performed using XGR to identify gene networks that may be impacted by the SNPs detected in the GWAS. First, a distance window ( $D$ ) of 50 Kb is placed around each input SNP. Those SNPs located within  $D$  and with an  $R^2 > 0.8$  to the input SNPs are then added to the list of input SNPs. The software then scores SNPs by taking the difference between their p-values and a genome-wide significance threshold ( $5 \times 10^{-8}$ ). The SNPs are then weighted by their  $R^2$  values. Next, genes are scored by their proximity to the listed SNPs, weighted by the SNP scores, based on the method described in Fang et al.<sup>9</sup>

SNP enrichment analysis was performed using XGR's SNP-based enrichment tool with both those SNPs that reached suggestive significant ( $p < 5.0 \times 10^{-6}$ ) in the GWAS and those used in the polygenic score (PS). Three ontology terms were significantly enriched (FDR  $p < 0.05$ ) for the suggestive significant SNPs in the GWAS: disposition ( $p < 5.0 \times 10^{-6}$ ), disease ( $p < 5.0 \times 10^{-6}$ ), and material property ( $p < 5.0 \times 10^{-6}$ ).

### Development of model for clinical group prediction

#### Polygenic Scores (PS)

Several approaches to constructing polygenic scores (PS) were investigated. In order to reduce correlation between significant variants, a "clumping" procedure was first performed to select the best variants from a list of all significant variants.<sup>11</sup> Here, all variants with a p-value less than a pre-defined threshold and not already within a clump are considered "index" SNPs.  $P$  value thresholds were taken from a sequence of length  $S$  iterating from the maximum to minimum GWAS p-value. A sliding window of  $D$  kb is then set around each index SNP in order to define LD blocks. All SNPs within the LD block with  $R^2$  value  $> r$  with the index SNP were selected. The most significant SNP within each LD block is then selected as the best "proxy" SNP and retained in the PS. The unique combination of  $p_1$ ,  $r$ ,  $D$ , and chromosome, the set of significant variants were weighted by their respective log odds ratio taken from the association tests. The sum of each weighted, significant variant then represents the CT-PS for each individual. An additional "stacked" approach, SCT-PS, was constructed using the workflow described in Prive, Aschard, and Blum<sup>12</sup> and the *bigsnpr* R package v1.3.0.<sup>13</sup> This procedure is similar to the CT-PS. The grid search implemented described above resulted in 32,200 unique PS values for each individual. With the SCT-PS procedure, a penalized regression was used to find the optimal combination of PS values to create a final SCT-PS, used for predictive modeling. The parameter values for constructing PS are shown in Table S4.

**Table S4. Parameter Values for Constructing the PS.**

| D (window size) | r ( $R^2$ Threshold) | S (number of unique p-value thresholds) |
|-----------------|----------------------|-----------------------------------------|
| 5000            | 0.01                 | 50                                      |
| 10000           | 0.01                 | 50                                      |
| 20000           | 0.01                 | 50                                      |
| 50000           | 0.01                 | 50                                      |
| 1000            | 0.05                 | 50                                      |
| 2000            | 0.05                 | 50                                      |
| 4000            | 0.05                 | 50                                      |
| 10000           | 0.05                 | 50                                      |



|      |      |    |
|------|------|----|
| 500  | 0.10 | 50 |
| 1000 | 0.10 | 50 |
| 2000 | 0.10 | 50 |
| 5000 | 0.10 | 50 |
| 250  | 0.20 | 50 |
| 500  | 0.20 | 50 |
| 1000 | 0.20 | 50 |
| 2500 | 0.20 | 50 |
| 100  | 0.50 | 50 |
| 200  | 0.50 | 50 |
| 400  | 0.50 | 50 |
| 1000 | 0.50 | 50 |
| 62   | 0.80 | 50 |
| 125  | 0.80 | 50 |
| 250  | 0.80 | 50 |
| 625  | 0.80 | 50 |
| 52   | 0.95 | 50 |
| 105  | 0.95 | 50 |
| 210  | 0.95 | 50 |
| 526  | 0.95 | 50 |

### Model training

The CT-PS and SCT-PS with and without baseline clinical variables were used to construct multiple models in order to evaluate which approach performed best to predict individual clinical group membership. The cohort randomized to receive intensive glycemia treatment and that consented to genetic studies was divided into a training set (N=2,270) and a test set (N=1,169). A 10-fold cross-validation procedure was performed for each modeling approach to prevent overfitting on the training set. The baseline clinical variables and the pairwise interaction terms between the CT-PS and SCT-PS and each baseline clinical variables were included in the variable selection procedure using least absolute shrinkage and selection operator (LASSO) was used to select an optimal subset of the covariates for each model.<sup>14</sup> Selected variables were then used in a generalized linear model (GLM) with a logit link function (i.e, logistic regression). Each model was evaluated using CT/SCT-PS only, baseline clinical variables only, or the CT/SCT-PS and baseline clinical variables. Model performance was assessed based on the area under the receiver operating characteristic curve (AUC), sensitivity, specificity, positive predictive value (PPV), negative predictive value (NPV), and balanced accuracy. PPV is the ratio of true positives out of all identified positives. NPV is the ratio of true negatives out of all identified negatives.

### **Assessment of model for clinical group prediction**

#### Propensity Score Matching

Propensity Score Matching is a method to adjust for confounding effects across treatment groups or studies.<sup>15</sup> Here, we used propensity score matching to adjust for age, sex, race, and years since a T2D diagnosis. All matching was conducted using the R package, *MatchIt* v3.0.2.<sup>16</sup> First, the pairwise distances, based on the adjusting variables, between each individual and each individual in the other cluster were calculated. Next, each individual was paired with its nearest neighbor, if not already chosen. The matched pairs then represented the matched subset. This process resulted in 2,060 individuals which were then split into a training and test set of 1,368 and 692 individuals each. A GLM using both the SCT-PS and clinical variables chosen in the full model was trained on the matched training set and then predicted the match test set .

#### Effect of sample size adjustment on observed risk differences

The SCT-PS only and SCT-PS with clinical features were considered the best models for predicting C4 based on performance and model parsimony (Table S12). These models were applied to the intensive arm test set (N=1,169, 33%) and standard arm (N=5,119, 100%) to determine if individuals predicted to be in the C4 subtype demonstrated a reduction in CVD risk between glycemia treatment arms. Because models were applied to only the withheld test set in the intensive arm (N=1,169, 33%) and the complete standard arm (N=5,119, 100%), the number of predicted C4 individuals in the standard arm (N=1,532) was nearly four times that of the predicted C4 in the intensive arm

(N=389). To determine the whether the sample size imbalance led to a bias in the observed risk differences, meta-analyzed risk was calculated for 20 iterations of various sample sizes.

### **Direct Prediction of CVD Outcomes**

In order to compare the efficacy of predicting cluster membership as a proxy for risk of an adverse outcome compared to predicting CVD outcomes directly, SCT-PS model with baseline clinical variables and a GLM of only baseline clinical values were assessed to determine if they could be trained to predict MACE and total mortality.

### **Comparison to 2-SNP Genetic Risk Score (GRS) from Shah et al.**

We previously published a genetic risk score (GRS) consisting of two SNPs, rs9299870 and rs57922, that demonstrated predictivity for risk of cardiovascular mortality and displayed an interaction with glycemic control in ACCORD.<sup>17</sup> These findings were replicated in two different cohorts, suggesting that this approach may be useful for identifying patients likely to be harmed or likely to benefit from intensive glycemia treatment.

Here, we take a fundamentally different approach to identify distinct groups with different glycemic responses to intensive glycemia treatment in ACCORD. We then demonstrate that these groups have modified risk of adverse outcomes (Figs 2,4). Next, we constructed a PS, using a new SCT-PS approach, to predict membership in C4, a group with reduced risk risk of adverse outcomes in the intensive glycemia arm. We then demonstrate evidence of a causal relationship between the SCT-PS, median HbA1c, and CVD risk using Mendelian randomization (Fig. S14). In addition the predicted C4 from the SCT-PS that received intensive glycemia treatment displayed benefit over predicted C4 receiving standard glycemia treatment (Fig. 4A). We then sought to compare the performance of the SCT-PS model developed here, with the 2-SNP GRS presented in Shah et al across all race and across individuals self identified as White (GRS=0).<sup>17</sup> Here, to compare different scores, we applied the models across all individuals in the discovery and test sets. However, the hazard ratios for the SCT-PS were similar between these results and the test set, reducing concerns of overfitting. In addition, due to different QC approaches during the merging of the two genotype platforms (see: “Genotyping Array and Quality Control”, above), in the comparison of White individuals presented below (Fig. S20), the cohort here had 196 fewer individuals than the original Shah et al. paper, resulting in slight discrepancies between the two analyses.

## Supplemental Results

### Clustering

#### Aggregated trajectories for clusters

After identifying the optimized number of clinical groups (see main text), representative composite HbA1c trajectories were created for each clinical group by averaging all individual HbA1c trajectories within the respective cluster (Fig. 2A). Variability of underlying clinical group can be seen in Figs. S1-S2.

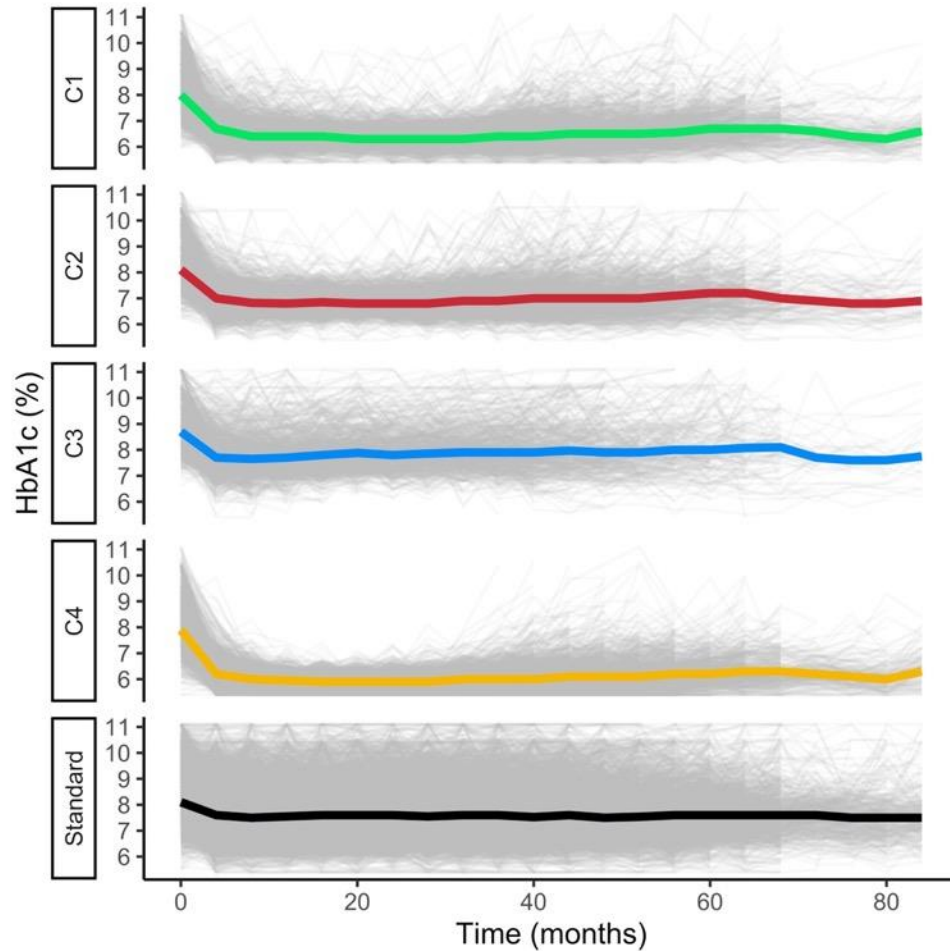

**Figure S1. Individual HbA1c trajectories for intensive clinical groups and standard arm**

Mean HbA1c (%) trajectories are shown for the clinical groups and the standard arm with constituent trajectories in the background.

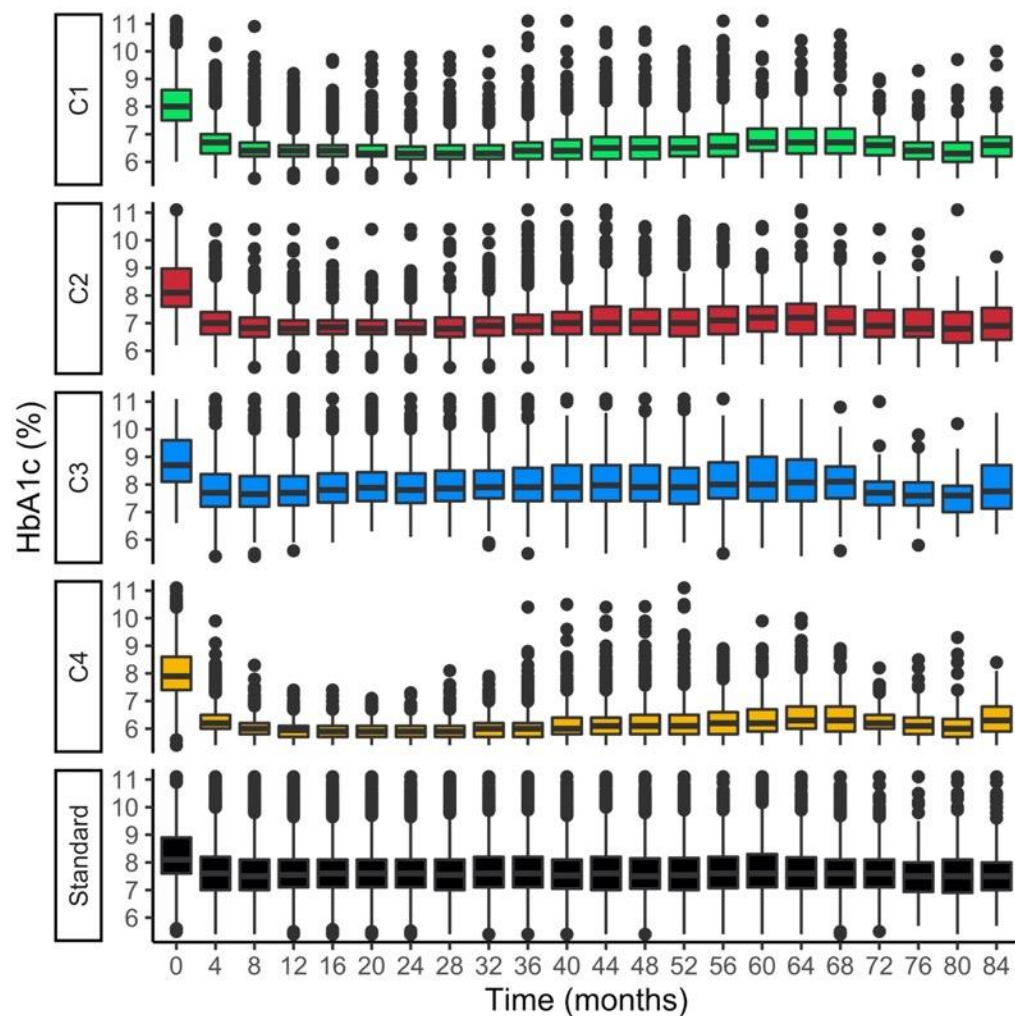

**Figure S2. HbA1c distribution across time for intensive clinical groups and standard arm**

Each boxplot presents the distribution of HbA1c (%) observed in the clinical groups and the standard arm at a specific point in time.

Distribution of baseline HbA1c seen in clusters

As reported in the main text, four clinical groups were identified with different incidence rates for adverse outcome. As seen in Figure S3, despite significant differences in HbA1c at baseline for the clinical groups and the standard arm ( $P < .05$ ), there is substantial overlap between the observed distributions.

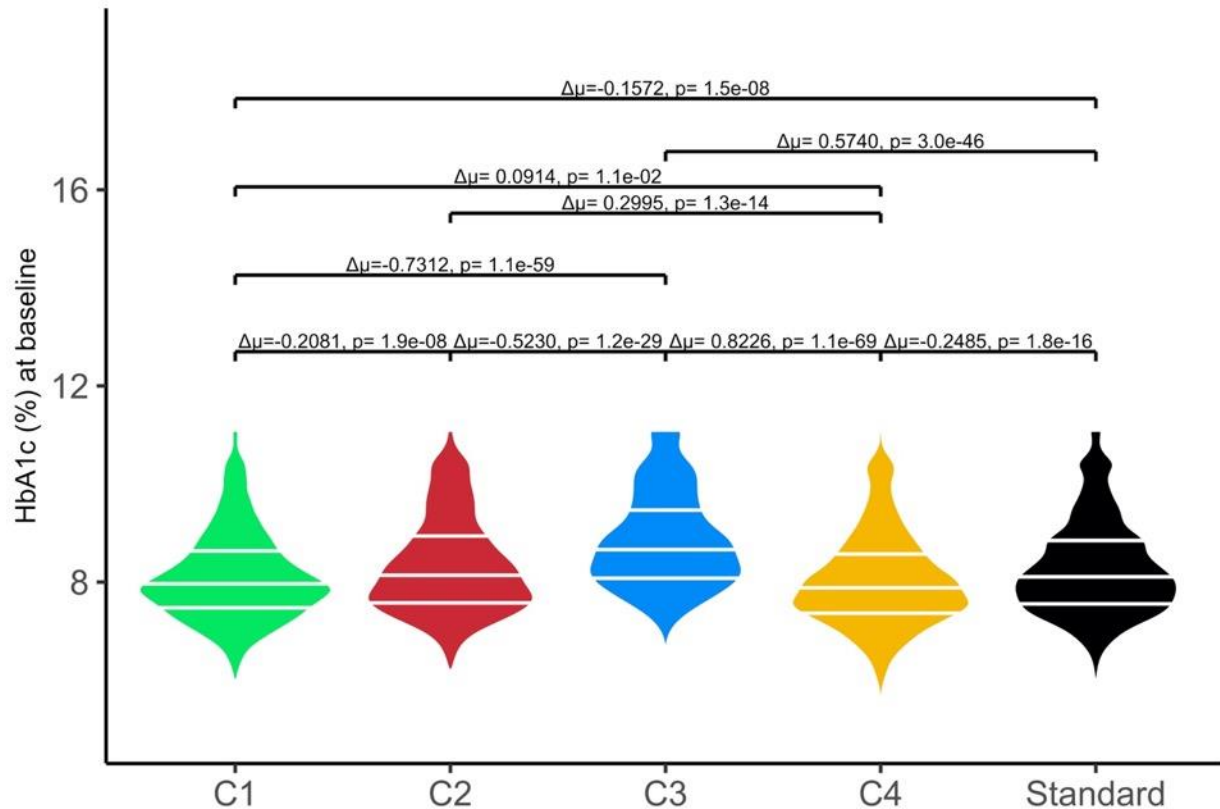

**Figure S3. HbA1c distribution for individuals in clinical groups and standard arm at baseline.**

HbA1c (%) differences between the clinical groups and the standard arm were compared using Student's t-test. Only significant mean differences ( $\Delta\mu$ ) are reported ( $P < .05$ ). As reported in the main text, four clinical groups were identified with different incidence rates for adverse outcome. Despite significant differences in HbA1c at baseline for the clinical groups and the standard arm ( $P < .05$ ), there is substantial overlap between the observed distributions.

#### Permutation testing for composite trajectory representation

Composite trajectories were tested for how well they represented their underlying HbA1c trajectories using permutation testing, as described in the main text. HbA1c composite trajectories for C1, C2 and C4 were significantly representative of the underlying values ( $P \leq .0001$ ) (Figure S4 A, B, D). However, the composite trajectory for C3 was not significantly different from randomly selected trajectories ( $P > .0001$ ), indicating increased HbA1c variability in this group (Figure S4C). The results also suggest that C1, C2, C4 are distinct clinical groups, C3 represents patients that were the most different from other clinical groups, but not necessarily similar to each other.

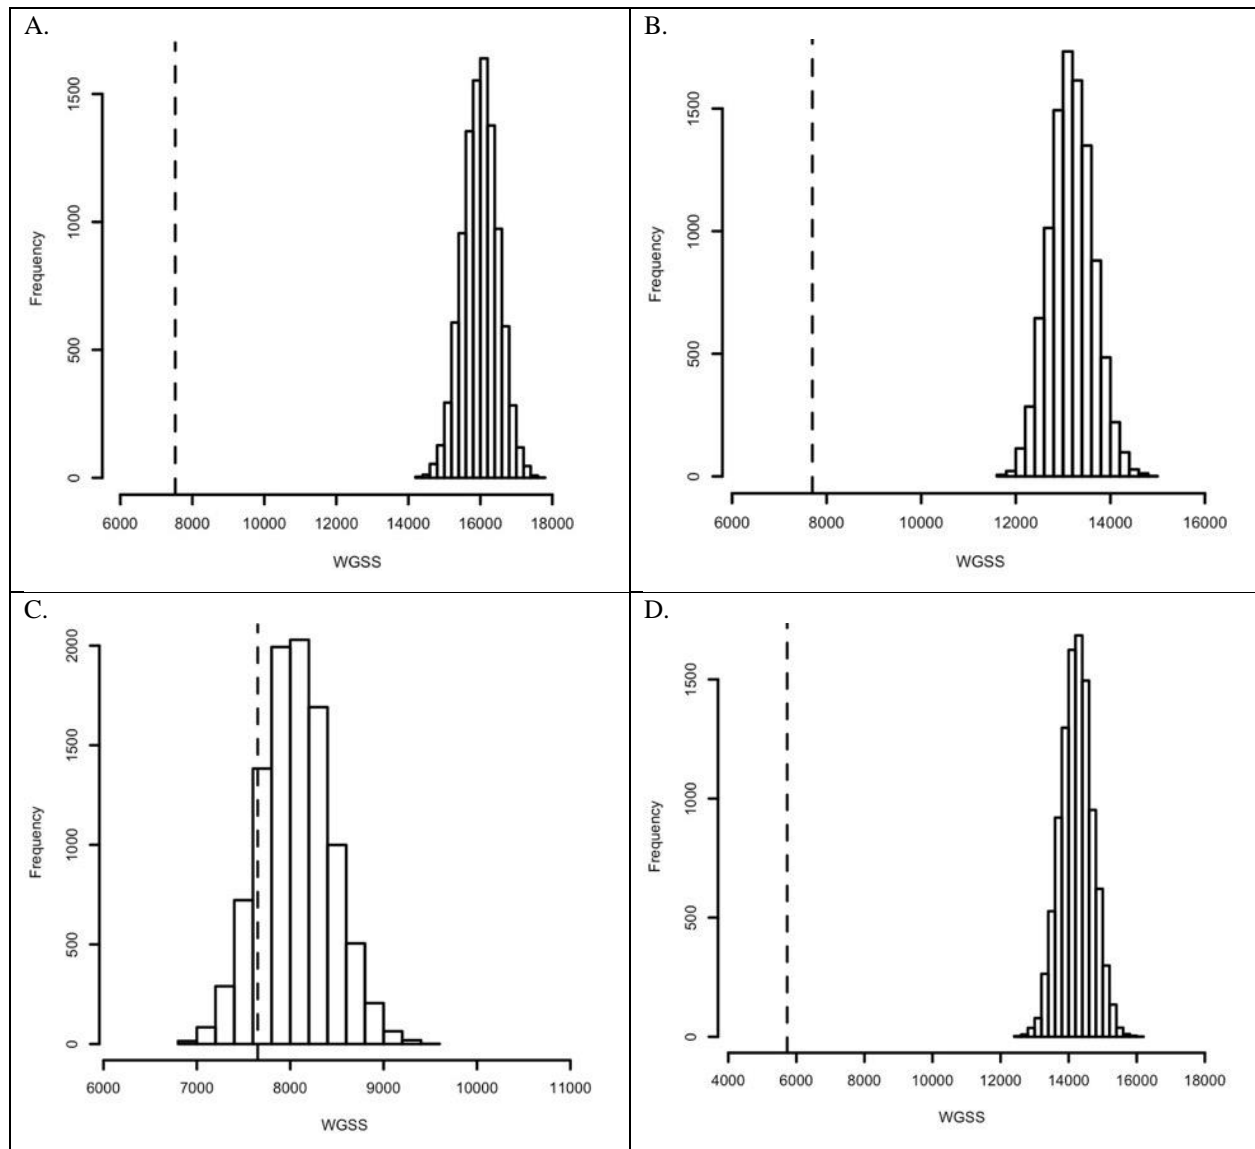

**Fig S4. Permutated within group sum of squares (WGSS) distributions.**

Composite trajectories were tested for how well they represented their underlying HbA1c trajectories using permutation testing, as described in the main text. For each clinical group, (A) C1, (B) C2, (C) C3 and (D) C4 the distributions of within group sum of squares (WGSS) were computed between the composite trajectory and 10,000 equally sized and random subsets of HbA1c trajectories. The dashed lines represent the actual WGSS between member trajectories of the clinical groups and their respective composite trajectories. A dashed line that overlaps less than 5% of the distribution indicates that the composite trajectory is significantly more representative of the trajectories in that clinical group than would be expected by chance. WGSS distributions for C1, C2, and C4 were statistically significant with  $P \leq .0001$ .

#### **Risk of outcomes in clinical groups compared to standard treatment.**

##### Risks of microvascular events between HbA1c clusters

The C4 cluster demonstrated reduced risk of all evaluated microvascular outcomes (HR=0.86,  $P=0.0152$ ) while elevated risk was observed for both C2 (HR=1.16,  $P=0.023$ ) and C3 (HR=1.30,  $P<0.0001$ ) (Fig. S5).

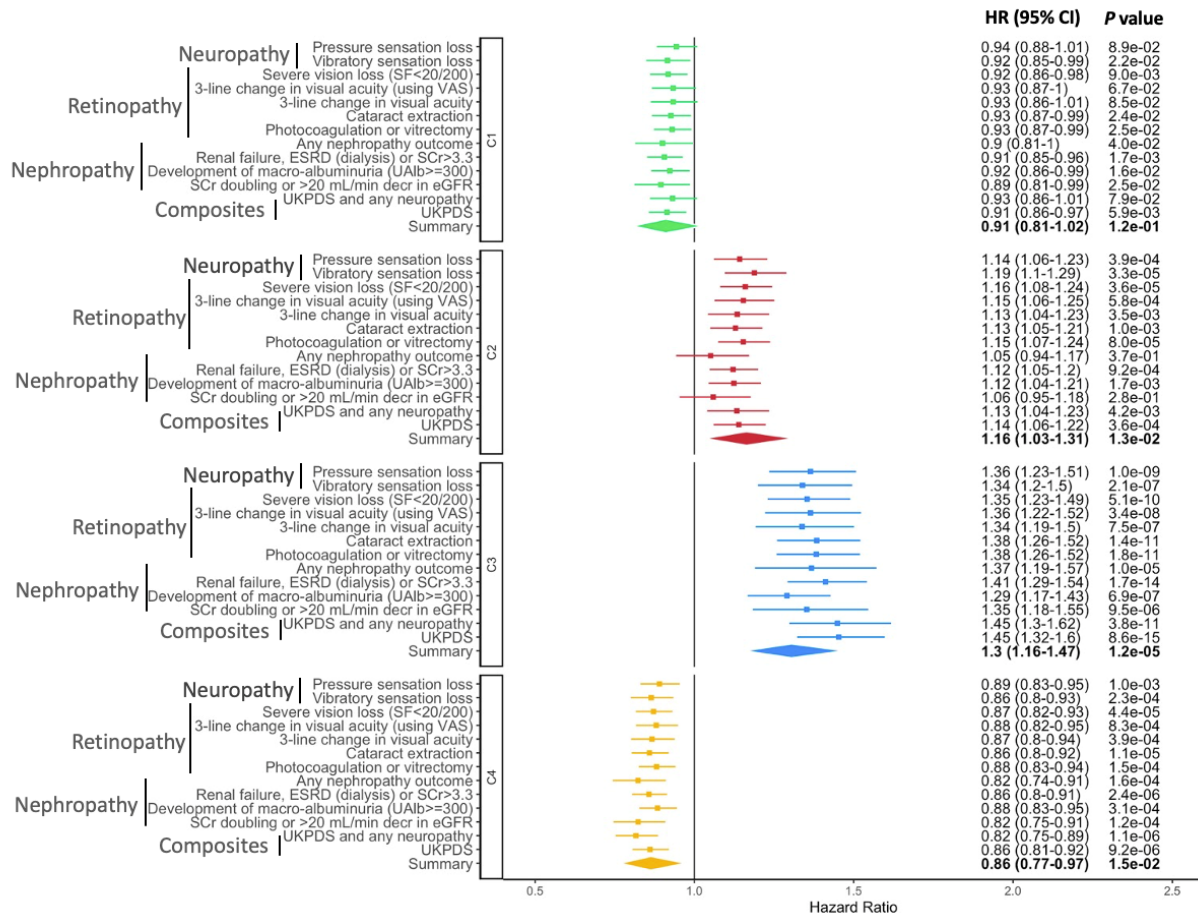

**Fig S5. Risk of microvascular outcomes in clinical groups compared to standard treatment.**

Cox proportional hazards models were used to calculate the risk of outcomes in all clinical groups compared to standard treatment group. Overall risk of microvascular outcomes was calculated using *R metafor package* after adjusting for covariance of all outcomes. In the plot, SF, VAS, ESRD, SCr, UAlb, eGFR and UKPDS are abbreviations for Snellen fraction, visual acuity scale, end-stage renal disease, serum creatinine, urine albumin, estimate glomerular filtration rate and UKPDS composite (i.e. retinopathy requiring photocoagulation, vitreous hemorrhage and renal failure), respectively.

#### Risks of hypoglycemia between HbA1c clusters

All intensive arm clinical groups had a significantly increased risk of both severe and any hypoglycemic event than individuals in the standard arm ( $q < 0.05$ ) (Figure S6). Although C4 had significantly reduced risks for CVD events (Figure 3, main text) (meta-analyzed  $HR=0.52$ ,  $P=1.47 \times 10^{-69}$ ), these individuals still had elevated risks of having any hypoglycemic event ( $HR=2.18$ ,  $P=3.5 \times 10^{-18}$ ) or a severe hypoglycemic event ( $HR=1.89$ ,  $P=1.3 \times 10^{-8}$ ) (Fig. S6A). This suggests that although intensive glycemia treatment increased risk of hypoglycemia, this was not the driver of the observed increased risk of CVD related outcomes in the intensive arm. Notably, individuals in C3, which had increased risk of CVD related outcomes compared to standard treatment, that experienced hypoglycemic events had any hypoglycemic event on average 0.92 years and for severe hypoglycemia, 1.02 years earlier than individuals in standard arm ( $q < 0.0001$ ) (Fig. S6B-C). Of the individuals that experienced a hypoglycemic event in the C4 intensive treatment group and those receiving standard treatment, there were no significant differences observed between the time to their first hypoglycemic event ( $q > 0.05$ ).

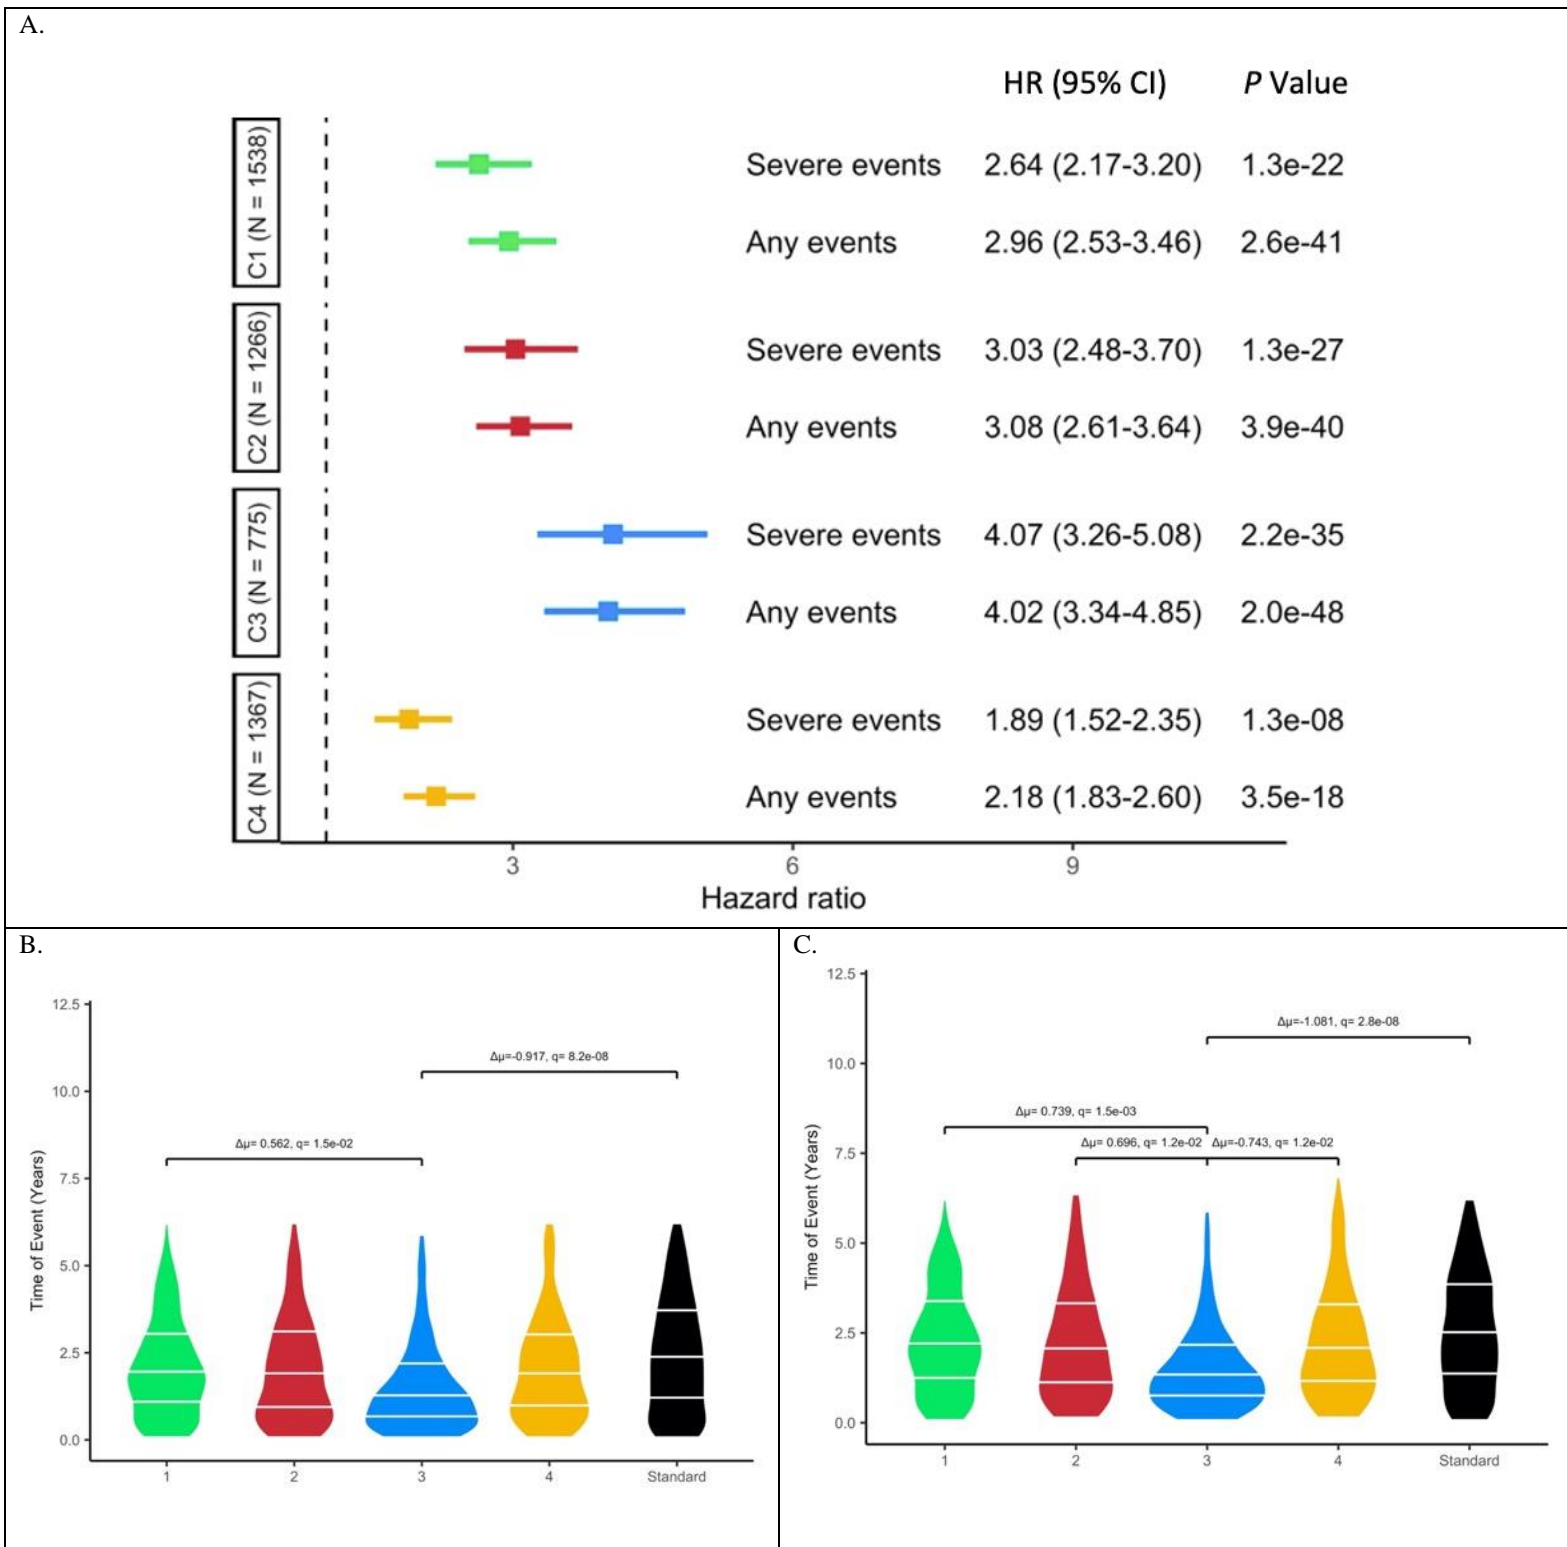

**Figure S6. Risks of hypoglycemia between HbA1c clusters.**

Cox proportional hazards models were used to evaluate the time-to-event for hypoglycemia for each cluster and the standard arm. In only those individuals that experienced a hypoglycemic event, a separate analysis was performed using a Student's t-test to compare the mean time to either a hypoglycemic or severe hypoglycemic



event. All tests were adjusted for multiple comparisons using an FDR approach.<sup>18</sup> (A) Hazard ratios (HR) for etwDTW HbA1c clinical groups for time to any hypoglycemic event and severe hypoglycemic events compared to standard arm were computed using Cox proportional hazards models. (B) Distribution of time to first hypoglycemic events and (C) severe hypoglycemic events in individuals that had at least one hypoglycemic event. ' $\Delta\mu$ ' represents the mean time difference. ' $q$ ' is the FDR adjusted  $P$  value obtained from respective pairwise comparisons using Student's  $t$ -test.

### Comparison of risk outcomes based on rudimentary binning of HbA1c trajectories

#### Outcome risk categorization based on median HbA1c quartiles within 1 year of baseline

To evaluate whether etwDTW clustering of HbA1c trajectories provided additional value compared to stratification by early quartiles of HbA1c, individuals were categorized into four groups based on only on median HbA1c quartiles observed within the first year. The composite HbA1c trajectories for these quartiles are shown in Fig. S7A. This method of classification did identify individuals with reduced risk of MACE (Fig. S7B), but failed to identify a group of individuals within the intensive arm with significantly lower risk for total mortality (Fig. S7C).

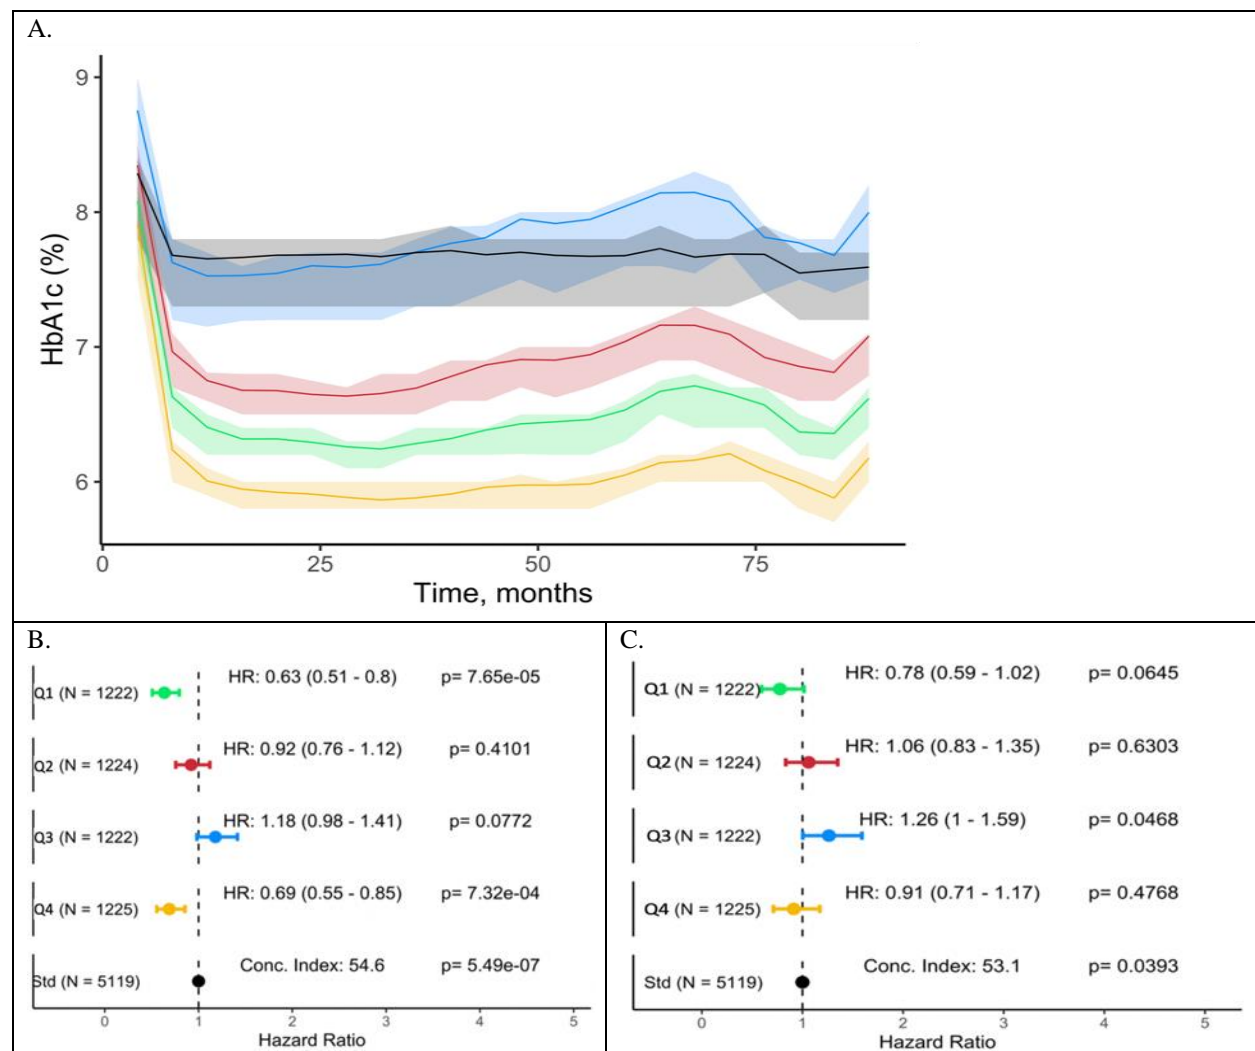

**Figure S7. Classification using median HbA1c quartiles within first year of baseline.**

To evaluate whether etwDTW clustering of HbA1c trajectories provided additional value compared to stratification by early quartiles of HbA1c, individuals were categorized into four groups based on only on median HbA1c quartiles observed within the first year. (A) Mean composite HbA1c trajectories with standard errors representing underlying quartiles are shown in Panel A for each median HbA1c. (B) Hazard ratios (HR) for MACE for each

quartile and (C) total mortality for each quartile are shown compared to standard treatment. These HR were calculated for each quartile using Cox proportional hazards models with the standard arm as reference.

#### Outcome risk categorization based on median HbA1c quartiles across the entire trajectory

Individuals within the intensive arm were also categorized into four groups using median HbA1c quartiles across the entire trajectory. For this comparison, baseline HbA1c values were excluded. Similar to categorization using baseline HbA1c quartiles (Fig. S7A), this approach identified individuals with reduced risk of MACE (Fig. S8B), but failed to identify a group of individuals within the intensive arm with significantly lower risk for total mortality (Fig. S8C), compared to individuals in the standard glycemia treatment arm.

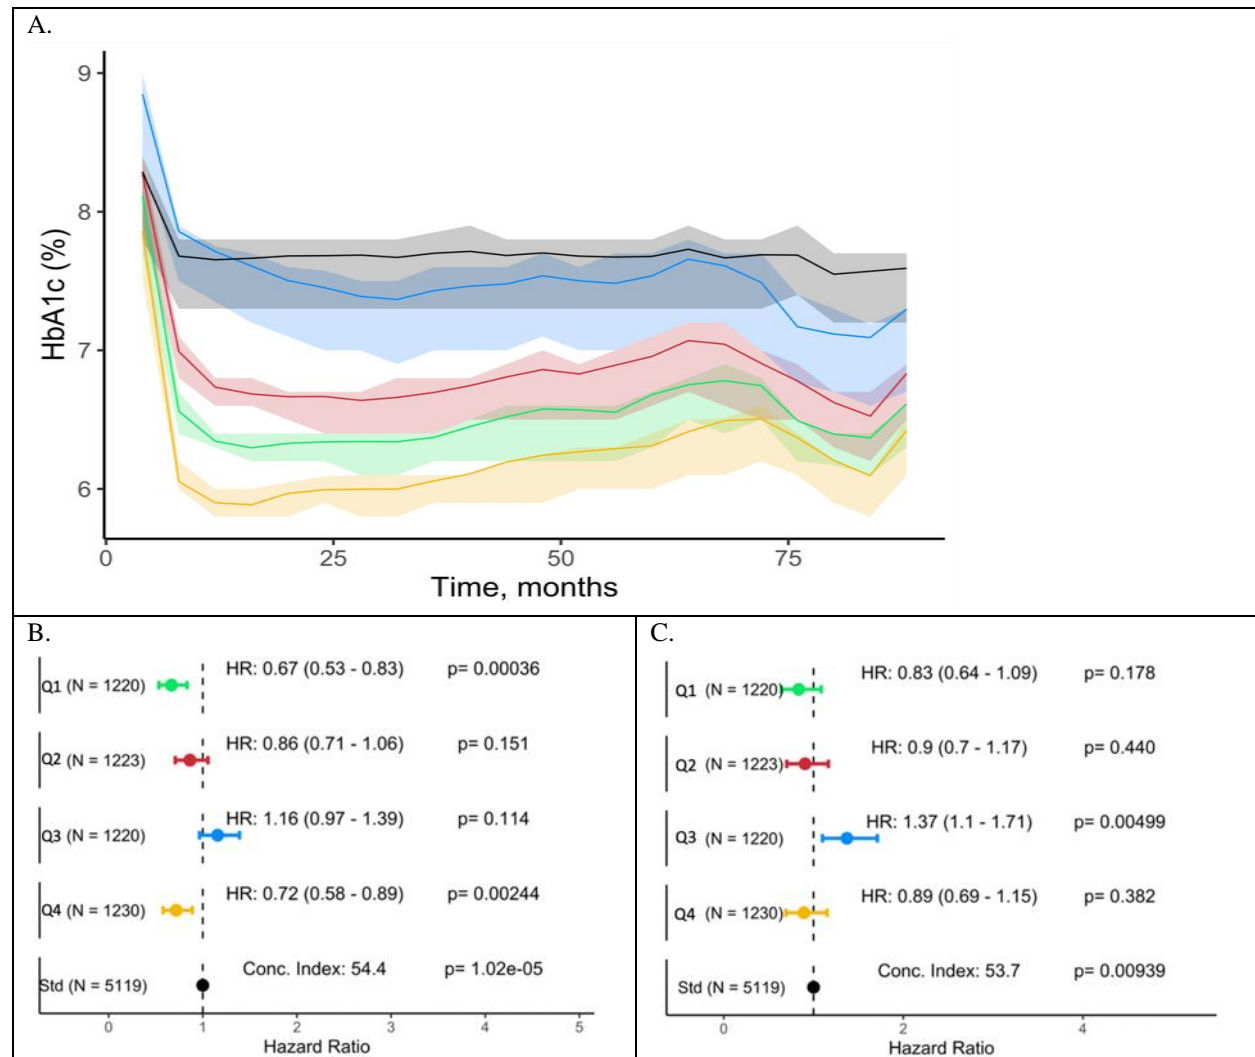

**Figure S8. Classification using median HbA1c quartiles across entire HbA1c after baseline measurements.**

Individuals within the intensive arm were also categorized into four groups using median HbA1c quartiles across the entire trajectory. For this comparison, baseline HbA1c values were excluded. (A) Mean composite HbA1c trajectories with standard errors representing underlying quartiles are shown in Panel A for each median HbA1c. (B) Hazard ratios (HR) for MACE for each quartile and (C) total mortality for each quartile are shown compared to standard treatment. These HR were calculated for each quartile using Cox proportional hazards models with the standard arm as reference.

### Baseline clinical and demographic differences between HbA1c clinical groups

Significant differences ( $q < 0.01$ ) for medications, medications adjusted with duration of T2D, and clinical and demographic differences are reported in Tables S5-S8.

**Table S5. Baseline medication differences between clinical groups ( $q < 0.01$ )**

| Variable                                            | Group 1 | Group 2 | Proportion or Mean in group 1 | Proportion or Mean in group 2 | Odds Ratio or Mean Difference | P value  | q-value  |
|-----------------------------------------------------|---------|---------|-------------------------------|-------------------------------|-------------------------------|----------|----------|
| Ace inhibitors                                      | C2      | C4      | 57.5                          | 51.39                         | 0.781 (0.67-0.911)            | 1.68e-03 | 6.69e-03 |
| if any insulin                                      | C3      | C1      | 59.1                          | 30.23                         | 3.334 (2.787-3.994)           | 2.45e-39 | 9.37e-38 |
| if any insulin                                      | C2      | C1      | 37.28                         | 30.23                         | 1.372 (1.172-1.606)           | 8.41e-05 | 4.33e-04 |
| if any insulin                                      | C3      | C4      | 59.1                          | 21.29                         | 0.187 (0.154-0.227)           | 6.88e-65 | 6.57e-63 |
| if any insulin                                      | C2      | C4      | 37.28                         | 21.29                         | 0.455 (0.383-0.54)            | 3.56e-19 | 6.80e-18 |
| if any insulin                                      | C1      | C4      | 30.23                         | 21.29                         | 0.624 (0.527-0.739)           | 4.67e-08 | 4.06e-07 |
| if any insulin                                      | C2      | C3      | 37.28                         | 59.1                          | 2.43 (2.025-2.92)             | 1.86e-21 | 4.45e-20 |
| Beta-blockers                                       | C2      | C4      | 30.73                         | 25.29                         | 0.763 (0.643-0.905)           | 1.93e-03 | 7.54e-03 |
| Beta-blockers                                       | C3      | C4      | 35.06                         | 25.29                         | 0.627 (0.518-0.76)            | 1.83e-06 | 1.25e-05 |
| Biguanides                                          | C3      | C1      | 58.97                         | 65.8                          | 0.747 (0.625-0.892)           | 1.29e-03 | 5.37e-03 |
| Biguanides                                          | C2      | C3      | 68.25                         | 58.97                         | 0.669 (0.555-0.805)           | 2.16e-05 | 1.25e-04 |
| Biguanides                                          | C2      | C4      | 68.25                         | 60.86                         | 0.724 (0.616-0.849)           | 7.87e-05 | 4.18e-04 |
| Lispro or Aspart Insulins                           | C3      | C1      | 16.65                         | 6.44                          | 2.903 (2.201-3.839)           | 5.61e-14 | 6.70e-13 |
| Lispro or Aspart Insulins                           | C3      | C4      | 16.65                         | 5.19                          | 0.274 (0.201-0.371)           | 8.67e-17 | 1.27e-15 |
| Lispro or Aspart Insulins                           | C2      | C3      | 9.08                          | 16.65                         | 1.999 (1.527-2.618)           | 4.61e-07 | 3.39e-06 |
| Lispro or Aspart Insulins                           | C2      | C4      | 9.08                          | 5.19                          | 0.548 (0.402-0.743)           | 1.20e-04 | 5.90e-04 |
| either othbol_insulin or la_insulin                 | C3      | C1      | 17.81                         | 7.28                          | 2.758 (2.115-3.604)           | 7.99e-14 | 8.98e-13 |
| either othbol_insulin or la_insulin                 | C2      | C3      | 9.72                          | 17.81                         | 2.013 (1.55-2.617)            | 1.59e-07 | 1.27e-06 |
| either othbol_insulin or la_insulin                 | C3      | C4      | 17.81                         | 6                             | 0.295 (0.22-0.392)            | 1.23e-16 | 1.68e-15 |
| either othbol_insulin or la_insulin                 | C2      | C4      | 9.72                          | 6                             | 0.593 (0.442-0.791)           | 4.23e-04 | 1.88e-03 |
| Loop diuretics                                      | C3      | C1      | 12.94                         | 8.34                          | 1.632 (1.235-2.152)           | 5.34e-04 | 2.32e-03 |
| Loop diuretics                                      | C3      | C4      | 12.94                         | 6.6                           | 0.475 (0.352-0.641)           | 1.16e-06 | 8.20e-06 |
| Nitrates                                            | C2      | C4      | 6.24                          | 3.53                          | 0.549 (0.378-0.79)            | 1.38e-03 | 5.62e-03 |
| Nitrates                                            | C3      | C4      | 6.87                          | 3.53                          | 0.495 (0.331-0.74)            | 5.93e-04 | 2.52e-03 |
| NPH or L Insulins                                   | C3      | C1      | 54.19                         | 26.46                         | 3.288 (2.744-3.943)           | 5.85e-38 | 1.86e-36 |
| NPH or L Insulins                                   | C2      | C3      | 34.2                          | 54.19                         | 2.276 (1.896-2.734)           | 1.21e-18 | 1.93e-17 |
| NPH or L Insulins                                   | C3      | C4      | 54.19                         | 18.29                         | 0.189 (0.155-0.23)            | 1.08e-61 | 6.86e-60 |
| NPH or L Insulins                                   | C2      | C1      | 34.2                          | 26.46                         | 1.444 (1.228-1.699)           | 8.87e-06 | 5.47e-05 |
| NPH or L Insulins                                   | C2      | C4      | 34.2                          | 18.29                         | 0.431 (0.359-0.515)           | 3.89e-20 | 8.25e-19 |
| NPH or L Insulins                                   | C1      | C4      | 26.46                         | 18.29                         | 0.622 (0.52-0.742)            | 1.67e-07 | 1.28e-06 |
| either nphl_insulin, reg_insulin, or premix_insulin | C3      | C1      | 59.1                          | 30.17                         | 3.344 (2.795-4.006)           | 1.64e-39 | 7.81e-38 |
| either nphl_insulin, reg_insulin, or premix_insulin | C2      | C1      | 37.2                          | 30.17                         | 1.371 (1.171-1.606)           | 8.61e-05 | 4.33e-04 |
| either nphl_insulin, reg_insulin, or premix_insulin | C2      | C3      | 37.2                          | 59.1                          | 2.439 (2.032-2.93)            | 1.34e-21 | 3.64e-20 |
| either nphl_insulin, reg_insulin, or premix_insulin | C3      | C4      | 59.1                          | 21.29                         | 0.187 (0.154-0.227)           | 6.88e-65 | 6.57e-63 |
| either nphl_insulin, reg_insulin, or premix_insulin | C1      | C4      | 30.17                         | 21.29                         | 0.626 (0.528-0.741)           | 5.76e-08 | 4.78e-07 |
| either nphl_insulin, reg_insulin, or premix_insulin | C2      | C4      | 37.2                          | 21.29                         | 0.456 (0.384-0.542)           | 5.12e-19 | 8.88e-18 |
| Premixed Insulins                                   | C3      | C1      | 16.13                         | 9.62                          | 1.806 (1.397-2.331)           | 5.84e-06 | 3.72e-05 |
| Premixed Insulins                                   | C3      | C4      | 16.13                         | 8.19                          | 0.464 (0.353-0.609)           | 3.18e-08 | 2.89e-07 |
| Premixed Insulins                                   | C2      | C3      | 10.66                         | 16.13                         | 1.611 (1.239-2.093)           | 3.55e-04 | 1.65e-03 |
| Regular Insulins                                    | C2      | C4      | 11.45                         | 7.39                          | 0.617 (0.472-0.804)           | 3.78e-04 | 1.72e-03 |
| Regular Insulins                                    | C2      | C3      | 11.45                         | 19.1                          | 1.825 (1.423-2.342)           | 2.19e-06 | 1.45e-05 |
| Regular Insulins                                    | C3      | C4      | 19.1                          | 7.39                          | 0.338 (0.257-0.442)           | 3.81e-15 | 4.86e-14 |

| Variable           | Group 1 | Group 2 | Proportion or Mean in group 1 | Proportion or Mean in group 2 | Odds Ratio or Mean Difference | P value  | q-value  |
|--------------------|---------|---------|-------------------------------|-------------------------------|-------------------------------|----------|----------|
| Regular Insulins   | C3      | C1      | 19.1                          | 9.69                          | 2.2 (1.72-2.816)              | 3.44e-10 | 3.46e-09 |
| Sulfonylureas      | C1      | C4      | 58.84                         | 50.69                         | 0.719 (0.621-0.833)           | 1.08e-05 | 6.44e-05 |
| Sulfonylureas      | C2      | C3      | 58.69                         | 44.39                         | 0.562 (0.469-0.673)           | 3.86e-10 | 3.69e-09 |
| Sulfonylureas      | C3      | C1      | 44.39                         | 58.84                         | 0.558 (0.469-0.664)           | 5.62e-11 | 5.96e-10 |
| Sulfonylureas      | C2      | C4      | 58.69                         | 50.69                         | 0.724 (0.62-0.844)            | 3.94e-05 | 2.15e-04 |
| Thiazolidinediones | C2      | C4      | 24.01                         | 18.14                         | 0.701 (0.581-0.847)           | 2.26e-04 | 1.08e-03 |
| Thiazolidinediones | C1      | C4      | 24.64                         | 18.14                         | 0.678 (0.566-0.811)           | 2.26e-05 | 1.27e-04 |

**Table S6. Baseline medication differences between clinical groups after adjusting for years with type 2 diabetes (q<0.01).**

| Variable                                            | Group 1 | Group 2 | Proportion or Mean in group 1 | Proportion or Mean in group 2 | Odds Ratio or Mean Difference | P value  | q-value  |
|-----------------------------------------------------|---------|---------|-------------------------------|-------------------------------|-------------------------------|----------|----------|
| if any insulin                                      | C3      | C4      | 59.1                          | 21.29                         | 0.266 (0.216-0.328)           | 1.41e-35 | 1.73e-34 |
| if any insulin                                      | C1      | C4      | 30.23                         | 21.29                         | 0.749 (0.622-0.9)             | 2.05e-03 | 3.57e-03 |
| if any insulin                                      | C3      | C1      | 59.1                          | 30.23                         | 2.749 (2.263-3.344)           | 3.18e-24 | 3.58e-23 |
| if any insulin                                      | C2      | C4      | 37.28                         | 21.29                         | 0.583 (0.484-0.702)           | 1.31e-08 | 3.16e-08 |
| if any insulin                                      | C2      | C3      | 37.28                         | 59.1                          | 2.165 (1.781-2.633)           | 9.53e-15 | 3.71e-14 |
| Beta-blockers                                       | C3      | C4      | 35.06                         | 25.29                         | 0.674 (0.55-0.826)            | 1.44e-04 | 2.98e-04 |
| Biguanides                                          | C2      | C4      | 68.25                         | 60.86                         | 0.722 (0.612-0.851)           | 1.07e-04 | 2.23e-04 |
| Biguanides                                          | C1      | C4      | 65.8                          | 60.86                         | 0.8 (0.687-0.933)             | 4.47e-03 | 7.56e-03 |
| Biguanides                                          | C2      | C3      | 68.25                         | 58.97                         | 0.714 (0.591-0.864)           | 5.07e-04 | 9.41e-04 |
| Lispro or Aspart Insulins                           | C3      | C1      | 16.65                         | 6.44                          | 2.249 (1.686-3.007)           | 3.81e-08 | 8.93e-08 |
| Lispro or Aspart Insulins                           | C3      | C4      | 16.65                         | 5.19                          | 0.422 (0.304-0.581)           | 1.63e-07 | 3.71e-07 |
| Lispro or Aspart Insulins                           | C2      | C3      | 9.08                          | 16.65                         | 1.76 (1.335-2.321)            | 6.09e-05 | 1.29e-04 |
| either othbol_insulin or la_insulin                 | C3      | C1      | 17.81                         | 7.28                          | 2.142 (1.625-2.829)           | 6.99e-08 | 1.61e-07 |
| either othbol_insulin or la_insulin                 | C2      | C3      | 9.72                          | 17.81                         | 1.767 (1.351-2.313)           | 3.30e-05 | 6.99e-05 |
| either othbol_insulin or la_insulin                 | C3      | C4      | 17.81                         | 6                             | 0.451 (0.331-0.612)           | 3.83e-07 | 8.46e-07 |
| Loop diuretics                                      | C3      | C4      | 12.94                         | 6.6                           | 0.566 (0.411-0.779)           | 4.84e-04 | 9.17e-04 |
| Nitrates                                            | C3      | C4      | 6.87                          | 3.53                          | 0.546 (0.356-0.837)           | 5.48e-03 | 9.23e-03 |
| NPH or L Insulins                                   | C3      | C1      | 54.19                         | 26.46                         | 2.702 (2.225-3.285)           | 1.43e-23 | 1.56e-22 |
| NPH or L Insulins                                   | C2      | C4      | 34.2                          | 18.29                         | 0.537 (0.444-0.65)            | 1.77e-10 | 4.44e-10 |
| NPH or L Insulins                                   | C3      | C4      | 54.19                         | 18.29                         | 0.269 (0.218-0.333)           | 4.84e-34 | 5.78e-33 |
| NPH or L Insulins                                   | C1      | C4      | 26.46                         | 18.29                         | 0.742 (0.613-0.897)           | 2.16e-03 | 3.75e-03 |
| NPH or L Insulins                                   | C2      | C3      | 34.2                          | 54.19                         | 2.003 (1.651-2.432)           | 1.94e-12 | 7.28e-12 |
| NPH or L Insulins                                   | C2      | C1      | 34.2                          | 26.46                         | 1.351 (1.137-1.606)           | 6.35e-04 | 1.14e-03 |
| either nphl_insulin, reg_insulin, or premix_insulin | C3      | C1      | 59.1                          | 30.17                         | 2.759 (2.271-3.356)           | 2.23e-24 | 2.58e-23 |
| either nphl_insulin, reg_insulin, or premix_insulin | C3      | C4      | 59.1                          | 21.29                         | 0.266 (0.216-0.328)           | 1.41e-35 | 1.73e-34 |
| either nphl_insulin, reg_insulin, or premix_insulin | C2      | C4      | 37.2                          | 21.29                         | 0.585 (0.486-0.704)           | 1.59e-08 | 3.80e-08 |
| either nphl_insulin, reg_insulin, or premix_insulin | C2      | C3      | 37.2                          | 59.1                          | 2.173 (1.788-2.644)           | 6.82e-15 | 2.69e-14 |
| either nphl_insulin, reg_insulin, or premix_insulin | C1      | C4      | 30.17                         | 21.29                         | 0.751 (0.625-0.903)           | 2.34e-03 | 4.05e-03 |
| Potassium supplements                               | C2      | C1      | 1.18                          | 2.8                           | 0.41 (0.219-0.725)            | 3.25e-03 | 5.60e-03 |
| Premixed Insulins                                   | C3      | C1      | 16.13                         | 9.62                          | 1.478 (1.133-1.923)           | 3.76e-03 | 6.40e-03 |
| Regular Insulins                                    | C3      | C4      | 19.1                          | 7.39                          | 0.506 (0.379-0.674)           | 3.38e-06 | 7.34e-06 |
| Regular Insulins                                    | C3      | C1      | 19.1                          | 9.69                          | 1.752 (1.356-2.263)           | 1.73e-05 | 3.71e-05 |
| Regular Insulins                                    | C2      | C3      | 11.45                         | 19.1                          | 1.565 (1.208-2.026)           | 6.74e-04 | 1.21e-03 |
| Sulfonylureas                                       | C2      | C3      | 58.69                         | 44.39                         | 0.609 (0.506-0.732)           | 1.39e-07 | 3.19e-07 |
| Sulfonylureas                                       | C1      | C4      | 58.84                         | 50.69                         | 0.718 (0.618-0.833)           | 1.23e-05 | 2.65e-05 |
| Sulfonylureas                                       | C3      | C1      | 44.39                         | 58.84                         | 0.625 (0.523-0.748)           | 3.04e-07 | 6.75e-07 |
| Sulfonylureas                                       | C2      | C4      | 58.69                         | 50.69                         | 0.714 (0.61-0.837)            | 3.15e-05 | 6.72e-05 |

| Variable           | Group 1 | Group 2 | Proportion or Mean in group 1 | Proportion or Mean in group 2 | Odds Ratio or Mean Difference | P value  | q-value  |
|--------------------|---------|---------|-------------------------------|-------------------------------|-------------------------------|----------|----------|
| Thiazolidinediones | C2      | C4      | 24.01                         | 18.14                         | 0.75 (0.618-0.91)             | 3.51e-03 | 6.02e-03 |
| Thiazolidinediones | C1      | C4      | 24.64                         | 18.14                         | 0.716 (0.596-0.859)           | 3.34e-04 | 6.86e-04 |

**Table S7. Other clinical and demographic differences between clinical groups at baseline (q<0.01)**

| Variable Description                                                                    | Variable Status | Group 1 | Group 2 | Proportion or Mean in group 1 | Proportion or Mean in group 2 | Odds Ratio or Mean Difference | P value  | q-value  |
|-----------------------------------------------------------------------------------------|-----------------|---------|---------|-------------------------------|-------------------------------|-------------------------------|----------|----------|
| How many alcoholic drinks do you consume in a typical week?                             |                 | C2      | C4      | 0.822                         | 1.185                         | 0.363 (0.571-0.155)           | 6.45e-04 | 3.07e-03 |
| How many alcoholic drinks do you consume in a typical week?                             |                 | C3      | C4      | 0.8                           | 1.185                         | 0.385 (0.626-0.144)           | 1.75e-03 | 6.74e-03 |
| CVD History                                                                             | Yes             | C3      | C1      | 42.58                         | 34.27                         | 1.423 (1.192-1.698)           | 9.56e-05 | 6.46e-04 |
| CVD History                                                                             | Yes             | C2      | C4      | 37.36                         | 30.8                          | 0.746 (0.635-0.877)           | 3.86e-04 | 2.07e-03 |
| CVD History                                                                             | Yes             | C3      | C4      | 42.58                         | 30.8                          | 0.6 (0.5-0.721)               | 4.46e-08 | 7.61e-07 |
| Has the participant ever been told by a physician that s/he has depression              | No              | C3      | C4      | 71.87                         | 78.71                         | 1.447 (1.18-1.773)            | 3.64e-04 | 2.07e-03 |
| Has the participant ever been told by a physician that s/he has depression              | No              | C3      | C1      | 71.87                         | 78.02                         | 0.72 (0.591-0.878)            | 1.11e-03 | 4.92e-03 |
| Has the participant ever been told by a physician that s/he has eye disease             | No              | C3      | C1      | 62.32                         | 70.81                         | 0.682 (0.569-0.819)           | 3.83e-05 | 3.16e-04 |
| Has the participant ever been told by a physician that s/he has eye disease             | No              | C3      | C4      | 62.32                         | 72.35                         | 1.582 (1.311-1.908)           | 1.64e-06 | 1.83e-05 |
| Has the participant ever been told by a physician that s/he has eye disease             | No              | C2      | C3      | 68.93                         | 62.32                         | 0.745 (0.618-0.9)             | 2.18e-03 | 8.21e-03 |
| Has the participant ever had eye surgery, including laser photocoagulation?             | No              | C3      | C1      | 70.25                         | 80.31                         | 0.579 (0.474-0.706)           | 7.21e-08 | 1.12e-06 |
| Has the participant ever had eye surgery, including laser photocoagulation?             | No              | C3      | C4      | 70.25                         | 81.05                         | 1.812 (1.476-2.225)           | 1.35e-08 | 2.59e-07 |
| Has the participant ever had eye surgery, including laser photocoagulation?             | No              | C2      | C3      | 76.64                         | 70.25                         | 0.719 (0.588-0.881)           | 1.39e-03 | 5.72e-03 |
| Feeling score of (0-100)                                                                |                 | C3      | C4      | 73.874                        | 76.763                        | 2.889 (4.326-1.452)           | 8.38e-05 | 5.78e-04 |
| Feeling score of (0-100)                                                                |                 | C3      | C1      | 73.874                        | 76.401                        | 2.527 (1.106-3.947)           | 4.99e-04 | 2.46e-03 |
| Gender                                                                                  | Female          | C3      | C4      | 45.68                         | 36.14                         | 0.673 (0.562-0.805)           | 1.50e-05 | 1.35e-04 |
| Gender                                                                                  | Female          | C3      | C1      | 45.68                         | 36.22                         | 1.481 (1.243-1.765)           | 1.15e-05 | 1.10e-04 |
| 11 gm Filament (number of applications detected)                                        | Reduced (1-7)   | C2      | C3      | 14.65                         | 20.37                         | 1.569 (1.237-1.988)           | 1.94e-04 | 1.23e-03 |
| 11 gm Filament (number of applications detected)                                        | Reduced (1-7)   | C3      | C4      | 20.37                         | 14.47                         | 0.624 (0.494-0.789)           | 7.50e-05 | 5.28e-04 |
| 12 gm Filament (number of applications detected)                                        | Absent          | C3      | C1      | 7.05                          | 2.42                          | 3.25 (2.122-5.029)            | 7.84e-08 | 1.12e-06 |
| 12 gm Filament (number of applications detected)                                        | Absent          | C2      | C3      | 3.42                          | 7.05                          | 2.324 (1.539-3.529)           | 6.45e-05 | 4.75e-04 |
| 12 gm Filament (number of applications detected)                                        | Absent          | C3      | C4      | 7.05                          | 2.87                          | 0.357 (0.232-0.544)           | 1.94e-06 | 2.09e-05 |
| Has the participant ever been told by a physician that s/he has heartfailure/CHR        | No              | C3      | C4      | 93.81                         | 97.15                         | 2.248 (1.462-3.479)           | 2.38e-04 | 1.46e-03 |
| Have you experienced shortness of breath while lying, sitting or with minimal exertion? | No              | C3      | C4      | 66.81                         | 74.02                         | 1.416 (1.154-1.735)           | 8.27e-04 | 3.83e-03 |
| Have you experienced shortness of breath while lying, sitting or with minimal exertion? | No              | C3      | C1      | 66.81                         | 73.2                          | 0.737 (0.605-0.899)           | 2.48e-03 | 9.15e-03 |
| Participant height (cm)                                                                 |                 | C3      | C1      | 169.085                       | 170.579                       | 1.493 (0.623-2.364)           | 7.81e-04 | 3.67e-03 |
| Participant height (cm)                                                                 |                 | C3      | C4      | 169.085                       | 170.653                       | 1.568 (2.451-0.685)           | 5.08e-04 | 2.46e-03 |

| Variable Description                                                                      | Variable Status | Group 1 | Group 2 | Proportion or Mean in group 1 | Proportion or Mean in group 2 | Odds Ratio or Mean Difference | P value  | q-value  |
|-------------------------------------------------------------------------------------------|-----------------|---------|---------|-------------------------------|-------------------------------|-------------------------------|----------|----------|
| Does the participant live with one or more other adults?                                  | No              | C3      | C4      | 25.16                         | 18.67                         | 0.683 (0.553-0.844)           | 4.11e-04 | 2.15e-03 |
| Does the participant live with one or more other adults?                                  | No              | C3      | C1      | 25.16                         | 19.31                         | 1.405 (1.143-1.725)           | 1.21e-03 | 5.24e-03 |
| Grade Pre-tibial edema based on today's visit. (Left Foot)                                | 1               | C3      | C1      | 15.23                         | 11.31                         | 1.817 (1.279-2.595)           | 9.25e-04 | 4.16e-03 |
| Grade Pre-tibial edema based on today's visit. (Left Foot)                                | 1               | C3      | C4      | 15.23                         | 12.36                         | 0.548 (0.383-0.78)            | 9.02e-04 | 4.12e-03 |
| Grade Pre-tibial edema based on today's visit. (Left Foot)                                | 2+ or higher    | C3      | C4      | 6.84                          | 3.95                          | 0.39 (0.245-0.619)            | 6.70e-05 | 4.82e-04 |
| Grade Pre-tibial edema based on today's visit. (Left Foot)                                | None            | C2      | C4      | 73.46                         | 69.35                         | 0.681 (0.536-0.864)           | 1.65e-03 | 6.51e-03 |
| MNSI score                                                                                |                 | C3      | C1      | 2.34                          | 2.029                         | 0.31 (0.462-0.159)            | 5.82e-05 | 4.49e-04 |
| MNSI score                                                                                |                 | C2      | C3      | 2.057                         | 2.34                          | 0.282 (0.44-0.125)            | 4.44e-04 | 2.26e-03 |
| Has the participant ever been told by a physician that s/he has neuropathy/nerve problems | No              | C3      | C1      | 68.13                         | 75.03                         | 0.711 (0.588-0.861)           | 4.47e-04 | 2.26e-03 |
| Has the participant ever been told by a physician that s/he has neuropathy/nerve problems | No              | C3      | C4      | 68.13                         | 77.91                         | 1.65 (1.353-2.01)             | 7.11e-07 | 8.53e-06 |
| Has the participant ever been told by a physician that s/he has protein in his/her urine  | No              | C3      | C4      | 75.74                         | 83.1                          | 1.575 (1.267-1.956)           | 4.00e-05 | 3.16e-04 |
| Has the participant ever been told by a physician that s/he has protein in his/her urine  | No              | C3      | C1      | 75.74                         | 81.14                         | 0.726 (0.59-0.894)            | 2.51e-03 | 9.15e-03 |
| Race                                                                                      | White           | C1      | C4      | 63.65                         | 73.01                         | 1.544 (1.319-1.81)            | 7.41e-08 | 1.12e-06 |
| Race                                                                                      | White           | C2      | C3      | 59.32                         | 47.1                          | 0.61 (0.51-0.731)             | 7.97e-08 | 1.12e-06 |
| Race                                                                                      | White           | C3      | C4      | 47.1                          | 73.01                         | 3.038 (2.527-3.657)           | 4.67e-32 | 5.04e-30 |
| Race                                                                                      | White           | C2      | C4      | 59.32                         | 73.01                         | 1.855 (1.575-2.186)           | 1.46e-13 | 4.30e-12 |
| Race                                                                                      | White           | C3      | C1      | 47.1                          | 63.65                         | 0.508 (0.426-0.605)           | 3.73e-14 | 1.34e-12 |
| Has the participant experienced retinopathy (a type of vision problem)?                   | No              | C3      | C1      | 80.46                         | 89.68                         | 0.474 (0.366-0.613)           | 1.36e-08 | 2.59e-07 |
| Has the participant experienced retinopathy (a type of vision problem)?                   | No              | C2      | C3      | 87.98                         | 80.46                         | 0.563 (0.434-0.729)           | 1.39e-05 | 1.29e-04 |
| Has the participant experienced retinopathy (a type of vision problem)?                   | No              | C2      | C4      | 87.98                         | 93.07                         | 1.834 (1.378-2.455)           | 3.70e-05 | 3.16e-04 |
| Has the participant experienced retinopathy (a type of vision problem)?                   | No              | C3      | C4      | 80.46                         | 93.07                         | 3.259 (2.437-4.385)           | 2.95e-15 | 1.19e-13 |
| Grade Pre-tibial edema based on today's visit. (Right Foot)                               | 1               | C3      | C4      | 15.74                         | 12.29                         | 0.525 (0.367-0.748)           | 3.79e-04 | 2.07e-03 |
| Grade Pre-tibial edema based on today's visit. (Right Foot)                               | 1               | C3      | C1      | 15.74                         | 11.96                         | 1.783 (1.257-2.541)           | 1.26e-03 | 5.38e-03 |
| Grade Pre-tibial edema based on today's visit. (Right Foot)                               | 2+ or higher    | C3      | C4      | 5.68                          | 3.8                           | 0.451 (0.278-0.731)           | 1.21e-03 | 5.24e-03 |
| Grade Pre-tibial edema based on today's visit. (Right Foot)                               | None            | C2      | C4      | 73.3                          | 69.71                         | 0.688 (0.541-0.874)           | 2.26e-03 | 8.40e-03 |
| Visual Acuity Score (0-100) Left Side                                                     |                 | C2      | C3      | 73.493                        | 70.921                        | 2.572 (1.162-3.981)           | 3.56e-04 | 2.07e-03 |
| Visual Acuity Score (0-100) Left Side                                                     |                 | C3      | C1      | 70.921                        | 73.433                        | 2.512 (1.133-3.891)           | 3.65e-04 | 2.07e-03 |
| Visual Acuity Score (0-100) Left Side                                                     |                 | C3      | C4      | 70.921                        | 74.255                        | 3.335 (4.73-1.94)             | 3.00e-06 | 3.13e-05 |
| Visual Acuity Score (0-100) Right Side                                                    |                 | C3      | C1      | 70.805                        | 73.493                        | 2.688 (1.324-4.052)           | 1.16e-04 | 7.66e-04 |
| Visual Acuity Score (0-100) Right Side                                                    |                 | C2      | C3      | 73.315                        | 70.805                        | 2.51 (1.097-3.922)            | 5.05e-04 | 2.46e-03 |

| Variable Description                                                                               | Variable Status | Group 1 | Group 2 | Proportion or Mean in group 1 | Proportion or Mean in group 2 | Odds Ratio or Mean Difference | P value  | q-value  |
|----------------------------------------------------------------------------------------------------|-----------------|---------|---------|-------------------------------|-------------------------------|-------------------------------|----------|----------|
| Visual Acuity Score (0-100) Right Side                                                             |                 | C3      | C4      | 70.805                        | 74.412                        | 3.606 (4.996-2.216)           | 4.06e-07 | 5.26e-06 |
| Participant eligible for BP and Lipid Trials                                                       | Yes             | C3      | C4      | 22.32                         | 30.94                         | 1.559 (1.273-1.916)           | 2.03e-05 | 1.78e-04 |
| Participant eligible for BP and Lipid Trials                                                       | Yes             | C3      | C1      | 22.32                         | 28.48                         | 0.722 (0.589-0.882)           | 1.56e-03 | 6.33e-03 |
| Has the participant ever been told by a physician that s/he has a foot ulcer requiring antibiotics | No              | C3      | C1      | 92.26                         | 95.97                         | 0.501 (0.347-0.723)           | 2.11e-04 | 1.31e-03 |
| Has the participant ever been told by a physician that s/he has a foot ulcer requiring antibiotics | No              | C3      | C4      | 92.26                         | 96.42                         | 2.257 (1.533-3.339)           | 3.95e-05 | 3.16e-04 |
| Has the participant experienced vision loss (a type of vision problem)?                            | No              | C3      | C1      | 80.99                         | 86.46                         | 0.667 (0.522-0.855)           | 1.31e-03 | 5.48e-03 |
| Has the participant experienced vision loss (a type of vision problem)?                            | No              | C3      | C4      | 80.99                         | 87.55                         | 1.651 (1.275-2.137)           | 1.37e-04 | 8.87e-04 |
| Waist circumference (cm)                                                                           |                 | C1      | C4      | 106.909                       | 108.489                       | 1.58 (2.567-0.592)            | 1.72e-03 | 6.71e-03 |
| Waist circumference (cm)                                                                           |                 | C3      | C4      | 105.402                       | 108.489                       | 3.087 (4.312-1.863)           | 8.45e-07 | 9.78e-06 |
| Waist circumference (cm)                                                                           |                 | C2      | C4      | 105.54                        | 108.489                       | 2.949 (3.974-1.924)           | 1.88e-08 | 3.38e-07 |
| Participant weight (kg)                                                                            |                 | C2      | C4      | 91.903                        | 95.57                         | 3.666 (5.041-2.292)           | 1.82e-07 | 2.46e-06 |
| Participant weight (kg)                                                                            |                 | C2      | C1      | 91.903                        | 94.133                        | 2.23 (0.87-3.59)              | 1.32e-03 | 5.48e-03 |
| Participant weight (kg)                                                                            |                 | C3      | C4      | 91.805                        | 95.57                         | 3.765 (5.401-2.129)           | 6.86e-06 | 6.73e-05 |
| Years since Diabetes Diagnosis                                                                     |                 | C2      | C1      | 11.447                        | 10.443                        | 1.003 (1.557-0.449)           | 3.90e-04 | 2.07e-03 |
| Years since Diabetes Diagnosis                                                                     |                 | C1      | C4      | 10.443                        | 8.582                         | 1.862 (1.343-2.381)           | 2.46e-12 | 6.12e-11 |
| Years since Diabetes Diagnosis                                                                     |                 | C2      | C3      | 11.447                        | 13.772                        | 2.325 (3.032-1.618)           | 1.49e-10 | 3.22e-09 |
| Years since Diabetes Diagnosis                                                                     |                 | C2      | C4      | 11.447                        | 8.582                         | 2.865 (2.316-3.414)           | 3.99e-24 | 2.59e-22 |
| Years since Diabetes Diagnosis                                                                     |                 | C3      | C4      | 13.772                        | 8.582                         | 5.19 (4.51-5.87)              | 4.29e-47 | 6.94e-45 |
| Years since Diabetes Diagnosis                                                                     |                 | C3      | C1      | 13.772                        | 10.443                        | 3.328 (4.012-2.644)           | 5.69e-21 | 2.63e-19 |

**Table S8. Other clinical and demographic differences between clinical groups at baseline after adjusting for years with type 2 diabetes (q<0.01).**

| Variable Description                                                       | Variable Status                  | Group 1 | Group 2 | Proportion or Mean in group 1 | Proportion or Mean in group 2 | Odds Ratio or Mean Difference | P value  | q-value  |
|----------------------------------------------------------------------------|----------------------------------|---------|---------|-------------------------------|-------------------------------|-------------------------------|----------|----------|
| How many alcoholic drinks do you consume in a typical week?                |                                  | C2      | C4      | 0.822                         | 1.185                         | 0.363 (0.571-0.155)           | 6.45e-04 | 3.59e-03 |
| How many alcoholic drinks do you consume in a typical week?                |                                  | C3      | C4      | 0.8                           | 1.185                         | 0.385 (0.626-0.144)           | 1.75e-03 | 7.74e-03 |
| CVD History                                                                | Yes                              | C3      | C1      | 42.58                         | 34.27                         | 1.423 (1.192-1.698)           | 9.56e-05 | 7.46e-04 |
| CVD History                                                                | Yes                              | C2      | C4      | 37.36                         | 30.8                          | 0.746 (0.635-0.877)           | 3.86e-04 | 2.45e-03 |
| CVD History                                                                | Yes                              | C3      | C4      | 42.58                         | 30.8                          | 0.6 (0.5-0.721)               | 4.46e-08 | 9.16e-07 |
| Has the participant ever been told by a physician that s/he has depression | No                               | C3      | C1      | 71.87                         | 78.02                         | 0.72 (0.591-0.878)            | 1.11e-03 | 5.69e-03 |
| Has the participant ever been told by a physician that s/he has depression | No                               | C3      | C4      | 71.87                         | 78.71                         | 1.447 (1.18-1.773)            | 3.64e-04 | 2.45e-03 |
| What is the participant's highest level of education?                      | High school grad (or GED)        | C3      | C4      | 26.49                         | 26.99                         | 1.571 (1.191-2.073)           | 1.40e-03 | 6.56e-03 |
| What is the participant's highest level of education?                      | Some college or technical school | C3      | C1      | 31.01                         | 35.26                         | 0.66 (0.511-0.853)            | 1.46e-03 | 6.80e-03 |
| What is the participant's highest level of education?                      | Some college or technical school | C3      | C4      | 31.01                         | 31.89                         | 1.586 (1.211-2.076)           | 7.89e-04 | 4.28e-03 |

| Variable Description                                                                    | Variable Status          | Group 1 | Group 2 | Proportion or Mean in group 1 | Proportion or Mean in group 2 | Odds Ratio or Mean Difference | P value  | q-value  |
|-----------------------------------------------------------------------------------------|--------------------------|---------|---------|-------------------------------|-------------------------------|-------------------------------|----------|----------|
| What is the participant's highest level of education?                                   | College graduate or more | C3      | C4      | 23                            | 28.46                         | 1.907 (1.44-2.529)            | 6.79e-06 | 8.11e-05 |
| What is the participant's highest level of education?                                   | College graduate or more | C2      | C4      | 24.66                         | 28.46                         | 1.549 (1.208-1.99)            | 5.82e-04 | 3.29e-03 |
| Has the participant ever been told by a physician that s/he has eye disease             | No                       | C2      | C3      | 68.93                         | 62.32                         | 0.745 (0.618-0.9)             | 2.18e-03 | 9.45e-03 |
| Has the participant ever been told by a physician that s/he has eye disease             | No                       | C3      | C4      | 62.32                         | 72.35                         | 1.582 (1.311-1.908)           | 1.64e-06 | 2.21e-05 |
| Has the participant ever been told by a physician that s/he has eye disease             | No                       | C3      | C1      | 62.32                         | 70.81                         | 0.682 (0.569-0.819)           | 3.83e-05 | 3.55e-04 |
| Has the participant ever had eye surgery, including laser photocoagulation?             | No                       | C3      | C1      | 70.25                         | 80.31                         | 0.579 (0.474-0.706)           | 7.21e-08 | 1.35e-06 |
| Has the participant ever had eye surgery, including laser photocoagulation?             | No                       | C2      | C3      | 76.64                         | 70.25                         | 0.719 (0.588-0.881)           | 1.39e-03 | 6.56e-03 |
| Has the participant ever had eye surgery, including laser photocoagulation?             | No                       | C3      | C4      | 70.25                         | 81.05                         | 1.812 (1.476-2.225)           | 1.35e-08 | 3.11e-07 |
| Feeling score of (0-100)                                                                |                          | C3      | C1      | 73.874                        | 76.401                        | 2.527 (1.106-3.947)           | 4.99e-04 | 2.91e-03 |
| Feeling score of (0-100)                                                                |                          | C3      | C4      | 73.874                        | 76.763                        | 2.889 (4.326-1.452)           | 8.38e-05 | 6.67e-04 |
| Gender                                                                                  | Female                   | C3      | C4      | 45.68                         | 36.14                         | 0.673 (0.562-0.805)           | 1.50e-05 | 1.54e-04 |
| Gender                                                                                  | Female                   | C3      | C1      | 45.68                         | 36.22                         | 1.481 (1.243-1.765)           | 1.15e-05 | 1.25e-04 |
| 11 gm Filament (number of applications detected)                                        | Reduced (1-7)            | C3      | C4      | 20.37                         | 14.47                         | 0.624 (0.494-0.789)           | 7.50e-05 | 6.10e-04 |
| 11 gm Filament (number of applications detected)                                        | Reduced (1-7)            | C2      | C3      | 14.65                         | 20.37                         | 1.569 (1.237-1.988)           | 1.94e-04 | 1.43e-03 |
| 12 gm Filament (number of applications detected)                                        | Absent                   | C3      | C4      | 7.05                          | 2.87                          | 0.357 (0.232-0.544)           | 1.94e-06 | 2.52e-05 |
| 12 gm Filament (number of applications detected)                                        | Absent                   | C2      | C3      | 3.42                          | 7.05                          | 2.324 (1.539-3.529)           | 6.45e-05 | 5.46e-04 |
| 12 gm Filament (number of applications detected)                                        | Absent                   | C3      | C1      | 7.05                          | 2.42                          | 3.25 (2.122-5.029)            | 7.84e-08 | 1.35e-06 |
| Has the participant ever been told by a physician that s/he has heartfailure/CHR        | No                       | C3      | C4      | 93.81                         | 97.15                         | 2.248 (1.462-3.479)           | 2.38e-04 | 1.69e-03 |
| Have you experienced shortness of breath while lying, sitting or with minimal exertion? | No                       | C3      | C4      | 66.81                         | 74.02                         | 1.416 (1.154-1.735)           | 8.27e-04 | 4.42e-03 |
| Participant height (cm)                                                                 |                          | C3      | C1      | 169.085                       | 170.579                       | 1.493 (0.623-2.364)           | 7.81e-04 | 4.28e-03 |
| Participant height (cm)                                                                 |                          | C3      | C4      | 169.085                       | 170.653                       | 1.568 (2.451-0.685)           | 5.08e-04 | 2.91e-03 |
| Does the participant live with one or more other adults?                                | No                       | C3      | C4      | 25.16                         | 18.67                         | 0.683 (0.553-0.844)           | 4.11e-04 | 2.54e-03 |
| Does the participant live with one or more other adults?                                | No                       | C3      | C1      | 25.16                         | 19.31                         | 1.405 (1.143-1.725)           | 1.21e-03 | 6.06e-03 |
| Grade Pre-tibial edema based on today's visit. (Left Foot)                              | 1                        | C3      | C4      | 15.23                         | 12.36                         | 0.548 (0.383-0.78)            | 9.02e-04 | 4.75e-03 |
| Grade Pre-tibial edema based on today's visit. (Left Foot)                              | 1                        | C3      | C1      | 15.23                         | 11.31                         | 1.817 (1.279-2.595)           | 9.25e-04 | 4.81e-03 |
| Grade Pre-tibial edema based on today's visit. (Left Foot)                              | 2+ or higher             | C3      | C4      | 6.84                          | 3.95                          | 0.39 (0.245-0.619)            | 6.70e-05 | 5.56e-04 |
| Grade Pre-tibial edema based on today's visit. (Left Foot)                              | None                     | C2      | C4      | 73.46                         | 69.35                         | 0.681 (0.536-0.864)           | 1.65e-03 | 7.47e-03 |
| MNSI score                                                                              |                          | C2      | C3      | 2.057                         | 2.34                          | 0.282 (0.44-0.125)            | 4.44e-04 | 2.68e-03 |
| MNSI score                                                                              |                          | C3      | C1      | 2.34                          | 2.029                         | 0.31 (0.462-0.159)            | 5.82e-05 | 5.05e-04 |



| Variable Description                                                                      | Variable Status | Group 1 | Group 2 | Proportion or Mean in group 1 | Proportion or Mean in group 2 | Odds Ratio or Mean Difference | P value  | q-value  |
|-------------------------------------------------------------------------------------------|-----------------|---------|---------|-------------------------------|-------------------------------|-------------------------------|----------|----------|
| Network                                                                                   | 5               | C2      | C4      | 14.06                         | 8.71                          | 0.519 (0.383-0.701)           | 2.03e-05 | 1.98e-04 |
| Network                                                                                   | 5               | C3      | C4      | 17.29                         | 8.71                          | 0.333 (0.235-0.471)           | 5.47e-10 | 1.42e-08 |
| Network                                                                                   | 5               | C3      | C1      | 17.29                         | 10.14                         | 2.152 (1.539-3.022)           | 8.36e-06 | 9.34e-05 |
| Network                                                                                   | 6               | C3      | C4      | 18.58                         | 12.36                         | 0.441 (0.316-0.612)           | 1.12e-06 | 1.56e-05 |
| Network                                                                                   | 7               | C3      | C4      | 15.87                         | 11.05                         | 0.461 (0.327-0.647)           | 8.38e-06 | 9.34e-05 |
| Network                                                                                   | 7               | C1      | C4      | 14.3                          | 11.05                         | 0.646 (0.489-0.851)           | 1.92e-03 | 8.43e-03 |
| Network                                                                                   | 7               | C2      | C4      | 14.53                         | 11.05                         | 0.637 (0.477-0.85)            | 2.22e-03 | 9.51e-03 |
| Has the participant ever been told by a physician that s/he has neuropathy/nerve problems | No              | C3      | C1      | 68.13                         | 75.03                         | 0.711 (0.588-0.861)           | 4.47e-04 | 2.68e-03 |
| Has the participant ever been told by a physician that s/he has neuropathy/nerve problems | No              | C3      | C4      | 68.13                         | 77.91                         | 1.65 (1.353-2.01)             | 7.11e-07 | 1.07e-05 |
| Has the participant ever been told by a physician that s/he has protein in his/her urine  | No              | C3      | C4      | 75.74                         | 83.1                          | 1.575 (1.267-1.956)           | 4.00e-05 | 3.55e-04 |
| Race                                                                                      | White           | C3      | C4      | 47.1                          | 73.01                         | 3.038 (2.527-3.657)           | 4.67e-32 | 6.06e-30 |
| Race                                                                                      | White           | C3      | C1      | 47.1                          | 63.65                         | 0.508 (0.426-0.605)           | 3.73e-14 | 1.61e-12 |
| Race                                                                                      | White           | C1      | C4      | 63.65                         | 73.01                         | 1.544 (1.319-1.81)            | 7.41e-08 | 1.35e-06 |
| Race                                                                                      | White           | C2      | C4      | 59.32                         | 73.01                         | 1.855 (1.575-2.186)           | 1.46e-13 | 5.69e-12 |
| Race                                                                                      | White           | C2      | C3      | 59.32                         | 47.1                          | 0.61 (0.51-0.731)             | 7.97e-08 | 1.35e-06 |
| Has the participant experienced retinopathy (a type of vision problem)?                   | No              | C2      | C3      | 87.98                         | 80.46                         | 0.563 (0.434-0.729)           | 1.39e-05 | 1.46e-04 |
| Has the participant experienced retinopathy (a type of vision problem)?                   | No              | C2      | C4      | 87.98                         | 93.07                         | 1.834 (1.378-2.455)           | 3.70e-05 | 3.52e-04 |
| Has the participant experienced retinopathy (a type of vision problem)?                   | No              | C3      | C1      | 80.46                         | 89.68                         | 0.474 (0.366-0.613)           | 1.36e-08 | 3.11e-07 |
| Has the participant experienced retinopathy (a type of vision problem)?                   | No              | C3      | C4      | 80.46                         | 93.07                         | 3.259 (2.437-4.385)           | 2.95e-15 | 1.44e-13 |
| Grade Pre-tibial edema based on today's visit. (Right Foot)                               | 1               | C3      | C1      | 15.74                         | 11.96                         | 1.783 (1.257-2.541)           | 1.26e-03 | 6.23e-03 |
| Grade Pre-tibial edema based on today's visit. (Right Foot)                               | 1               | C3      | C4      | 15.74                         | 12.29                         | 0.525 (0.367-0.748)           | 3.79e-04 | 2.45e-03 |
| Grade Pre-tibial edema based on today's visit. (Right Foot)                               | 2+ or higher    | C3      | C4      | 5.68                          | 3.8                           | 0.451 (0.278-0.731)           | 1.21e-03 | 6.06e-03 |
| Grade Pre-tibial edema based on today's visit. (Right Foot)                               | None            | C2      | C4      | 73.3                          | 69.71                         | 0.688 (0.541-0.874)           | 2.26e-03 | 9.56e-03 |
| Visual Acuity Score (0-100) Left Side                                                     |                 | C3      | C4      | 70.921                        | 74.255                        | 3.335 (4.73-1.94)             | 3.00e-06 | 3.77e-05 |
| Visual Acuity Score (0-100) Left Side                                                     |                 | C3      | C1      | 70.921                        | 73.433                        | 2.512 (1.133-3.891)           | 3.65e-04 | 2.45e-03 |
| Visual Acuity Score (0-100) Left Side                                                     |                 | C2      | C3      | 73.493                        | 70.921                        | 2.572 (1.162-3.981)           | 3.56e-04 | 2.45e-03 |
| Visual Acuity Score (0-100) Right Side                                                    |                 | C3      | C4      | 70.805                        | 74.412                        | 3.606 (4.996-2.216)           | 4.06e-07 | 6.33e-06 |
| Visual Acuity Score (0-100) Right Side                                                    |                 | C3      | C1      | 70.805                        | 73.493                        | 2.688 (1.324-4.052)           | 1.16e-04 | 8.86e-04 |
| Visual Acuity Score (0-100) Right Side                                                    |                 | C2      | C3      | 73.315                        | 70.805                        | 2.51 (1.097-3.922)            | 5.05e-04 | 2.91e-03 |
| Participant eligible for BP and Lipid Trials                                              | Yes             | C3      | C4      | 22.32                         | 30.94                         | 1.559 (1.273-1.916)           | 2.03e-05 | 1.98e-04 |
| Participant eligible for BP and Lipid Trials                                              | Yes             | C3      | C1      | 22.32                         | 28.48                         | 0.722 (0.589-0.882)           | 1.56e-03 | 7.18e-03 |

| Variable Description                                                                               | Variable Status | Group 1 | Group 2 | Proportion or Mean in group 1 | Proportion or Mean in group 2 | Odds Ratio or Mean Difference | P value  | q-value  |
|----------------------------------------------------------------------------------------------------|-----------------|---------|---------|-------------------------------|-------------------------------|-------------------------------|----------|----------|
| Has the participant ever been told by a physician that s/he has a foot ulcer requiring antibiotics | No              | C3      | C1      | 92.26                         | 95.97                         | 0.501 (0.347-0.723)           | 2.11e-04 | 1.52e-03 |
| Has the participant ever been told by a physician that s/he has a foot ulcer requiring antibiotics | No              | C3      | C4      | 92.26                         | 96.42                         | 2.257 (1.533-3.339)           | 3.95e-05 | 3.55e-04 |
| Has the participant experienced vision loss (a type of vision problem)?                            | No              | C3      | C4      | 80.99                         | 87.55                         | 1.651 (1.275-2.137)           | 1.37e-04 | 1.03e-03 |
| Has the participant experienced vision loss (a type of vision problem)?                            | No              | C3      | C1      | 80.99                         | 86.46                         | 0.667 (0.522-0.855)           | 1.31e-03 | 6.35e-03 |
| Waist circumference (cm)                                                                           |                 | C1      | C4      | 106.909                       | 108.489                       | 1.58 (2.567-0.592)            | 1.72e-03 | 7.71e-03 |

**Table S9. On-trial differences in lipids and blood pressure between C4 and other clusters in the intensive glycemia trial arm.**

| Risk Factor <sup>1</sup>  | non-C4 mean | C4 mean | Pvalue    | FDR Pvalue |
|---------------------------|-------------|---------|-----------|------------|
| HbA1c (%)                 | 6.94        | 6.03    | <2.00E-16 | <2.00E-16  |
| SBP (mm Hg)               | 128.59      | 125.71  | 1.03E-10  | 7.21E-10   |
| LDL (mg/dL)               | 99.16       | 94.91   | 7.54E-06  | 4.52E-05   |
| Total Cholesterol (mg/dL) | 174.84      | 170.37  | 0.0005    | 0.0027     |
| DBP (mm Hg)               | 70.32       | 69.52   | 0.0106    | 0.0425     |
| HDL (mg/dL)               | 43.72       | 42.83   | 0.0174    | 0.0523     |
| Triglycerides (mg/dL)     | 160.64      | 162.71  | 0.2282    | 0.4455     |
| VLDL (mg/dL)              | 31.42       | 31.83   | 0.2228    | 0.4455     |

SBP=systolic blood pressure; DBP=diastolic blood pressure, LDL=low density lipoprotein, HDL=high density lipoprotein, VLDL= very low density lipoprotein. <sup>1</sup>Variables were measured by taking each individuals median value while on-trial.

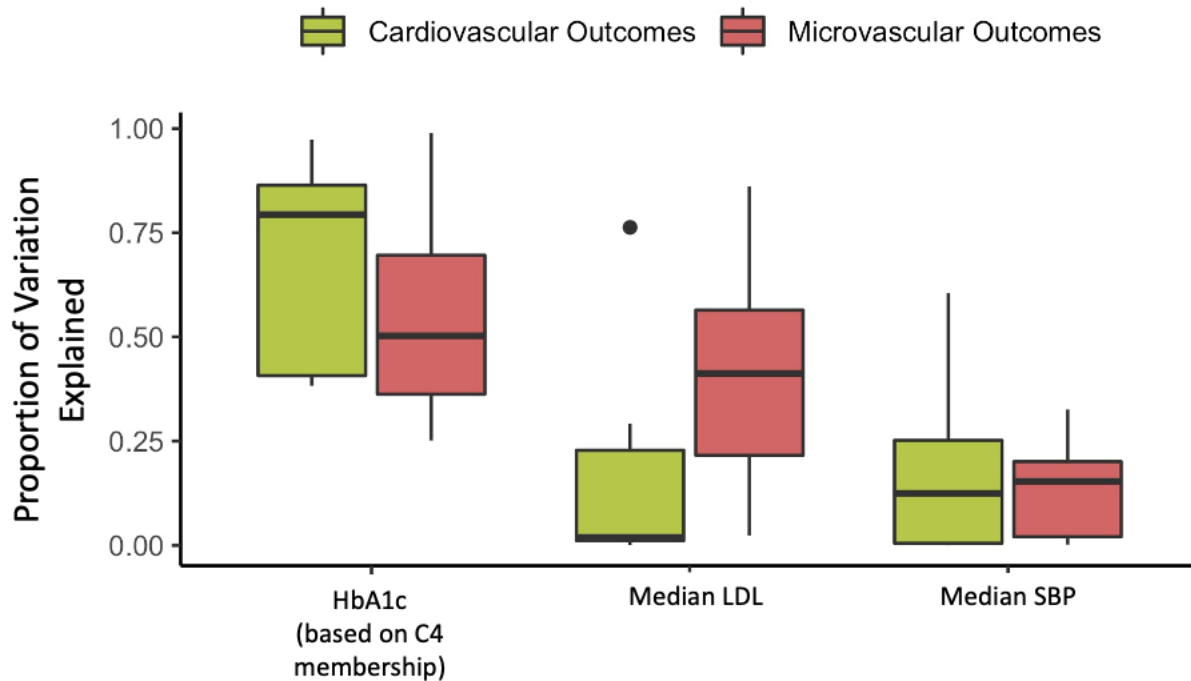

**Figure S9. Variation explained for cardiovascular and microvascular outcomes by on-trial risk factors.**

Risk of outcomes were calculated using Cox proportional hazards models based on C4 membership, median low-density lipoprotein (LDL) and median systolic blood pressure (SBP). Using Wald's Chi-square tests, the proportion of variation explained for each risk factor was obtained for all cardiovascular (CVD) and microvascular outcomes. The range of Chi-square proportions for each risk factor across outcomes are shown in each boxplot. HbA1c was estimated based on cluster membership compared to median on-trial LDL and SBP. Stratifying by HbA1c explained more variation in both CVD and microvascular outcomes than LDL or SBP. Interestingly, LDL appears to be a more informative risk factor for microvascular outcomes than for CVD outcomes.

### Genome-wide Association Tests and Variable Selection

When comparing the low-risk, intensive clinical group (C4) to the other intensive clinical groups (C1, C2, and C3), four genotyped variants reached suggestive significance ( $P < 5.0 \times 10^{-6}$ ). These variants and their base position, log odds ratio, and  $P$  values are presented in Table S10. No genotyped variants reached genome-wide significance ( $P < 5.0 \times 10^{-8}$ ). The most significant loci, rs220721, is located within *MAS1* and had a 1.38 fold increase in the low risk cluster and a MAF of 27%. The SNP, rs1793004, is located within *NELL1* and had a 0.74 fold decrease in the low risk clinical group and a MAF of 30%. The third SNP, rs6921353, is located in an intronic region 6Mbp downstream of *IGF2R* and associated with a 0.75 fold decrease within the low risk clinical group and a MAF of 34%. A visual representation of the GWAS results are presented in a Manhattan plot in Figure 3A, in the main text. A quantile-quantile (Q-Q) plot for every  $p$ -value is shown in Figure S8. The Q-Q plot shows the expected  $P$  values based on a normal distribution compared to the observed  $P$  values.

**Table S10. GWAS results for SNPs that reached suggestive significance ( $P < 5 \times 10^{-6}$ ).**

| SNP        | Type <sup>1</sup> | Chr | Pos       | Gene   | A1 | A2 | OR   | P-value  |
|------------|-------------------|-----|-----------|--------|----|----|------|----------|
| rs220721   | GENO              | 6   | 159907588 | MAS1   | T  | C  | 1.38 | 4.34E-07 |
| rs77989944 | IMPU              | 6   | 1312510   | FOXQ1  | T  | C  | 0.74 | 4.35E-07 |
| rs7772415  | IMPU              | 6   | 166300093 | -      | A  | G  | 0.73 | 4.38E-07 |
| rs3926288  | IMPU              | 6   | 166299490 | -      | A  | G  | 0.73 | 5.48E-07 |
| rs9347360  | IMPU              | 6   | 159914023 | MAS1   | C  | T  | 1.37 | 7.03E-07 |
| rs220724   | IMPU              | 6   | 159905236 | MAS1   | A  | G  | 1.37 | 8.45E-07 |
| rs10214855 | IMPU              | 6   | 159911681 | MAS1   | A  | G  | 1.36 | 1.03E-06 |
| rs2024585  | IMPU              | 6   | 159913985 | MAS1   | A  | G  | 1.37 | 1.08E-06 |
| rs2719207  | IMPU              | 8   | 129395437 | CCDC26 | G  | C  | 1.43 | 1.14E-06 |

|                        |      |    |           |                    |    |    |      |          |
|------------------------|------|----|-----------|--------------------|----|----|------|----------|
| rs2579861              | IMPU | 8  | 129389629 | CCDC26             | C  | T  | 1.43 | 1.28E-06 |
| rs2568406              | IMPU | 8  | 129390326 | CCDC26             | A  | G  | 1.43 | 1.34E-06 |
| rs6921526              | IMPU | 6  | 166297374 | -                  | G  | A  | 0.75 | 1.58E-06 |
| rs1793004              | GENO | 11 | 20677383  | NELL1              | C  | G  | 0.74 | 1.82E-06 |
| rs220734               | IMPU | 6  | 159893659 | MAS1               | G  | A  | 1.37 | 1.97E-06 |
| rs220734               | IMPU | 6  | 159893659 | AL035691.1         | G  | A  | 1.37 | 1.97E-06 |
| rs1617707              | IMPU | 11 | 20678515  | NELL1              | G  | A  | 0.74 | 2.26E-06 |
| rs6921353 <sup>2</sup> | GENO | 6  | 166297303 | PRR18 <sup>2</sup> | G  | A  | 0.75 | 2.44E-06 |
| rs1328399              | IMPU | 6  | 152837599 | LINC02840          | T  | C  | 1.42 | 2.47E-06 |
| rs6456073              | IMPU | 6  | 166296031 | -                  | T  | G  | 0.74 | 3.04E-06 |
| rs4505826              | META | 4  | 95485799  | UNC5C              | A  | G  | 1.36 | 3.29E-06 |
| rs17307880             | IMPU | 6  | 152848750 | LINC02840          | T  | G  | 1.41 | 3.39E-06 |
| rs6936214              | IMPU | 6  | 159958355 | -                  | G  | A  | 1.33 | 3.50E-06 |
| rs10710587             | IMPU | 4  | 102189067 | -                  | GT | G  | 0.75 | 3.52E-06 |
| rs4709387              | IMPU | 6  | 159961484 | -                  | C  | T  | 1.35 | 3.55E-06 |
| rs6918897              | IMPU | 6  | 159919903 | -                  | G  | A  | 1.34 | 3.63E-06 |
| rs6455671              | IMPU | 6  | 159924005 | -                  | G  | T  | 1.33 | 3.71E-06 |
| rs10050886             | META | 5  | 172148456 | STK10              | A  | G  | 1.57 | 3.73E-06 |
| rs1270874              | GENO | 10 | 29550935  | SVIL               | A  | C  | 1.33 | 3.73E-06 |
| rs202225334            | IMPU | 6  | 159924025 | -                  | G  | GA | 1.33 | 3.73E-06 |
| rs75730240             | IMPU | 6  | 159924028 | -                  | A  | AC | 1.33 | 3.73E-06 |
| rs9457791              | IMPU | 6  | 159966886 | -                  | C  | T  | 1.33 | 4.21E-06 |
| rs10845619             | META | 12 | 12729394  | APOLD1             | A  | G  | 1.43 | 4.36E-06 |
| rs12922741             | IMPU | 16 | 27168591  | LINC02129          | G  | A  | 0.76 | 4.36E-06 |
| rs172698               | IMPU | 6  | 159901528 | MAS1               | G  | A  | 1.35 | 4.36E-06 |
| rs172698               | IMPU | 6  | 159901528 | AL035691.1         | G  | A  | 1.35 | 4.36E-06 |
| rs170220               | IMPU | 6  | 159901671 | MAS1               | G  | A  | 1.35 | 4.37E-06 |
| rs170220               | IMPU | 6  | 159901671 | AL035691.1         | G  | A  | 1.35 | 4.37E-06 |
| rs9456483              | IMPU | 6  | 159959968 | -                  | G  | A  | 1.33 | 4.60E-06 |
| rs1001357              | IMPU | 6  | 159952077 | -                  | C  | A  | 1.33 | 4.66E-06 |
| rs66801308             | IMPU | 6  | 159926605 | -                  | T  | G  | 1.33 | 4.66E-06 |
| rs1793005              | IMPU | 11 | 20677212  | NELL1              | C  | G  | 0.75 | 4.75E-06 |
| rs6939598              | IMPU | 6  | 159950510 | -                  | T  | G  | 1.33 | 4.81E-06 |
| rs62571397             | IMPU | 9  | 134798135 | COL5A1             | T  | C  | 1.48 | 4.84E-06 |
| rs62571397             | IMPU | 9  | 134798135 | -                  | T  | C  | 1.48 | 4.84E-06 |
| rs220726               | IMPU | 6  | 159903111 | MAS1               | A  | T  | 1.35 | 4.91E-06 |

<sup>1</sup> GENO=genotyped across all subjects; IMPU=imputed across all subjects; META=genotyped in some subjects and imputed in others. They were analyzed separately and meta-analyzed together.

<sup>2</sup>rs6921353 is located in an intronic region 8Kb upstream of *PRR18*

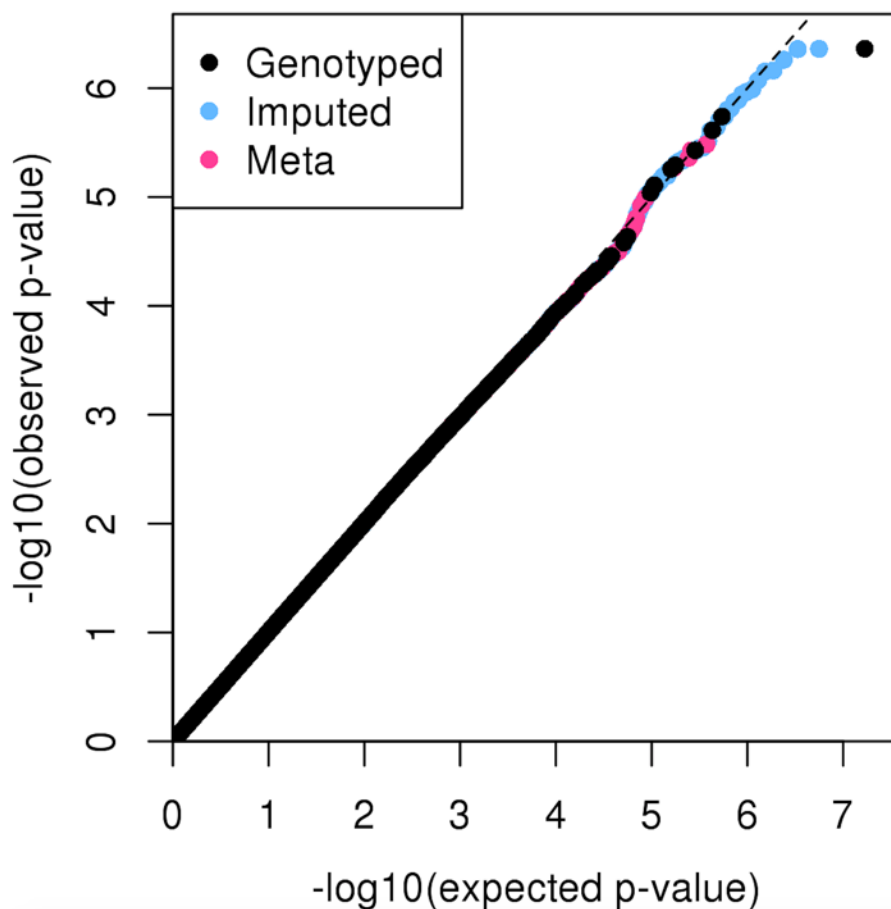

**Figure S10. Q-Q plot for observed  $P$  values**

#### Pathway Analysis

The SNP-based network analysis resulted in two significant genes: *SFT2D1* (FDR  $P = .008$ ) and *PRR18* (FDR  $P = .008$ ). Interestingly, 155 ontology terms were significantly enriched ( $q < 0.05$ ) based on the SNPs selected into the PS (Table S10).

**Table S11. Ontology terms associated with SNPs in PS based on enrichment analysis (FDR  $P < .05$ ).**

| Ontology Term                                    | Z-score | $P$ value | FDR $P$ value | Num. of SNPs |
|--------------------------------------------------|---------|-----------|---------------|--------------|
| body mass index                                  | 11      | 1.40E-27  | 1.60E-24      | 722          |
| body height                                      | 10.9    | 1.00E-26  | 5.40E-24      | 409          |
| inflammatory bowel disease                       | 10.5    | 8.10E-25  | 3.00E-22      | 454          |
| lipid measurement                                | 9.81    | 2.60E-22  | 7.10E-20      | 857          |
| rheumatic disease                                | 9.59    | 2.20E-21  | 4.90E-19      | 667          |
| lipoprotein measurement                          | 8.97    | 5.50E-19  | 1.00E-16      | 674          |
| ulcerative colitis                               | 8.95    | 1.20E-18  | 1.80E-16      | 266          |
| forced expiratory volume                         | 8.8     | 2.40E-18  | 3.20E-16      | 647          |
| Crohn's disease                                  | 8.84    | 2.60E-18  | 3.20E-16      | 317          |
| physical activity measurement                    | 8.47    | 7.20E-17  | 7.90E-15      | 190          |
| high density lipoprotein cholesterol measurement | 8.15    | 7.20E-16  | 7.10E-14      | 320          |
| obesity                                          | 7.85    | 9.50E-15  | 8.70E-13      | 99           |
| multiple sclerosis                               | 7.53    | 9.00E-14  | 7.50E-12      | 187          |
| triglyceride measurement                         | 7.47    | 1.20E-13  | 9.10E-12      | 302          |
| rheumatoid arthritis                             | 7.37    | 2.60E-13  | 1.90E-11      | 240          |
| waist circumference                              | 7.21    | 8.80E-13  | 6.00E-11      | 155          |
| systemic lupus erythematosus                     | 7.15    | 1.10E-12  | 7.10E-11      | 277          |
| glucose measurement                              | 7.12    | 1.50E-12  | 9.00E-11      | 183          |
| kidney disease                                   | 7.09    | 1.70E-12  | 9.90E-11      | 233          |

|                                                      |      |          |          |     |
|------------------------------------------------------|------|----------|----------|-----|
| metabolic syndrome                                   | 6.81 | 1.00E-11 | 5.60E-10 | 54  |
| blood metabolite measurement                         | 6.54 | 6.70E-11 | 3.50E-09 | 163 |
| neuropsychological test                              | 6.45 | 1.30E-10 | 6.50E-09 | 80  |
| total cholesterol measurement                        | 6.35 | 2.10E-10 | 9.80E-09 | 251 |
| intraocular pressure measurement                     | 6.28 | 3.00E-10 | 1.40E-08 | 268 |
| inflammatory skin disease                            | 6.19 | 5.10E-10 | 2.30E-08 | 277 |
| membranous glomerulonephritis                        | 5.8  | 7.80E-10 | 3.30E-08 | 21  |
| intestinal disease                                   | 6.12 | 9.50E-10 | 3.60E-08 | 87  |
| malabsorption syndrome                               | 6.12 | 9.50E-10 | 3.60E-08 | 87  |
| celiac disease                                       | 6.12 | 9.50E-10 | 3.60E-08 | 87  |
| psoriasis                                            | 6.08 | 1.00E-09 | 3.70E-08 | 232 |
| serum metabolite measurement                         | 6.1  | 1.10E-09 | 3.70E-08 | 91  |
| spondyloarthropathy                                  | 6.06 | 1.20E-09 | 4.10E-08 | 169 |
| ankylosing spondylitis                               | 6.06 | 1.20E-09 | 4.10E-08 | 169 |
| coronary heart disease                               | 5.96 | 1.90E-09 | 6.30E-08 | 349 |
| fasting blood glucose measurement                    | 5.89 | 3.50E-09 | 1.10E-07 | 70  |
| hip circumference                                    | 5.89 | 3.60E-09 | 1.10E-07 | 100 |
| attention deficit hyperactivity disorder             | 5.82 | 4.80E-09 | 1.40E-07 | 183 |
| chronic kidney disease                               | 5.77 | 6.70E-09 | 1.90E-07 | 127 |
| hair morphology                                      | 5.71 | 6.70E-09 | 1.90E-07 | 34  |
| body ratio measurement                               | 5.48 | 3.20E-08 | 8.60E-07 | 166 |
| BMI-adjusted waist circumference                     | 5.33 | 7.40E-08 | 0.000002 | 96  |
| low density lipoprotein cholesterol measurement      | 5.23 | 1.20E-07 | 0.000003 | 200 |
| endocrine neoplasm                                   | 5.21 | 1.30E-07 | 3.3E-06  | 162 |
| sclerosing cholangitis                               | 5.18 | 1.50E-07 | 3.8E-06  | 138 |
| cis/trans-18:2 fatty acid measurement                | 5.1  | 1.80E-07 | 4.5E-06  | 31  |
| mean arterial pressure                               | 4.99 | 4.00E-07 | 9.5E-06  | 127 |
| waist-hip ratio                                      | 4.96 | 4.80E-07 | 0.000011 | 137 |
| cardiac arrest                                       | 4.92 | 4.90E-07 | 0.000011 | 34  |
| sudden cardiac arrest                                | 4.92 | 4.90E-07 | 0.000011 | 34  |
| glycerophospholipid measurement                      | 4.61 | 8.70E-07 | 0.000019 | 16  |
| conduct disorder                                     | 4.81 | 9.10E-07 | 0.00002  | 40  |
| information processing speed                         | 4.72 | 9.70E-07 | 0.00002  | 23  |
| fetal hemoglobin measurement                         | 4.41 | 2.3E-06  | 0.000047 | 15  |
| thyroid disease                                      | 4.56 | 0.000003 | 0.000062 | 89  |
| metabolic disease                                    | 4.51 | 3.7E-06  | 0.000072 | 617 |
| trans/trans-18:2 fatty acid measurement              | 4.5  | 3.7E-06  | 0.000072 | 35  |
| glycoprotein measurement                             | 4.51 | 3.9E-06  | 0.000075 | 102 |
| age at menarche                                      | 4.48 | 4.4E-06  | 0.000083 | 117 |
| age at menopause                                     | 4.39 | 6.5E-06  | 0.00012  | 61  |
| function                                             | 4.08 | 7.9E-06  | 0.00014  | 12  |
| liver neoplasm                                       | 4.33 | 8.6E-06  | 0.00016  | 85  |
| open-angle glaucoma                                  | 4.28 | 0.00001  | 0.00018  | 53  |
| QRS complex                                          | 4.24 | 0.000012 | 0.00021  | 42  |
| stroke                                               | 4.24 | 0.000013 | 0.00021  | 94  |
| coronary artery disease                              | 4.2  | 0.000014 | 0.00024  | 265 |
| C-reactive protein measurement                       | 4.2  | 0.000015 | 0.00025  | 75  |
| type I diabetes mellitus                             | 4.19 | 0.000015 | 0.00025  | 110 |
| A1C measurement                                      | 4.16 | 0.000017 | 0.00027  | 59  |
| BMI-adjusted waist-hip ratio                         | 4.15 | 0.000018 | 0.00028  | 102 |
| very low density lipoprotein cholesterol measurement | 4.04 | 0.000018 | 0.00028  | 17  |
| puberty                                              | 3.85 | 0.000022 | 0.00033  | 11  |
| height growth measurement                            | 3.85 | 0.000022 | 0.00033  | 11  |
| Sarcoidosis                                          | 3.97 | 0.000032 | 0.00048  | 26  |
| cirrhosis of liver                                   | 4    | 0.000034 | 0.0005   | 73  |
| optic disc measurement                               | 3.99 | 0.000035 | 0.00052  | 70  |
| ACPA-positive rheumatoid arthritis                   | 3.76 | 0.000041 | 0.00058  | 12  |
| allergy                                              | 3.91 | 0.000049 | 0.0007   | 170 |
| diastolic blood pressure                             | 3.88 | 0.000054 | 0.00076  | 330 |
| ventricular rate measurement                         | 3.84 | 0.000055 | 0.00076  | 28  |

|                                                         |      |          |         |     |
|---------------------------------------------------------|------|----------|---------|-----|
| thyroid neoplasm                                        | 3.78 | 0.00006  | 0.00081 | 19  |
| thyroid carcinoma                                       | 3.78 | 0.00006  | 0.00081 | 19  |
| platelet aggregation                                    | 3.69 | 0.000061 | 0.00081 | 13  |
| motor neuron disease                                    | 3.72 | 0.0001   | 0.0013  | 93  |
| amyotrophic lateral sclerosis                           | 3.72 | 0.0001   | 0.0013  | 93  |
| free cholesterol measurement                            | 3.6  | 0.00011  | 0.0014  | 16  |
| systemic scleroderma                                    | 3.66 | 0.00012  | 0.0015  | 41  |
| Connective tissue disease with eye involvement          | 3.66 | 0.00012  | 0.0015  | 41  |
| scleroderma                                             | 3.66 | 0.00012  | 0.0015  | 41  |
| neoplasm of mature B-cells                              | 3.65 | 0.00013  | 0.0016  | 125 |
| bladder carcinoma                                       | 3.58 | 0.00013  | 0.0016  | 19  |
| MHC class I polypeptide-related sequence B measurement  | 3.34 | 0.00016  | 0.0019  | 9   |
| alcohol dependence measurement                          | 3.56 | 0.00018  | 0.0021  | 41  |
| sex interaction measurement                             | 3.55 | 0.00019  | 0.0022  | 63  |
| emphysema pattern measurement                           | 3.42 | 0.00019  | 0.0022  | 13  |
| chronic hepatitis B infection                           | 3.42 | 0.00019  | 0.0022  | 13  |
| HOMA-B                                                  | 3.38 | 0.00024  | 0.0028  | 15  |
| complement C4 measurement                               | 3.26 | 0.00026  | 0.0029  | 10  |
| Hashimoto's thyroiditis                                 | 3.26 | 0.00026  | 0.0029  | 10  |
| hair color                                              | 3.38 | 0.00027  | 0.003   | 18  |
| microbiome measurement                                  | 3.42 | 0.0003   | 0.0033  | 89  |
| gut microbiome measurement                              | 3.42 | 0.0003   | 0.0033  | 89  |
| cutaneous psoriasis measurement                         | 3.07 | 0.00043  | 0.0045  | 8   |
| Hypertriglyceridemia                                    | 3.07 | 0.00043  | 0.0045  | 8   |
| oppositional defiant disorder measurement               | 3.22 | 0.00049  | 0.0051  | 20  |
| docosapentaenoic acid measurement                       | 3.16 | 0.00054  | 0.0057  | 15  |
| QRS amplitude                                           | 3.19 | 0.00058  | 0.006   | 25  |
| psoriasis vulgaris                                      | 3.13 | 0.00069  | 0.0071  | 23  |
| glomerular filtration rate                              | 3.17 | 0.00072  | 0.0073  | 110 |
| attempted suicide                                       | 3.11 | 0.00077  | 0.0077  | 27  |
| carbohydrate measurement                                | 2.95 | 0.00085  | 0.0084  | 10  |
| myositis                                                | 3.02 | 0.00093  | 0.0092  | 19  |
| Chronic Hepatitis C infection                           | 2.98 | 0.001    | 0.01    | 17  |
| hematocrit                                              | 3.04 | 0.0011   | 0.01    | 97  |
| optic disc size measurement                             | 3.01 | 0.0011   | 0.01    | 28  |
| overweight body mass index status                       | 2.98 | 0.0011   | 0.01    | 23  |
| peripheral nervous system disease                       | 2.92 | 0.0011   | 0.01    | 13  |
| neuroblastoma                                           | 2.92 | 0.0011   | 0.01    | 13  |
| response to risperidone                                 | 2.92 | 0.0011   | 0.01    | 13  |
| serum creatinine measurement                            | 3.03 | 0.0011   | 0.011   | 95  |
| chronic lymphocytic leukemia                            | 3    | 0.0012   | 0.011   | 56  |
| blood urea nitrogen measurement                         | 2.96 | 0.0013   | 0.012   | 33  |
| male reproductive system disease                        | 2.95 | 0.0015   | 0.014   | 214 |
| age at assessment                                       | 2.89 | 0.0017   | 0.015   | 51  |
| alcohol dependence                                      | 2.87 | 0.0019   | 0.017   | 90  |
| optic cup area measurement                              | 2.81 | 0.002    | 0.017   | 26  |
| N-glycan measurement                                    | 2.68 | 0.002    | 0.017   | 9   |
| acquired metabolic disease                              | 2.68 | 0.002    | 0.017   | 9   |
| amyloidosis                                             | 2.68 | 0.002    | 0.017   | 9   |
| AL amyloidosis                                          | 2.68 | 0.002    | 0.017   | 9   |
| Rare familial disorder with hypertrophic cardiomyopathy | 2.68 | 0.002    | 0.017   | 9   |
| seasonal gut microbiome measurement                     | 2.8  | 0.0022   | 0.018   | 37  |
| RR interval                                             | 2.71 | 0.0022   | 0.018   | 14  |
| D dimer measurement                                     | 2.67 | 0.0022   | 0.018   | 10  |
| non-alcoholic fatty liver disease                       | 2.77 | 0.0023   | 0.019   | 31  |
| panic disorder                                          | 2.67 | 0.0023   | 0.019   | 11  |
| drinking behavior                                       | 2.8  | 0.0024   | 0.02    | 142 |
| brain volume measurement                                | 2.77 | 0.0026   | 0.02    | 73  |
| biliary liver cirrhosis                                 | 2.74 | 0.0027   | 0.021   | 47  |

|                                                |      |        |       |     |
|------------------------------------------------|------|--------|-------|-----|
| omega-6 polyunsaturated fatty acid measurement | 2.72 | 0.0028 | 0.022 | 40  |
| estrogen-receptor negative breast cancer       | 2.7  | 0.003  | 0.024 | 46  |
| genomic measurement                            | 2.65 | 0.0033 | 0.025 | 31  |
| refractive error measurement                   | 2.66 | 0.0035 | 0.027 | 77  |
| lean body mass                                 | 2.51 | 0.0041 | 0.031 | 14  |
| telomere length                                | 2.55 | 0.0042 | 0.032 | 26  |
| alcohol drinking                               | 2.59 | 0.0044 | 0.033 | 129 |
| heart failure                                  | 2.55 | 0.0045 | 0.033 | 36  |
| aortic aneurysm                                | 2.45 | 0.0046 | 0.034 | 12  |
| Vitiligo                                       | 2.53 | 0.0048 | 0.036 | 42  |
| adhesion molecule measurement                  | 2.4  | 0.0049 | 0.036 | 10  |
| response to beta blocker                       | 2.51 | 0.005  | 0.037 | 35  |
| chin morphology measurement                    | 2.46 | 0.0053 | 0.039 | 24  |
| HIV-1 infection                                | 2.47 | 0.0062 | 0.044 | 96  |
| phospholipid measurement                       | 2.4  | 0.0065 | 0.046 | 44  |
| melanoma                                       | 2.38 | 0.0067 | 0.048 | 25  |
| large artery stroke                            | 2.37 | 0.0068 | 0.048 | 22  |

### Development of model for clinical group prediction

#### Polygenic Scores (PS)

All SNPs, weights, and code for generating new predictions for the CT-PS and SCT-PS can be found at [www.github.com/rotroff-lab/accord-C4-ps](https://www.github.com/rotroff-lab/accord-C4-ps).

A comparison between the GWAS effect sizes and the SCT-PS effect sizes is given in Figure S11. Boxplots of SCT-PS (Fig. S12) by cluster assignment show that C4 has a significantly higher mean SCT-PS than the other groups.

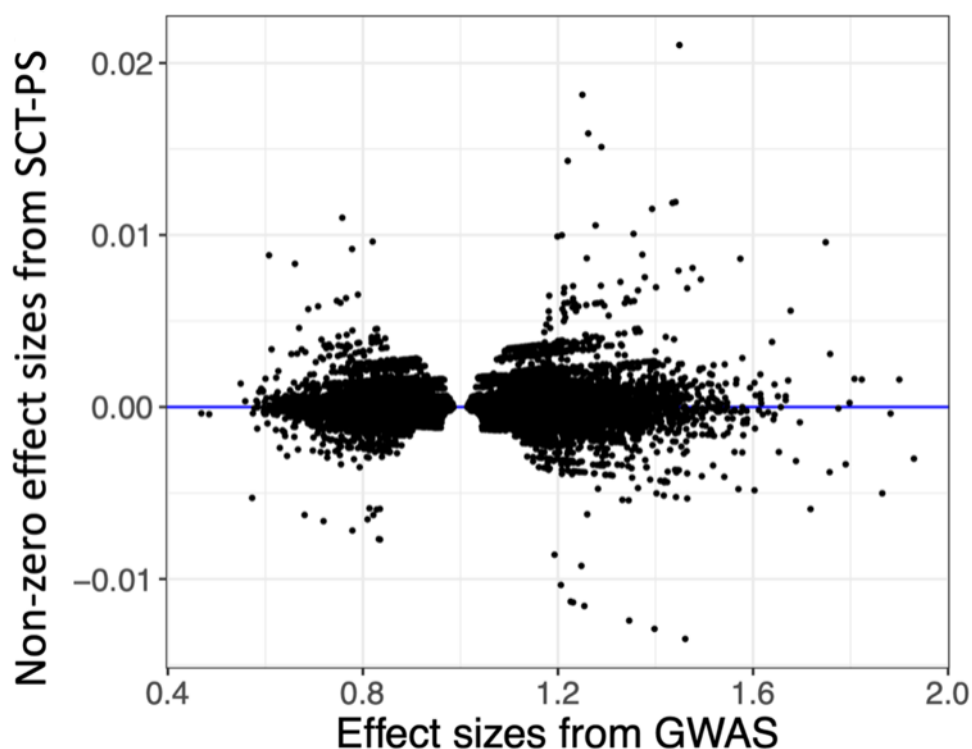

**Figure S11. Comparison between effects sizes from GWAS and SCT- PS.**

Non-zero effect sizes are compared between SCT-PS (y-axis) and genome-wide association study (GWAS) (x-axis).



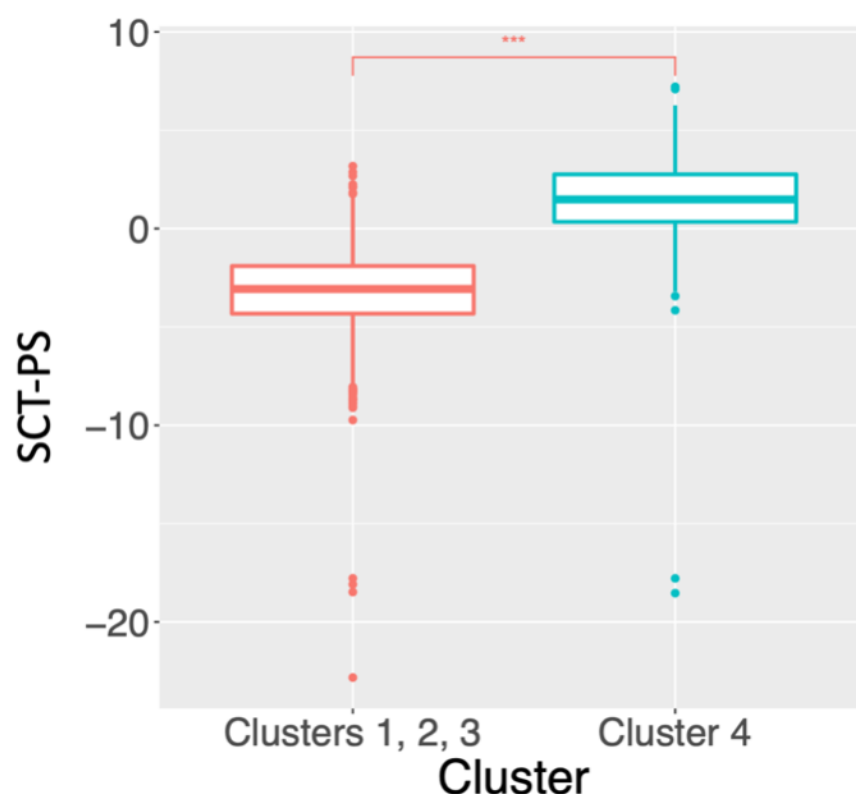

**Figure S12. Box plots for SCT-PS by clinical group assignment.**

#### Model training

The CT-PS and SCT-PS with and without baseline clinical variables were used to construct multiple models in order to evaluate which approach performed best to predict individual clinical group membership. The cohort randomized to receive intensive glycemia treatment and that consented to genetic studies was divided into a training set (N=2,270) and a test set (N=1,169). A 10-fold cross-validation procedure was performed for each modeling approach to prevent overfitting on the training set. The baseline clinical variables and the pairwise interaction terms between the CT-PS and SCT-PS and each baseline clinical variables were included in the variable selection procedure using least absolute shrinkage and selection operator (LASSO) was used to select an optimal subset of the covariates for each model.<sup>14</sup> Selected variables were then used in a generalized linear model (GLM) with a logit link function (i.e., logistic regression). Each model was evaluated using CT/SCT-PS only, baseline clinical variables only, or the CT/SCT-PS and baseline clinical variables. Model performance was assessed based on the area under the receiver operating characteristic curve (AUC), sensitivity, specificity, positive predictive value (PPV), negative predictive value (NPV), and balanced accuracy. PPV is the ratio of true positives out of all identified positives. NPV is the ratio of true negatives out of all identified negatives.

Covariates were selected using LASSO and are shown in Table S12. Testing accuracy metrics for each model are shown in Table S13. Boxplots of the 10-fold cross-validation results between each model are shown in Figure S13. Models that incorporated the PS either with or without baseline clinical factors outperformed models with only clinical variables (Table S13). GLMs incorporating PS and clinical factors negligibly outperformed models with PS only, with AUCs of 0.98 and 0.99, respectively (Table S13). The SCT-PS model with clinical variables performed the best on the testing set (AUC=0.99), with sensitivity, specificity, and balanced accuracy of 96%, 94%, and 95%, respectively. The SCT-PS without clinical variables also performed well (AUC=0.98), with sensitivity, specificity, and balanced accuracy of 95%, 93%, and 94%, respectively. Due to a negligible increase in model performance and to maintain model parsimony and transparency, the SCT-PS without clinical variables was considered to be the best model, however, both are presented in the main text (Fig. 4D).

**Table S12. Clinical and demographic covariates selected by LASSO.**

|                                    |                          |                                 |
|------------------------------------|--------------------------|---------------------------------|
| Sulfonylurea                       | Biguanide                | Any Insulin Use                 |
| Thiazolidinedione                  | Diabetes Medications*    | Years since diabetes diagnosis* |
| Waist size (cm)                    | Platelet AGI             | Anti-depressant medication      |
| Other Drugs                        | HDL*                     | BMI                             |
| Cardiovascular disease at baseline | AG Inhibitor*            | Fibrate*                        |
| Herbal Medication*                 | LDL*                     | FPG*                            |
| Potassium*                         | Years with dyslipidemia* |                                 |

\*Includes interaction term with SCT-PS

**Table S13. Model performance for predicting C4 membership.**

| Model  | Variables                   | Sensitivity | Specificity | Positive Predictive Value (PPV) | Negative Predictive Value (NPV) | Balanced Accuracy | AUC  |
|--------|-----------------------------|-------------|-------------|---------------------------------|---------------------------------|-------------------|------|
| GLM    | Clinical Variables Only     | 0.72        | 0.56        | 0.41                            | 0.82                            | 0.64              | 0.67 |
| CT-PS  | CT-PS                       | 0.77        | 0.78        | 0.60                            | 0.89                            | 0.77              | 0.82 |
|        | CT-PS + Clinical Variables  | 0.76        | 0.87        | 0.71                            | 0.89                            | 0.81              | 0.88 |
| SCT-PS | SCT-PS                      | 0.95        | 0.93        | 0.85                            | 0.98                            | 0.94              | 0.98 |
|        | SCT-PS + Clinical Variables | 0.96        | 0.94        | 0.87                            | 0.98                            | 0.95              | 0.99 |

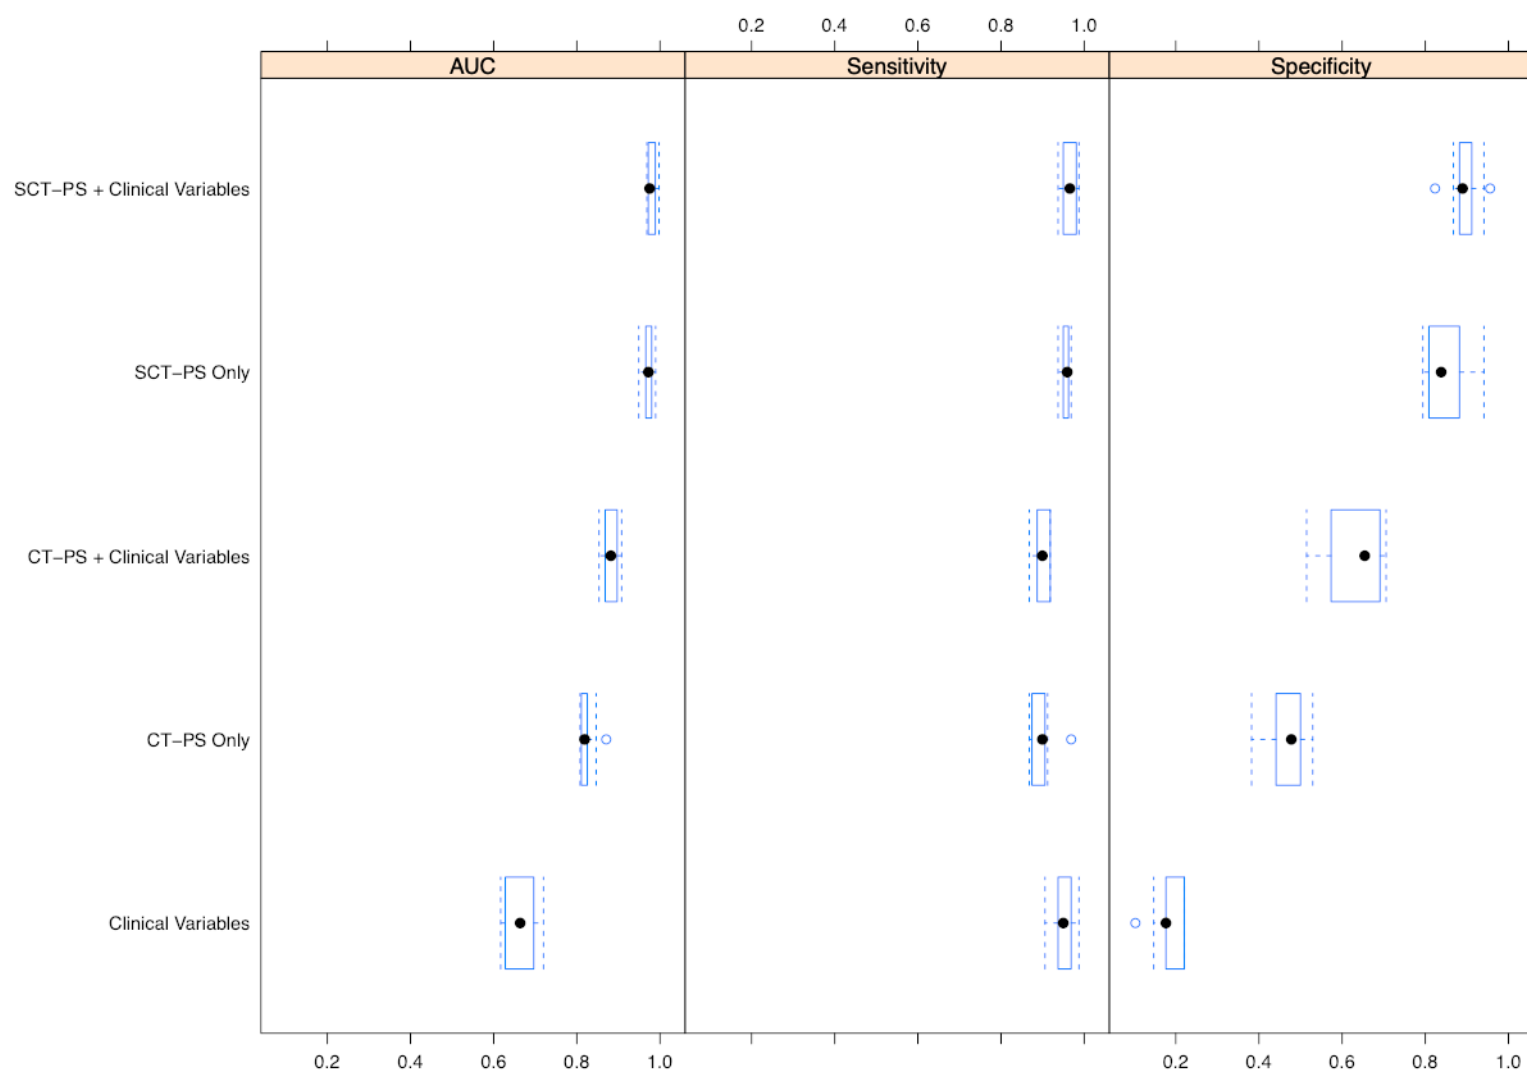

**Figure S13. Boxplots of 10-fold cross-validation results.**

### Assessment of model for clinical group prediction

#### Propensity Score Matching

The process, described in supplemental methods, resulted in 2,060 individuals which were then split into a training and test set of 1,368 and 692 individuals each. A GLM using both the SCT-PS and clinical variables chosen in the full model was trained on the matched training set and then predicted the match test set. The predictions resulted in an AUC of 98%. The similar AUC to the previous testing accuracy suggests that the predictive models are not relying on cohort differences such as age, sex, race, or years since T2D to predict clinical group membership.

#### Mendelian Randomization

The individual and meta-analyzed results of mendelian randomization, described in supplemental methods, are shown in Figure S14. The intensive treatment arm exhibited the only significant IVW results, suggesting that there is a causal relationship between glycemia reduction and CVD outcomes but only through interaction of SCT-PS and treatment.

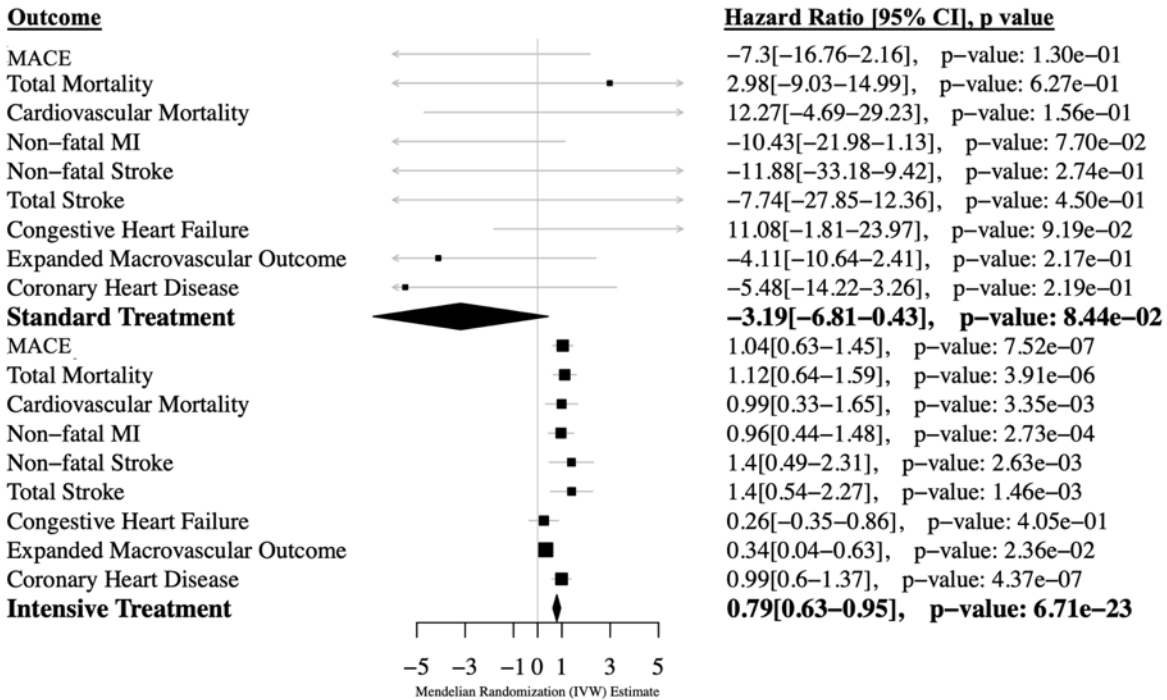

**Figure S14. Forest plot showing causal inference of median HbA1c as the exposure variable on CVD risk with SCT-PS as the instrumental variable.**

The direction of the IVW estimate is based on the slope of a line fit through the estimate of the SCT-PS association with median HbA1c (x) and the estimate of the SCT-PS association with the CVD outcome (y) and through the origin. For the intensive treatment, these estimates for both x and y above are located in the bottom left quadrant and fitting a line through that point and the origin results in a positive slope, and is reflected in the direction of the IVW estimate.

#### Effect of sample size adjustment on observed risk differences

There was some instability noted with smaller sample sizes ( $n=194$  in each group) with the SCT-PS only model (Fig. S13); however, with  $n=389$  in the intensive arm and  $778$  in the standard arm, 12 out of the 20 (60%) of the iterations were significant ( $P<.05$ ). Once the sample sizes reached  $n=389$  in the intensive arm and  $1167$  in the standard arm, 15 out of 20 (75%) were statistically significant ( $P<.05$ ). Importantly, regardless of the sample sizes, all the effect sizes were consistently in the direction of a reduction in risk with intensive treatment, suggesting that the instances where there was a lack of statistical significance was due to a loss of power from the small sample sizes.

The results for the SCT-PS with clinical features (Fig. S16, were similar to those of the SCT-PS only (Fig. S15). However, the the SCT-PS with clinical variables model failed to reach statistical significance for nearly all iterations, suggesting that it has reduced power compared to the model with SCT-PS alone.

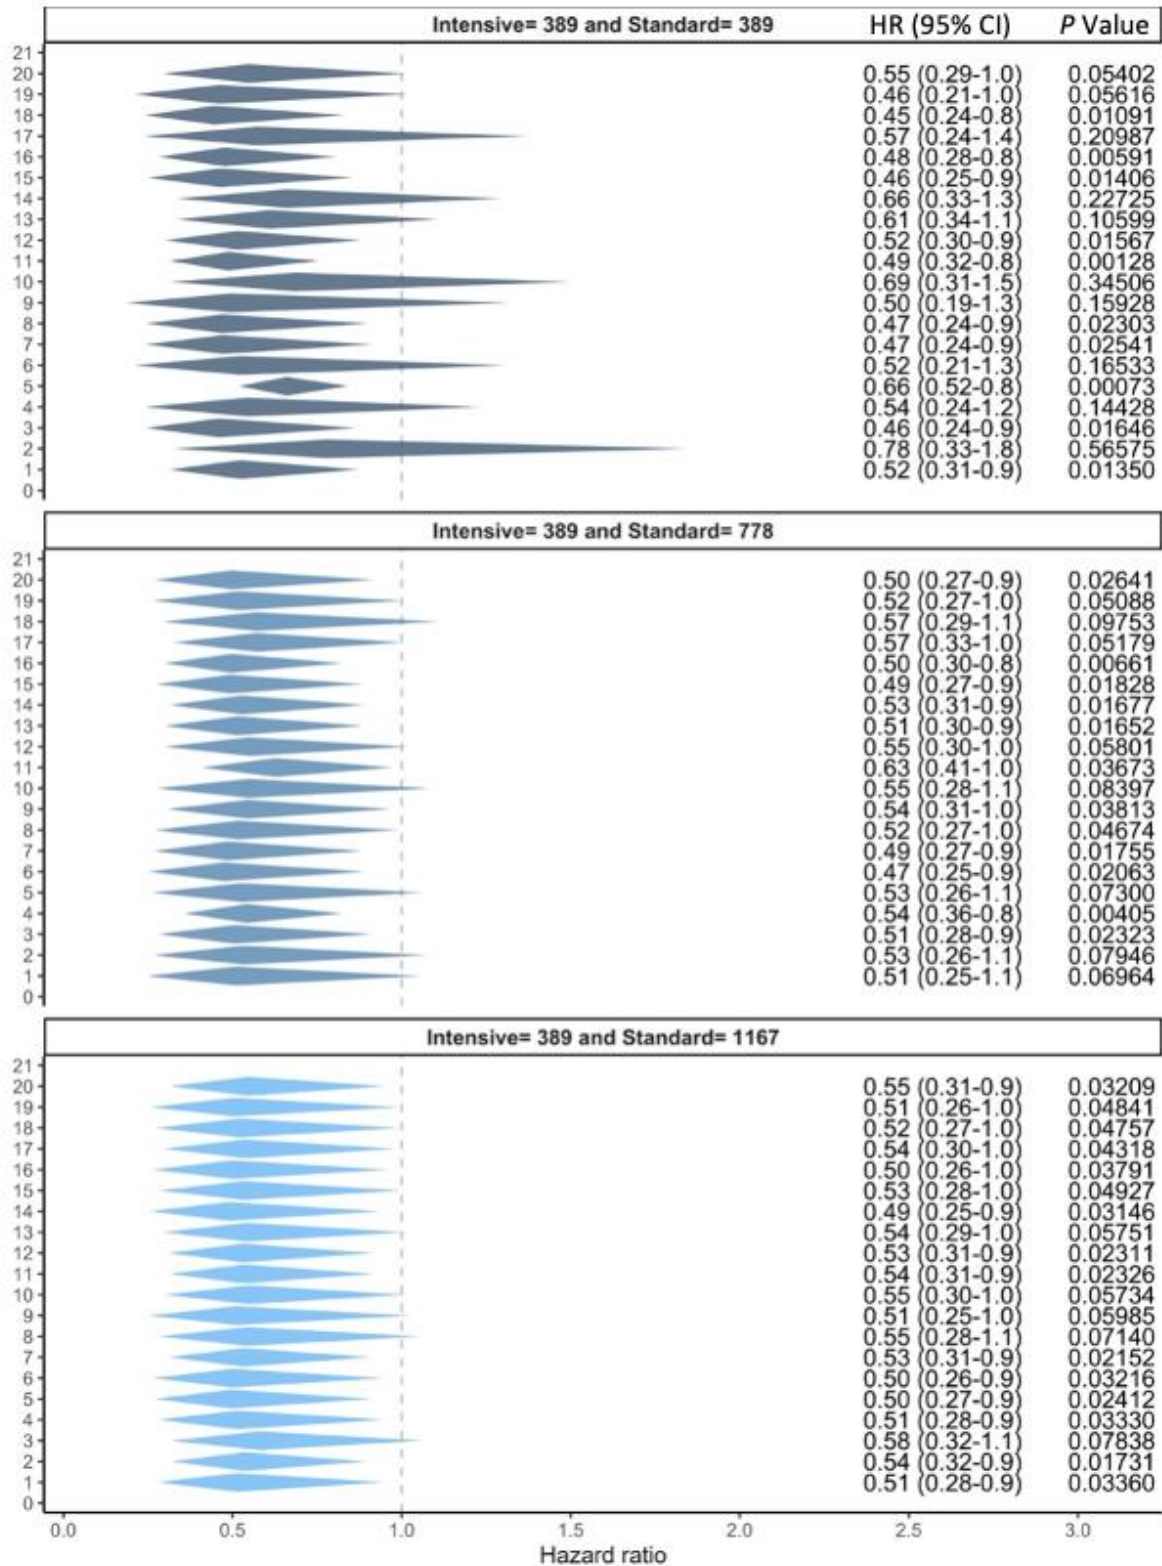

Figure S15. Meta-analyzed risk differences of the SCT-PS model only (no clinical features) between varied sample sizes for predicted intensive and standard groups.

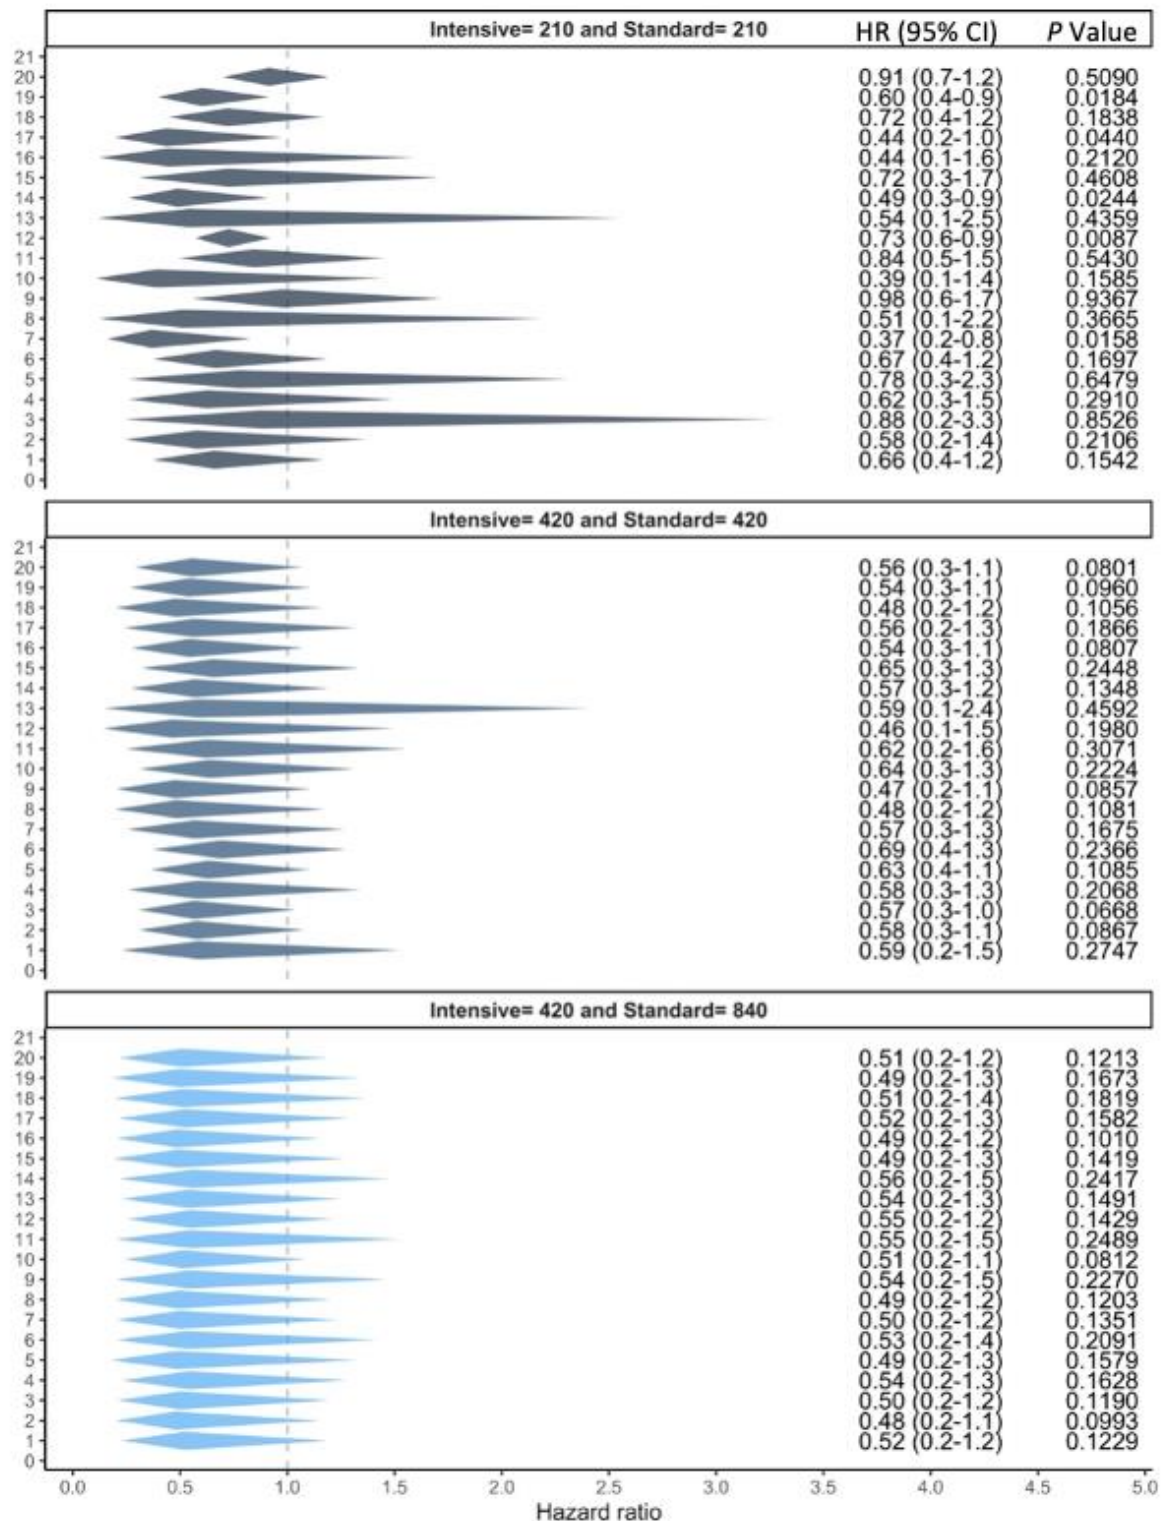

Figure S16. Meta-analyzed risk differences of the SCT-PS model with clinical features between varied sample sizes for predicted intensive and standard groups.

SCT-PS predicted **non-C4** CVD Risk for Intensive versus Standard Treatment

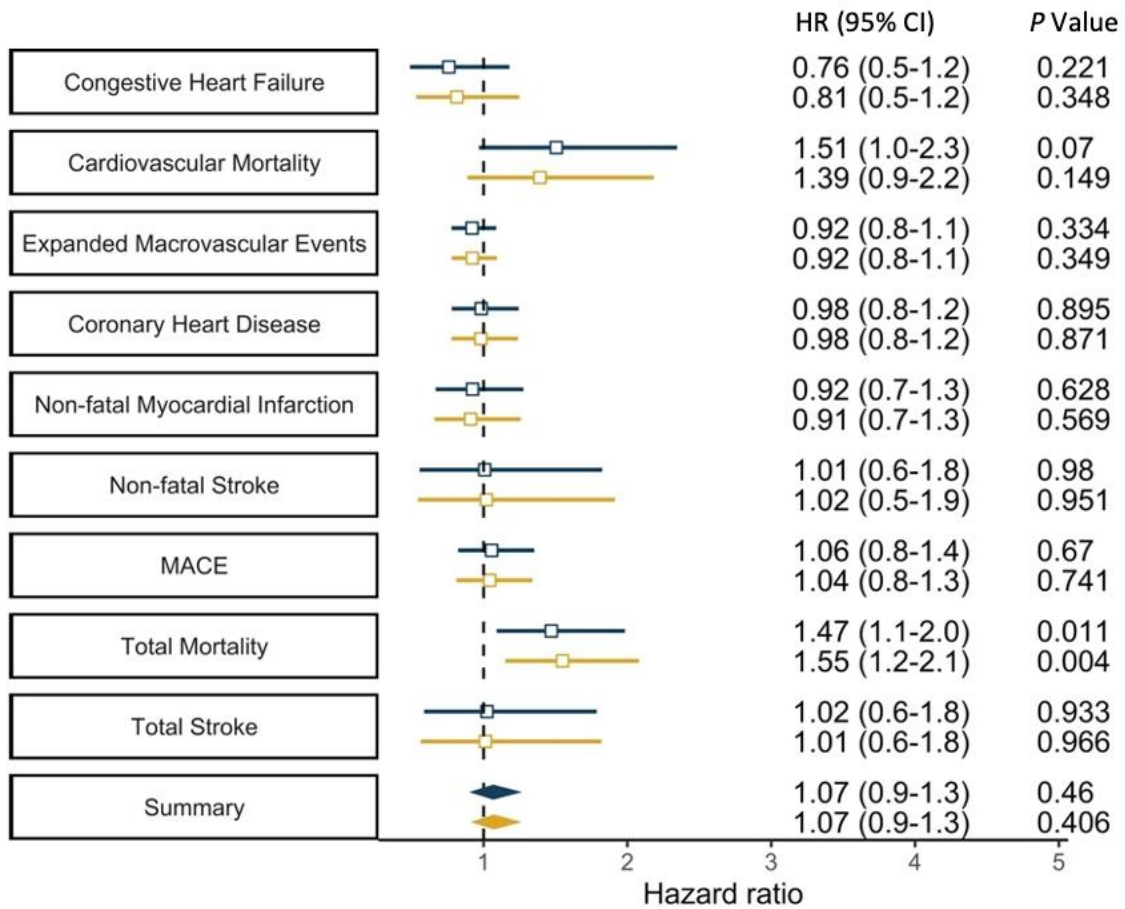

SCT-PRS
 SCT-PRS and Clinical Features

**Figure S17. Meta-analyzed risk differences of intensive versus standard treatment of the SCT-PS model for individuals predicted to not be members of C4.**



# SCT-PS Stratification by Race

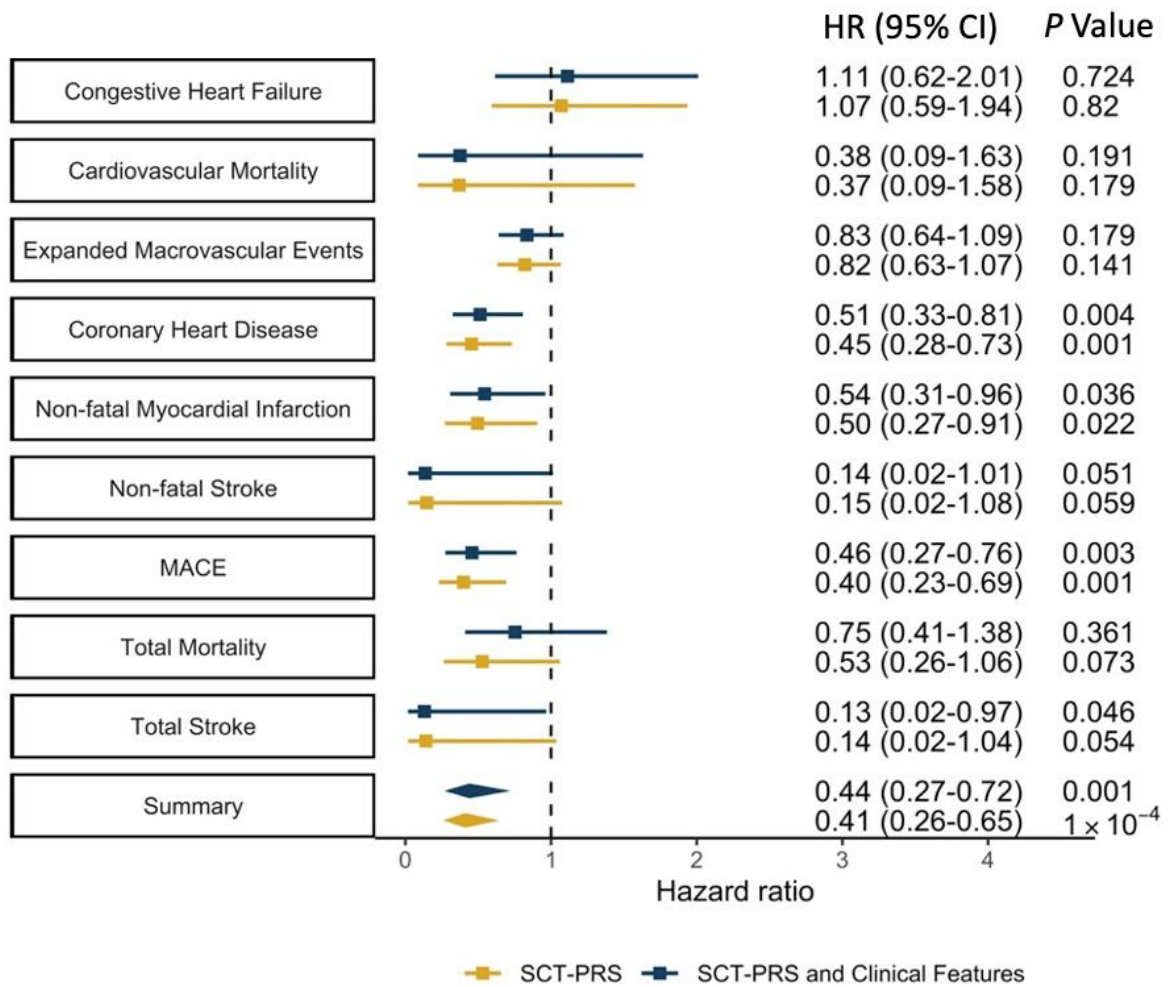

**Figure S18. Forest plot of hazard ratios (HR) between of individuals that self-identified as White that were predicted to be in the C4 clinical group based on the SCT-PS that received intensive glycemia treatment compared to those that received standard treatment.**



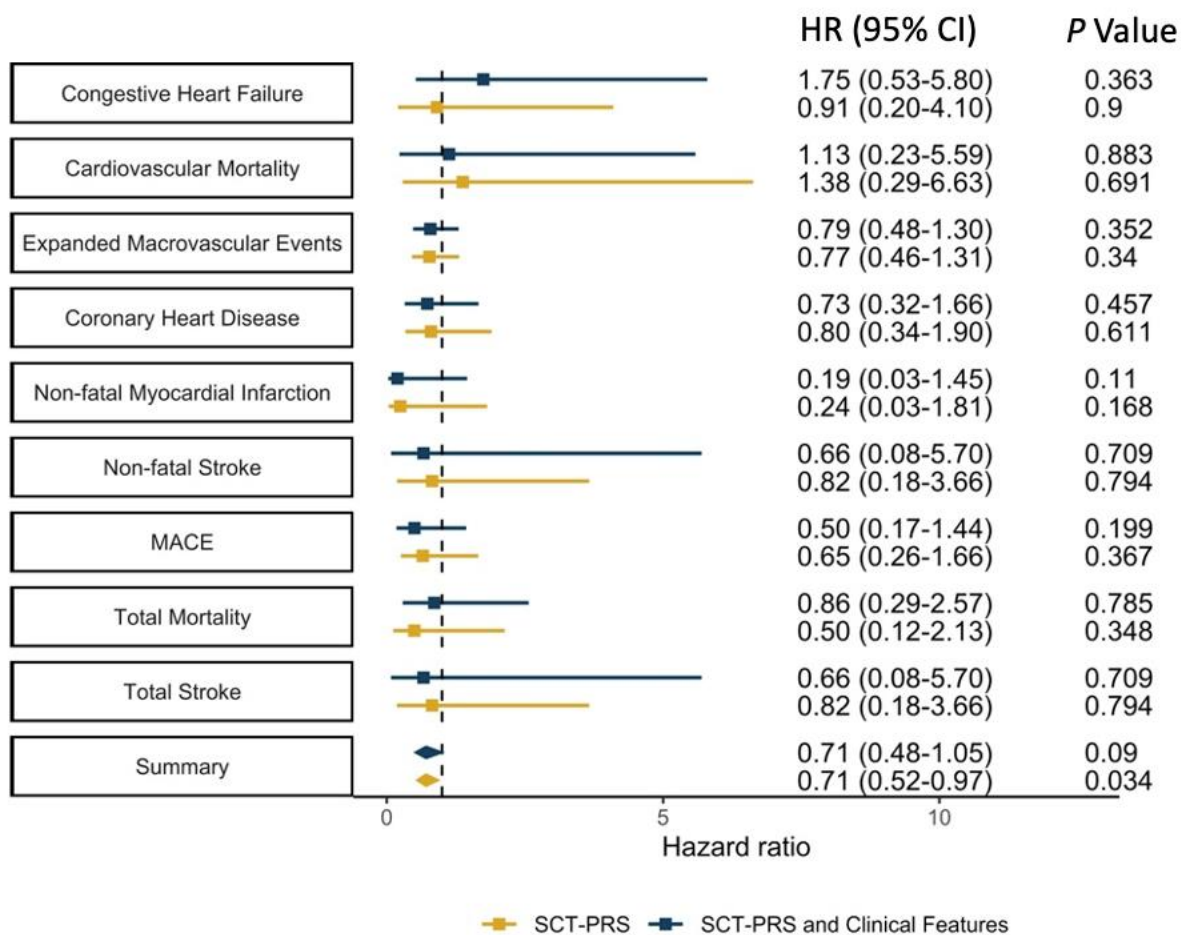

**Figure S19. Forest plot of hazard ratios (HR) between of individuals that self-identified as non-White that were predicted to be in the C4 clinical group based on the SCT-PS that received intensive glycemia treatment compared to those that received standard treatment.**

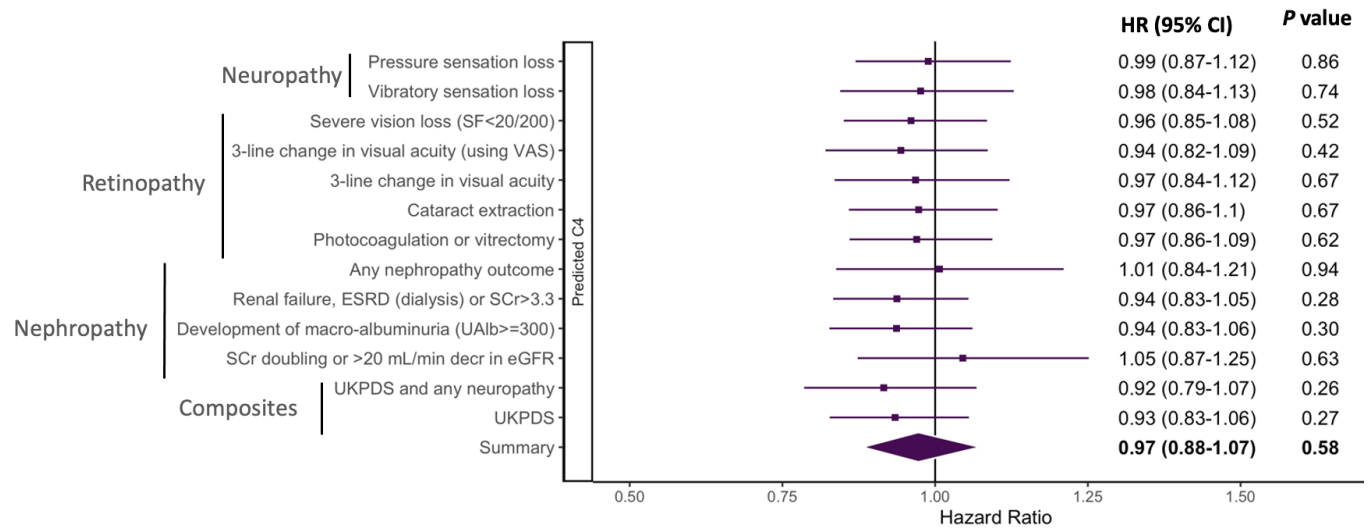

**Figure S20. Forest plot of hazard ratios (HR) for microvascular events between predicted C4 in intensive arm and predicted C4 in standard arm.**

SCT-PRS was applied to the withheld test set in intensive arm and the whole standard arm. Cox proportional hazards models ascertained risk of individuals outcomes in predicted C4 in intensive arm compared to predicted C4 in standard arm. Summary of risk was calculated using R metafor package while accounting for covariances of outcomes. In the plot, SF, VAS, ESRD, SCr, UAlb, eGFR and UKPDS are abbreviations for Snellen fraction, visual acuity scale, end-stage renal disease, serum creatinine, urine albumin, estimate glomerular filtration rate and UKPDS composite (i.e. retinopathy requiring photocoagulation, vitreous hemorrhage and renal failure), respectively.

### Direct Prediction of CVD Outcomes

In order to compare the efficacy of predicting cluster membership as a proxy for risk of an adverse outcome compared to predicting CVD outcomes directly, SCT-PS model with baseline clinical variables and a GLM of only baseline clinical values were assessed to determine if they could be trained to predict MACE and total mortality. The testing accuracy metrics for each model are presented in Table S14.

For MACE, GLMs with only clinical variables displayed similar balanced accuracies to the SCT-PS with clinical variables of 66% and 69%, respectively. The sensitivity and specificity for the SCT-PS and clinical variables was 67% and 70%, respectively, compared to 52% and 79% for the GLM.

For total mortality prediction, GLMs with only clinical variables had a balanced accuracy of 67% compared to 71% for the SCT-PS with clinical variables. The sensitivity and specificity for the SCT-PS and clinical variables was 80% and 61%, respectively, compared to 64% and 71% for the GLM. Overall, although the SCT-PS did reasonably well predicting MACE and total mortality, the predictions for C4 substantially outperformed this suggesting that predicting cluster membership may be more feasible than predicting outcomes directly.

**Table S14. Model accuracy for directly predicting MACE and total mortality outcomes.**

| Outcome         | Model                       | Sensitivity | Specificity | Balanced Accuracy | AUC  |
|-----------------|-----------------------------|-------------|-------------|-------------------|------|
| MACE            | GLM Clinical Variables Only | 0.52        | 0.79        | 0.66              | 0.70 |
|                 | Clinical Variables + SCT-PS | 0.67        | 0.70        | 0.69              | 0.73 |
| Total mortality | GLM Clinical Variables Only | 0.64        | 0.71        | 0.67              | 0.72 |
|                 | Clinical Variables + SCT-PS | 0.80        | 0.61        | 0.71              | 0.77 |

### **Comparison to 2-SNP Genetic Risk Score (GRS) from Shah et al.**

The Shah et al. paper focused on White individuals only. Interestingly, in White individuals predicted to benefit using the SCT-PS, SCT-PS with clinical variables, and the 2-SNP GRS there was a significant reduction in risk with intensive glycemia treatment for all models (Fig. S21). The SCT-PS with clinical features had the smallest  $P$  value across all CVD outcomes [HR=0.37 (0.25-0.56),  $P=1.36 \times 10^{-6}$ ], followed closely by the SCT-PS only [HR=0.38 (0.26-0.57),  $P=2.31 \times 10^{-6}$ ] and the 2-SNP GRS displayed an overall reduction [HR=0.61 (0.46-0.79),  $P=2.84 \times 10^{-4}$ ]. The 95% confidence intervals overlapped across all individual outcomes and meta-analyzed outcomes, indicating that the results were not significantly different from each other at the  $P<.05$  level. However, in this analysis, both SCT-PS with and without clinical variables reached statistically significant reduction in risks ( $P<.05$ ) for expanded macrovascular events, non-fatal MI, non-fatal stroke, total, stroke, and total mortality, where the 2-SNP GRS, which was specifically developed for cardiovascular mortality in White subjects, failed to reach significance for these outcomes. In White subjects, both the 2-SNP GRS and SCT-PS with clinical features resulted in a significant reduction in cardiovascular disease mortality, whereas the SCT-PS only model failed to reach significance ( $P=.059$ ). All models resulted in significant reductions of coronary heart disease and MACE in White subjects.

Upon expanding this analysis to all individuals, regardless of race (Fig. S22), we saw a significant improvement of the SCT-PS models over the 2-SNP based on the 95% CI. The SCT-PS with clinical features performed the best on overall risk [HR=0.41 (0.29-0.56),  $P=6.54 \times 10^{-8}$ ], followed by SCT-PS only [HR=0.46 (0.33-0.64),  $P=1.36 \times 10^{-6}$ ], and the 2-SNP GRS [HR=0.73 (0.64-0.84),  $P=7.26 \times 10^{-6}$ ]. Across individual outcome risks, confidence intervals overlapped; however, significant reductions in risk using the SCT-PS were observed for patients that received intensive glycemia treatment of CVD mortality, expanded macrovascular events, non-fatal stroke, total stroke, and total mortality, where the 2-SNP GRS failed to reach significance ( $P<.05$ ) (Fig. S22). All models resulted in a displayed significant reductions in risk for patients receiving intensive glycemia treatment for coronary heart disease, non-fatal MI, and MACE ( $P<.05$ ).

Overall, there appears to be some overlapping potential utility between both of these predictive models, given that they both identified groups that significantly benefitted from intensive glycemia treatment ( $P<.05$ ) (Fig. S21-S22). However, the SCT-PS appears to have more statistical power, especially for outcomes other than cardiovascular mortality and in diverse populations, as demonstrated by the statistically significant reductions in individual CVD outcomes and the SCT-PS approaches outperformed across all CVD outcomes combined when applied to a racially diverse population.

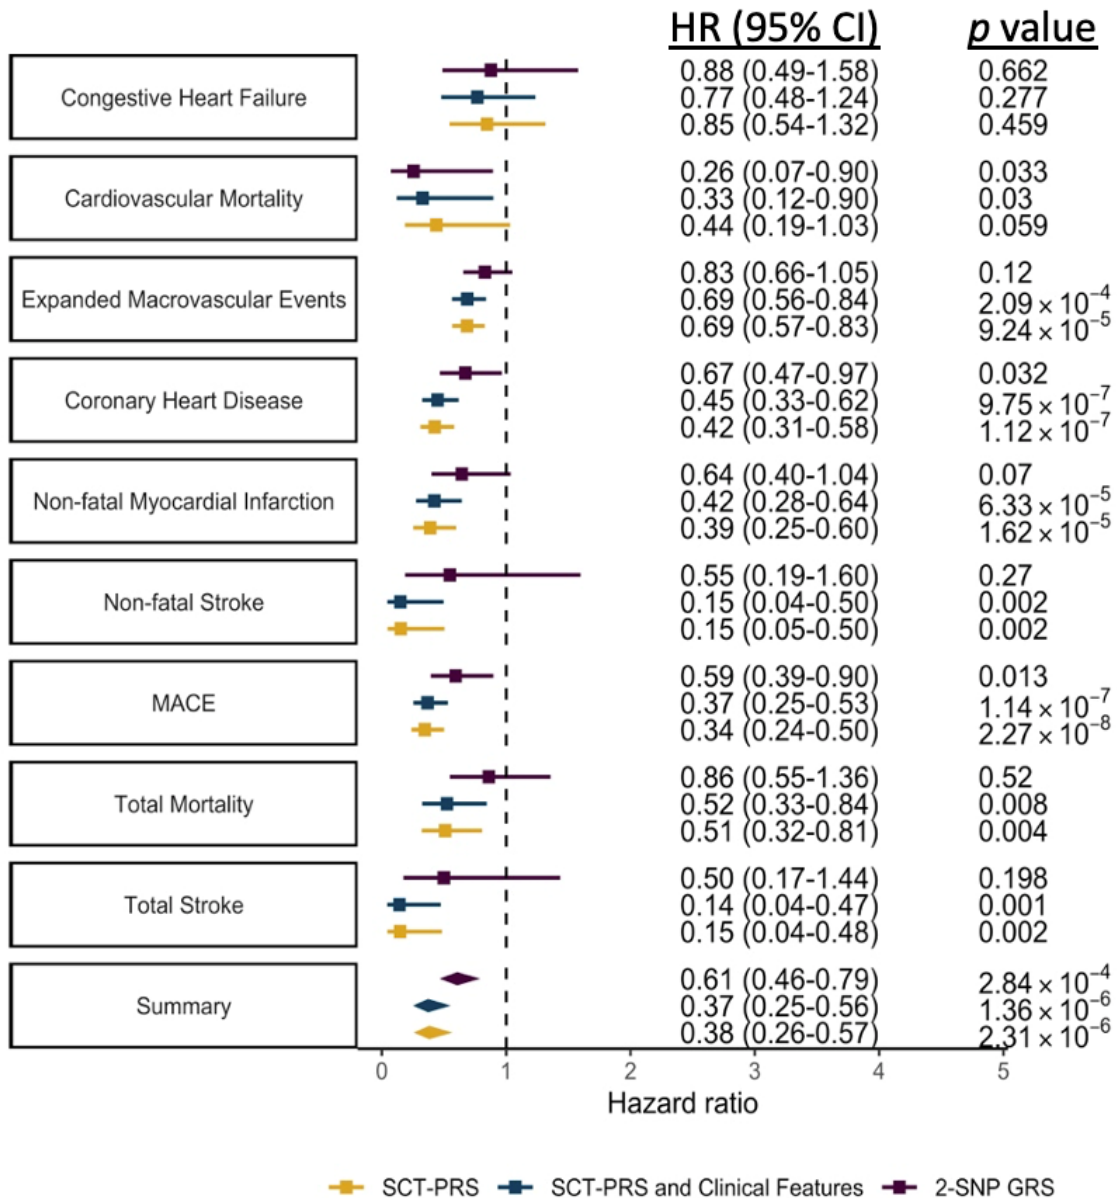

**Figure S21. Forest plot of hazard ratios (HR) between of individuals that self-identified as White that were predicted to be in the C4 clinical group based on the SCT-PS that received intensive glycemia treatment compared to those that received standard treatment and those with a 2-SNP GRS of 0, based on Shah et al.**

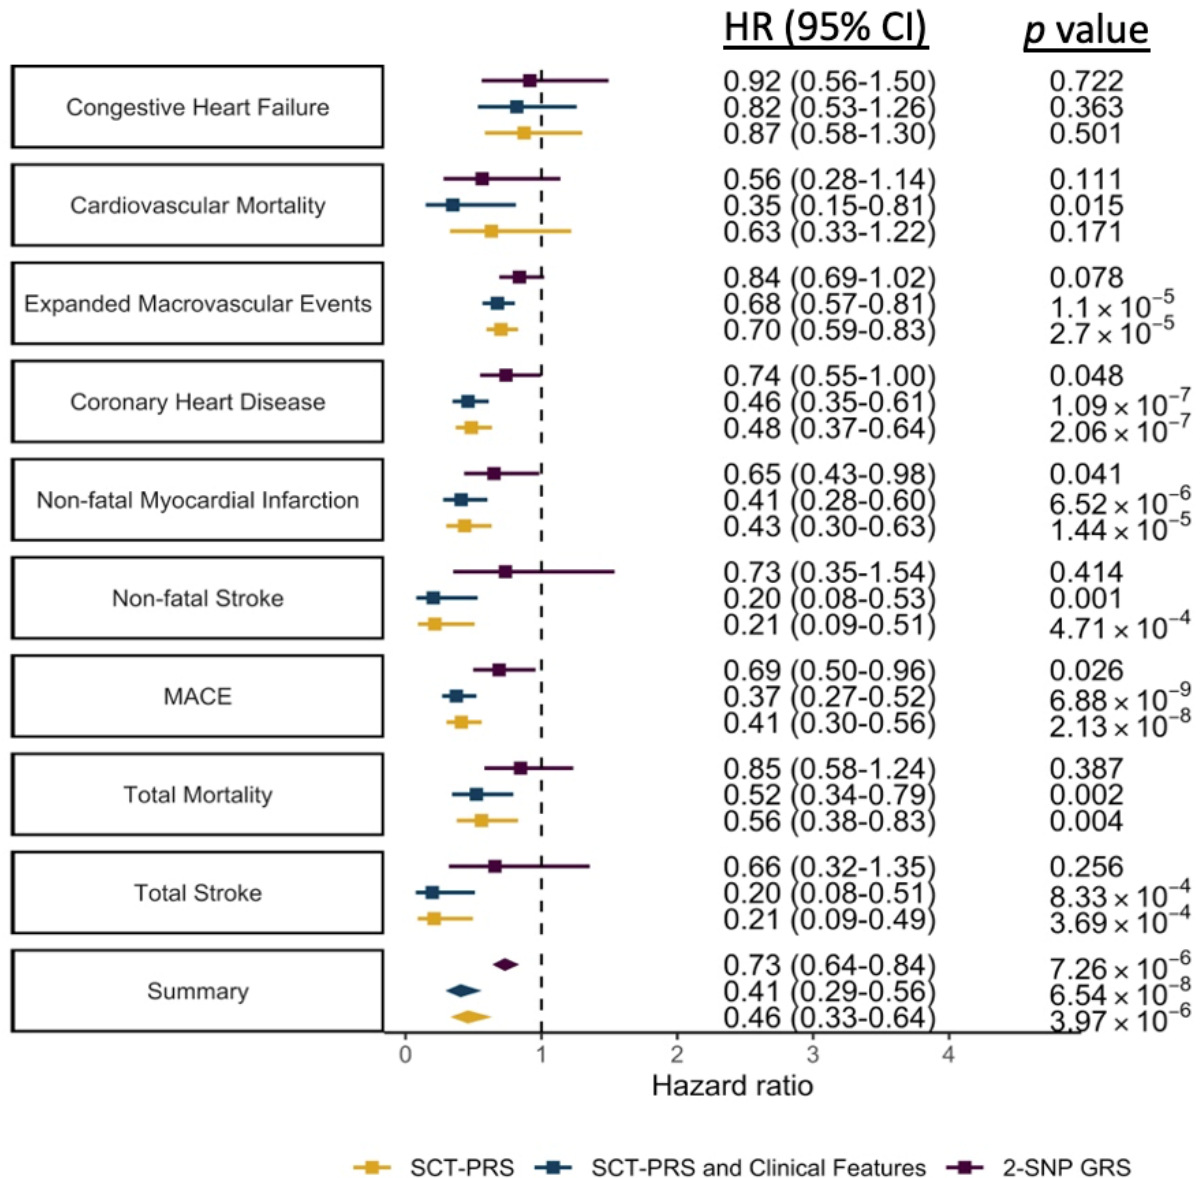

**Figure S22. Forest plot of hazard ratios (HR) between of individuals across all races that were predicted to be in the C4 clinical group based on the SCT-PS that received intensive glycemia treatment compared to those that received standard treatment and those with a 2-SNP GRS of 0, based on Shah et al.**

## References

1. Petitjean F, Ketterlin A, Gançarski P. A global averaging method for dynamic time warping, with applications to clustering. *Pattern Recognition*. 2011;44(3):678–693.
2. Keogh EJ, Pazzani MJ. Scaling up dynamic time warping for datamining applications. In: *Proceedings of the Sixth ACM SIGKDD International Conference on Knowledge Discovery and Data Mining*. ACM; 2000:285–289.
3. Petitjean F, Forestier G, Webb GI, Nicholson AE, Chen Y, Keogh E. Faster and more accurate classification of time series by exploiting a novel dynamic time warping averaging algorithm. *Knowledge and Information Systems*. 2016;47(1):1–26.
4. Rani S, Sikka G. Recent techniques of clustering of time series data: a survey. *International Journal of Computer Applications*. 2012;52(15).
5. Mirzaei A, Rahmati M, Ahmadi M. A new method for hierarchical clustering combination. *Intelligent data analysis*. 2008;12(6):549–571.
6. Mychaleckyj JC, Farber EA, Chmielewski J, et al. Buffy coat specimens remain viable as a DNA source for highly multiplexed genome-wide genetic tests after long term storage. *J Transl Med*. 2011;9:91. doi:10.1186/1479-5876-9-91
7. Marvel SW, Rotroff DM, Wagner MJ, et al. Common and rare genetic markers of lipid variation in subjects with type 2 diabetes from the ACCORD clinical trial. *PeerJ*. 2017;5:e3187. doi:10.7717/peerj.3187
8. Rotroff DM, Yee SW, Zhou K, et al. Genetic variants in CPA6 and PRPF31 are associated with variation in response to metformin in individuals with type 2 diabetes. *Diabetes*. Published online 2018:db171164.
9. Fang H, Knezevic B, Burnham KL, Knight JC. XGR software for enhanced interpretation of genomic summary data, illustrated by application to immunological traits. *Genome medicine*. 2016;8(1):129.
10. Grossmann S, Bauer S, Robinson PN, Vingron M. Improved detection of overrepresentation of Gene-Ontology annotations with parent–child analysis. *Bioinformatics*. 2007;23(22):3024–3031.
11. Marees AT, de Kluiver H, Stringer S, et al. A tutorial on conducting genome-wide association studies: Quality control and statistical analysis. *International journal of methods in psychiatric research*. 2018;27(2):e1608.
12. Privé F, Aschard H, Blum MG. Efficient implementation of penalized regression for genetic risk prediction. *Genetics*. 2019;212(1):65–74.
13. Privé F, Aschard H, Ziyatdinov A, Blum MG. Efficient analysis of large-scale genome-wide data with two R packages: bigstatsr and bigsnpr. *Bioinformatics*. 2018;34(16):2781–2787.

14. Tibshirani R. Regression shrinkage and selection via the lasso. *Journal of the Royal Statistical Society: Series B (Methodological)*. 1996;58(1):267–288.
15. Austin PC. An introduction to propensity score methods for reducing the effects of confounding in observational studies. *Multivariate behavioral research*. 2011;46(3):399–424.
16. Ho DE, Imai K, King G, Stuart EA. MatchIt: nonparametric preprocessing for parametric causal inference. *Journal of Statistical Software*, <http://gking.harvard.edu/matchit>. Published online 2011.
17. Shah HS, Gao H, Morieri ML, et al. Genetic Predictors of Cardiovascular Mortality During Intensive Glycemic Control in Type 2 Diabetes: Findings From the ACCORD Clinical Trial. *Diabetes Care*. Published online August 12, 2016;dc160285. doi:10.2337/dc16-0285
18. Benjamini Y, Hochberg Y. Controlling the false discovery rate: a practical and powerful approach to multiple testing. *Journal of the Royal Statistical Society Series B (Methodological)*. Published online 1995:289–300.
